# Supplementary material for: Oxyonium phosphobetaines – unusually stable nucleophilic catalyst–phosphate complexes formed from H-phosphonates and N-oxides
Source: Royal Society of Chemistry journal article supplement (doi:10.1039/c5ra27465f), 2016-01-01
Supplement: c5ra27465f1.pdf [file c5ra27465f1.pdf]

# Oxyonium phosphobetaines – unusually stable nucleophilic catalyst-phosphate complexes formed from *H*-phosphonates and *N*-oxides

Magdalena Materna, Jacek Stawinski, Agnieszka Kiliszek, Wojciech Rypniewski, and Michal Sobkowski\*

Institute of Bioorganic Chemistry, Polish Academy of Sciences, Noskowskiego 12/14, 61-704 Poznań, Poland

\*Corresponding Author, e-mail: msob@ibch.poznan.pl

## Supporting information

### Contents

|                                                           |    |
|-----------------------------------------------------------|----|
| 1. General experimental information .....                 | 2  |
| 2. Experimental procedures .....                          | 2  |
| 2.1. Aliphatic phosphobetaines .....                      | 2  |
| 2.2. Aromatic phosphobetaines .....                       | 3  |
| 2.3. Nucleoside phosphobetaine .....                      | 4  |
| 2.4. X-ray diffraction measurements .....                 | 4  |
| 2.5. References .....                                     | 4  |
| 3. Figures and schemes .....                              | 5  |
| 4. <sup>31</sup> P NMR spectra of reaction mixtures ..... | 8  |
| 5. NMR and MS spectra of the isolated products .....      | 20 |
| 5.1. Betaine <b>5a</b> .....                              | 20 |
| 5.2. Betaine <b>5b</b> .....                              | 26 |
| 5.3. Betaine <b>5d</b> .....                              | 33 |
| 5.4. Betaine <b>5e</b> .....                              | 39 |
| 5.5. Betaine <b>5f</b> .....                              | 46 |

## 1. General experimental information

NMR spectra were recorded on Bruker Avance II 400 MHz machine. All reagents were of analytical grade, obtained from commercial suppliers and used without further purification. Anhydrous solvents used for reactions were stored over molecular sieves 4 Å and the content of water was controlled by Karl Fischer coulometric titration, (Metrohm 684 KF coulometer). TLC analyses were carried out on Merck silica gel 60 F 254 precoated plates using DCM–MeOH 7:3 v/v solvent system.

Powdered molecular sieves were activated by heating for 24 h at 150 °C under vacuum (<0.1 Torr). Pivaloyl chloride was distilled and used within one month. Aliphatic *N*-oxides were rendered anhydrous using the method by Soderquist and Anderson.<sup>1</sup>

Immediately prior to reactions, all solid reactants were dissolved in pyridine and evaporated to dryness to evacuate any residual moisture (2x). The procedure was repeated with toluene (1x) to remove remains of pyridine. Insufficient removal of water leads to formation of increased amounts of phenyl *H*-phosphonate **2a** (the main or sole by-product) in the reaction mixtures.

The rates and yields of formation of phosphobetaines were higher in polar solvents (DMF, acetonitrile) than in DCM; however, precipitation was more effective in DCM and this solvent was used typically for preparative purposes. For *in situ* generation of phosphobetaines, DMF or acetonitrile are recommended.

Caution! The reactions of *N*-oxides with aryl *H*-phosphonate diesters are highly exothermic and dichloromethane (DCM) used as a solvent may boil violently upon mixing the reactants.

## 2. Experimental procedures

### 2.1. Aliphatic phosphobetaines

#### *General procedure*

*N*-Oxide **3** (1.5 mmol) was dissolved in anhydrous DCM (5 mL). Diphenyl *H*-phosphonate **1a** (96 µl, 0.5 mmol) was added while stirring and the stirring was continued for 20 min at room temperature. White microcrystalline precipitate was collected by filtration, washed with DCM, and dried under vacuum.

#### *N-methylmorpholino-4-ium phenyl phosphate (5b)*

Yield: 80 mg (60%). M.p. 103–105 °C;  $R_f$  0.25;

<sup>1</sup>H NMR (400 MHz, D<sub>2</sub>O):  $\delta_H$  3.94 (s, 3H), 3.98 (d,  $J= 11.9$  Hz, 2H), 4.16 (quint,  $J= 12.2$  Hz, 4H), 4.35 (d,  $J= 13.6$  Hz, 2H), 7.31 (d,  $^3J= 8.1$  Hz, 2H), 7.35 (t,  $^3J= 7.4$  Hz, 1H), 7.52 (t,  $^3J= 7.9$  Hz, 2H);

<sup>13</sup>C NMR (100 MHz, D<sub>2</sub>O):  $\delta_C$  55.7, 61.0, 65.2, 120.0 (d,  $^3J_{CP}= 3.8$  Hz), 125.4, 130.0, 150.8 (d,  $^2J_{CP}= 8.0$  Hz);

<sup>31</sup>P NMR (162 MHz, H<sub>2</sub>O):  $\delta_P$  –9.4 (s);

HRMS ESI ( $m/z$  calcd. for C<sub>11</sub>H<sub>16</sub>NO<sub>5</sub>P: 273.0766), negative ion mode, found 272.0667 [M–H]<sup>–</sup>; positive ion mode, found 296.0662 [M+Na]<sup>+</sup>.

In order to obtain crystals suitable for X-ray analysis, the reaction was carried out in 15 ml of DCM without stirring and left for a few hours at room temperature in an open flask protected with a soft paper towel to allow slow evaporation of the solvent. The crystals were collected, washed briefly with DCM, dried under vacuum, and kept under nitrogen in a refrigerator.

### **Trimethylammonium phenyl phosphate (5e)**

Yield: 58 mg (50%). M.p. 112–114 °C;  $R_f$  0.22;

$^1\text{H}$  NMR (400 MHz,  $\text{D}_2\text{O}$ ):  $\delta_{\text{H}}$  3.87 (s, 9H), 7.30 (d,  $^3J = 8.2$  Hz, 2H), 7.34 (t,  $^3J = 7.5$  Hz, 1H), 7.51 (t,  $^3J = 7.9$  Hz, 2H);

$^{13}\text{C}$  NMR (100 MHz,  $\text{D}_2\text{O}$ ):  $\delta_{\text{C}}$  58.1, 119.9 (d,  $^3J_{\text{CP}} = 3.8$  Hz), 125.2, 130.0, 150.9 (d,  $^2J_{\text{CP}} = 7.9$  Hz);

$^{31}\text{P}$  NMR (162 MHz,  $\text{H}_2\text{O}$ ):  $\delta_{\text{P}} -9.4$  (s);

HRMS ESI ( $m/z$  calcd. for  $\text{C}_9\text{H}_{14}\text{NO}_4\text{P}$ : 231.0660), negative ion mode, found 230.0565  $[\text{M}-\text{H}]^-$ ; positive ion mode, found 254.0544  $[\text{M}+\text{Na}]^+$ .

In order to obtain crystals suitable for X-ray analysis, the reaction was carried out in 5 ml of DCM without stirring and left overnight at 4 °C in an open flask protected with a soft paper towel to allow slow evaporation of the solvent. The crystals were collected, washed briefly with DCM, dried under vacuum, and kept under nitrogen in a refrigerator.

## **2.2. Aromatic phosphobetaines**

### **4-methoxy pyridin-1-ium-1-yl phenyl phosphate (5a)**

4-Methoxypyridine *N*-oxide **3a** (188 mg, 1.5 mmol) was dissolved in anhydrous acetonitrile (4 mL). Diphenyl *H*-phosphonate **1a** (96  $\mu\text{L}$ , 0.5 mmol) was added while stirring and the stirring was continued for 10 min at 40 °C. Then, the reaction mixture was diluted with diethyl ether (8 mL) and left at 4 °C overnight. Yellowish precipitate was collected by filtration, washed with ether, and dried under vacuum.

Yield: 93 mg (66%). M.p. 150–153 °C;  $R_f$  0.74;

$^1\text{H}$  NMR (400 MHz,  $\text{DMF}-d_7$ )  $\delta_{\text{H}}$  4.22 (s, 3H), 7.09 (m, 1H), 7.30 (m, 4H), 7.70 (d,  $^3J = 7.8$  Hz, 2H), 9.02 (d,  $^3J = 7.3$  Hz, 2H);

$^{13}\text{C}$  NMR (100 MHz,  $\text{DMF}-d_7$ )  $\delta_{\text{C}}$  58.8, 113.9, 120.6 (d,  $^3J_{\text{CP}} = 4.4$  Hz), 123.8, 129.9, 144.3, 153.9 (d,  $^2J_{\text{CP}} = 7.3$  Hz), 170.6;

$^{31}\text{P}$  NMR (162 MHz,  $\text{DMF}$ )  $\delta_{\text{P}} -5.5$  (s);

HRMS ESI ( $m/z$  calcd. for  $\text{C}_{13}\text{H}_{15}\text{N}_2\text{O}_4\text{P}$ : 281.0453) positive ion mode, found 304.0355  $[\text{M}+\text{Na}]^+$ . No expected molecular ion was found in the negative ion mode.

### **4-methylpyridin-1-ium-1-yl phenyl phosphate (5c)**

4-Methylpyridine *N*-oxide **3c** (164 mg, 1.5 mmol) was dissolved in anhydrous acetonitrile (4 mL). Diphenyl *H*-phosphonate **1a** (96  $\mu\text{L}$ , 0.5 mmol) was added while stirring. Compound **5c** ( $\delta_{\text{P}} -5.6$  ppm) was formed in ca. 40% yield ( $^{31}\text{P}$  NMR; Figs. S7a/b). Attempts to isolate it were unsuccessful.

### **4-(Dimethylamino)pyridin-1-ium-1-yl phenyl phosphate (5d)**

4-(*N,N*-Dimethylamino)pyridine *N*-oxide **3d** (218 mg, 1.5 mmol) was dissolved in anhydrous DCM/diethyl ether (1:1 v/v, 20 mL) solvent system. Diphenyl *H*-phosphonate **1a** (96  $\mu\text{L}$ , 0.5 mmol) was added while stirring and the stirring was continued for 30 min at room temperature (last 20 min in an open flask). White microcrystalline precipitate was collected by filtration, washed with ether and dried under vacuum.

Yield: 120 mg (81%). M.p. 185–188 °C;  $R_f$  0.38;

$^1\text{H}$  NMR (400 MHz,  $\text{D}_2\text{O}$ ):  $\delta_{\text{H}}$  3.22 (s, 6H), 6.86 (d,  $^3J = 7.3$  Hz, 2H), 7.20 (d,  $^3J = 7.7$  Hz, 2H), 7.27 (t,  $^3J = 7.4$  Hz, 1H), 7.43 (t,  $^3J = 7.9$  Hz, 2H), 8.19 (d,  $^3J = 8.0$  Hz, 2H);

$^{13}\text{C}$  NMR (100 MHz,  $\text{D}_2\text{O}$ ):  $\delta_{\text{C}}$  39.3, 106.5, 119.3 (d,  $^3J_{\text{CP}} = 4.1$  Hz), 124.7, 129.6, 138.1, 150.5 (d,  $^2J_{\text{CP}} = 7.7$  Hz), 155.3;

$^{31}\text{P}$  NMR (162 MHz,  $\text{H}_2\text{O}$ ):  $\delta_{\text{P}} -4.8$  (s);

HRMS ESI ( $m/z$  calcd. for  $\text{C}_{13}\text{H}_{15}\text{N}_2\text{O}_4\text{P}$ : 294.0769), positive ion mode, found 317.0723  $[\text{M}+\text{Na}]^+$ . No expected molecular ion was found in the negative ion mode.

### 2.3. Nucleoside phosphobetaine

#### *N*-methylmorpholino-4-ium 5'-*O*-dimethoxytritylthymidin-3'-yl phosphate (**5f**)

5'-*O*-(4,4'-Dimethoxytrityl)thymidine (272 mg, 0.5 mmol) was dissolved in anhydrous dimethylformamide/pyridine (7:3, v/v) solvent system (5 mL) in the presence of activated powdered molecular sieves 4 Å. Diphenyl *H*-phosphonate **1a** (239 µl, 1.25 mmol) was added while stirring and the stirring was continued for 20 min at room temperature. *N*-Methylmorpholine *N*-oxide **3b** (352 mg, 3.0 mmol) was dissolved in the same solvent system over activated powdered molecular sieves 4 Å (5 mL), added to the reaction mixture and left stirred for 10 min at room temperature. Molecular sieves were removed by filtration and washed with toluene (ca. 25 ml). Combined solutions were concentrated to ca 10–15 ml in a rotary evaporator. Cold diethyl ether (50 ml) was added dropwise while stirring and the mixture was left at 0 °C for 1 h. The solution was decanted, the precipitate was dissolved in DCM and washed twice with freshly prepared saturated aqueous solution of sodium bicarbonate. The organic layer was dried with anhydrous Na<sub>2</sub>SO<sub>4</sub> and evaporated to dryness. The residue was dissolved in DCM and precipitated with cold diethyl ether. The white solid obtained was dried under vacuum.

Yield: 159 mg (44%). *R*<sub>f</sub> 0.85;

<sup>1</sup>H NMR (400 MHz, DMSO-*d*<sub>6</sub>) δ<sub>H</sub> 1.40 (s, 3H), 2.40 (m, 2H), 3.25 (dd, *J*= 9.0 and 9.6 Hz, 2H), 3.39 (br, 4H), 3.69 (s, 3H), 3.74 (s, 6H), 3.91 (t, *J*= 7.7 Hz, 2H), 4.09 (t, *J*= 9.9 Hz, 2H), 4.17 (br, 1H), 4.88 (br, 1H), 6.21 (t, *J*= 7.1 Hz, 1H), 6.89 (d, *J*= 8.9 Hz, 4H), 7.24 (t, 1H), 7.25 (d, *J*= 8.8 Hz, 4H), 7.31 (t, *J*= 7.5 Hz, 2H), 7.38 (d, *J*= 7.6 Hz, 2H), 7.51 (s, 1H), 11.38 (br, 1H);

<sup>13</sup>C NMR (100 MHz, DMSO-*d*<sub>6</sub>) δ<sub>C</sub> 11.5, 38.1, 55.0, 56.5, 60.5, 62.8, 63.8, 74.4, 83.7, 84.4, 85.9, 109.6, 113.2, 126.8, 127.6, 127.9, 129.7, 135.1, 135.4, 144.6, 150.3, 158.1, 163.6;

<sup>31</sup>P NMR (162 MHz, DMSO) δ<sub>P</sub> -3.7 (d, <sup>3</sup>*J*= 7.0 Hz);

HRMS ESI (*m/z* calcd. for C<sub>9</sub>H<sub>14</sub>NO<sub>4</sub>P: 723.2556), negative ion mode, found 722.2450 [M-H]<sup>-</sup>; positive ion mode, found 746.2413 [M+Na]<sup>+</sup>.

### 2.4. X-ray diffraction measurements

The X-ray diffraction measurements on monocrystals were performed at 100 K on beamline 14.2 at the BESSY synchrotron in Berlin using a Mar Research MX-225 detector. The resolution range of the reflections for both compounds was 20-0.81 Å and the X-ray wavelength was 0.88561 Å. The data were integrated and scaled using the HKL200 software.<sup>2</sup> The structures were solved by direct methods using SHELXT<sup>3</sup> and refined using SHELXL.<sup>4</sup> The R-factor for the final model of **5b** and for all data was 0.0475, and for **5e** it was 0.0256. The crystallographic data have been deposited at the Cambridge Crystallographic Data Centre and allocated with the deposition numbers: CCDC 1425902 for **5b** and 1425903 for **5e**.

### 2.5. References

1 J. A. Soderquist, C. L. Anderson, *Tetrahedron Lett.*, 1986, **27**, 3961.

2 Z. Otwinowski, W. Minor, Processing of X-Ray Diffraction Data Collected in Oscillation Mode, in *Methods in Enzymology*, vol. **276: Macromolecular Crystallography Part A**; Academic Press: 1997, pp 307-326.

(3) G. M. Sheldrick, *Acta Crystallographica Section A*, 2015, **71**, 3.

(4) G. M. Sheldrick, *Acta Crystallographica Section A*, 2008, **64**, 112.

### 3. Figures and schemes

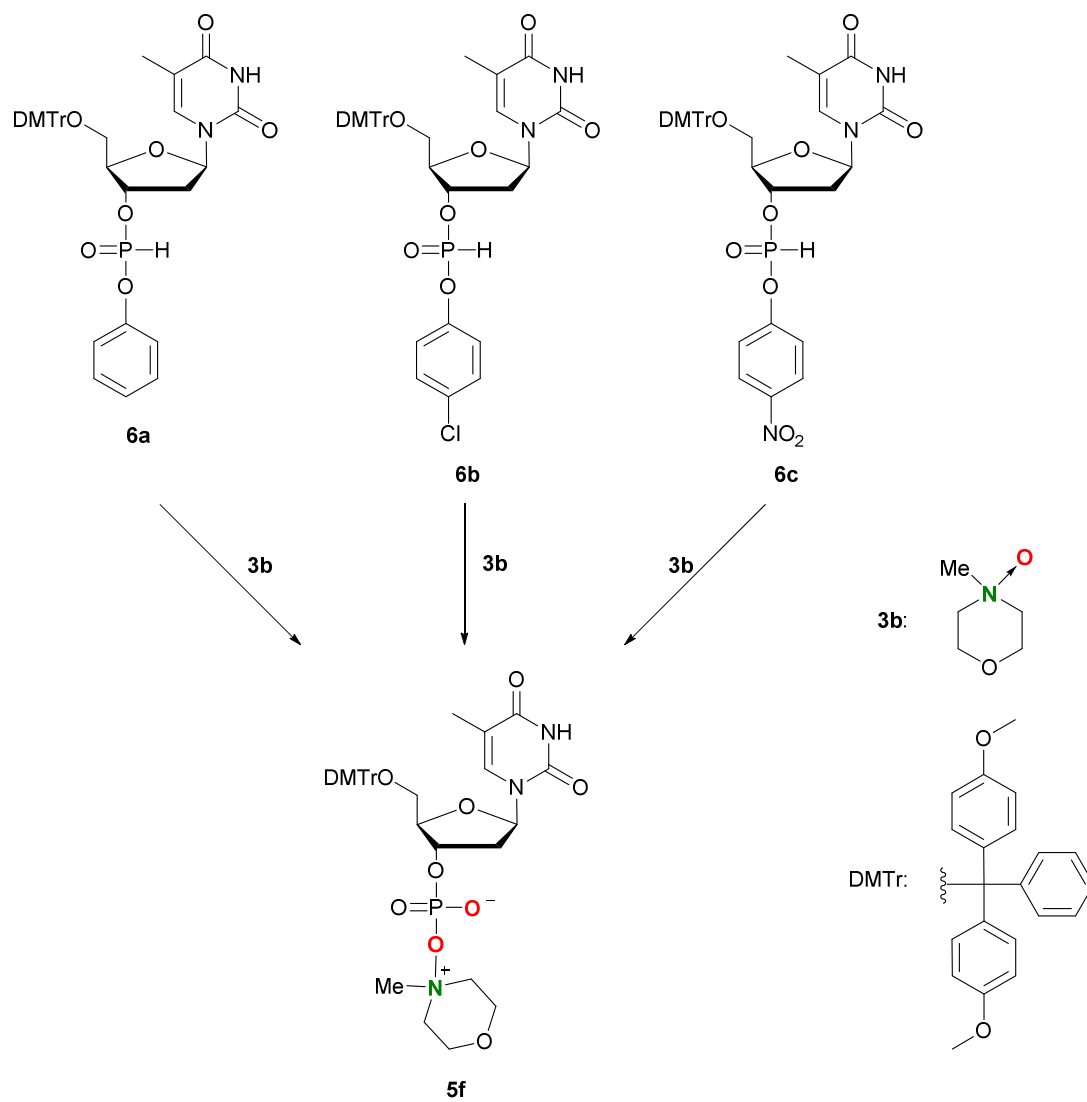

**Scheme S1** Reactions of aryl nucleoside *H*-phosphonate diesters with *N*-methylmorpholine *N*-oxide (**3b**). For  $^{31}\text{P}$  NMR spectra of crude **5f**, see Figs. S9a/b.

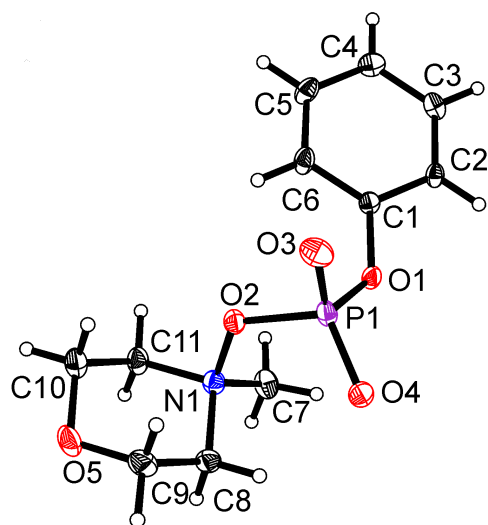

**Fig. S1a** Crystal structure of betaine **5b**. Displacement ellipsoids are drawn at the 50% probability level and H atoms are shown as small spheres of arbitrary radii.

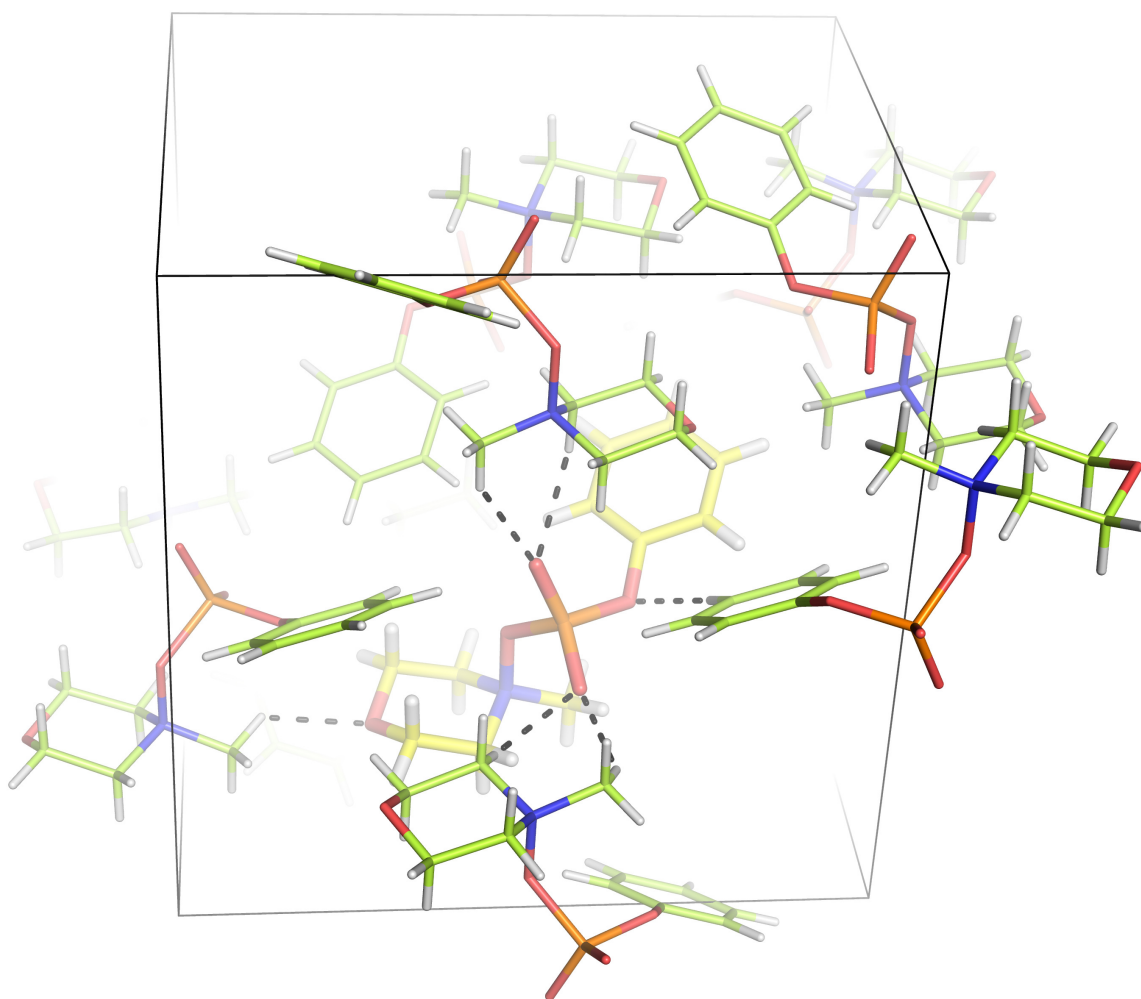

**Fig. S1b** The unit cell of betaine **5b**. Weak C-H...O interactions found are shown with dotted lines.

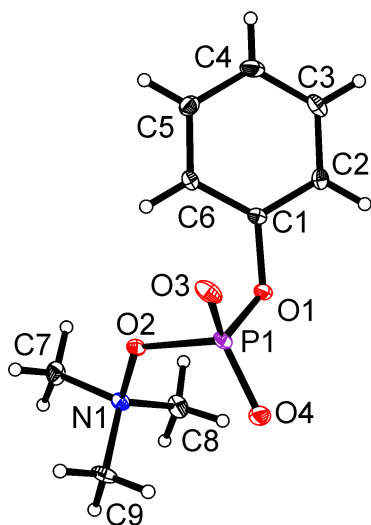

**Fig. S2a** Crystal structure of betaine **5e**. Displacement ellipsoids are drawn at the 50% probability level and H atoms are shown as small spheres of arbitrary radii.

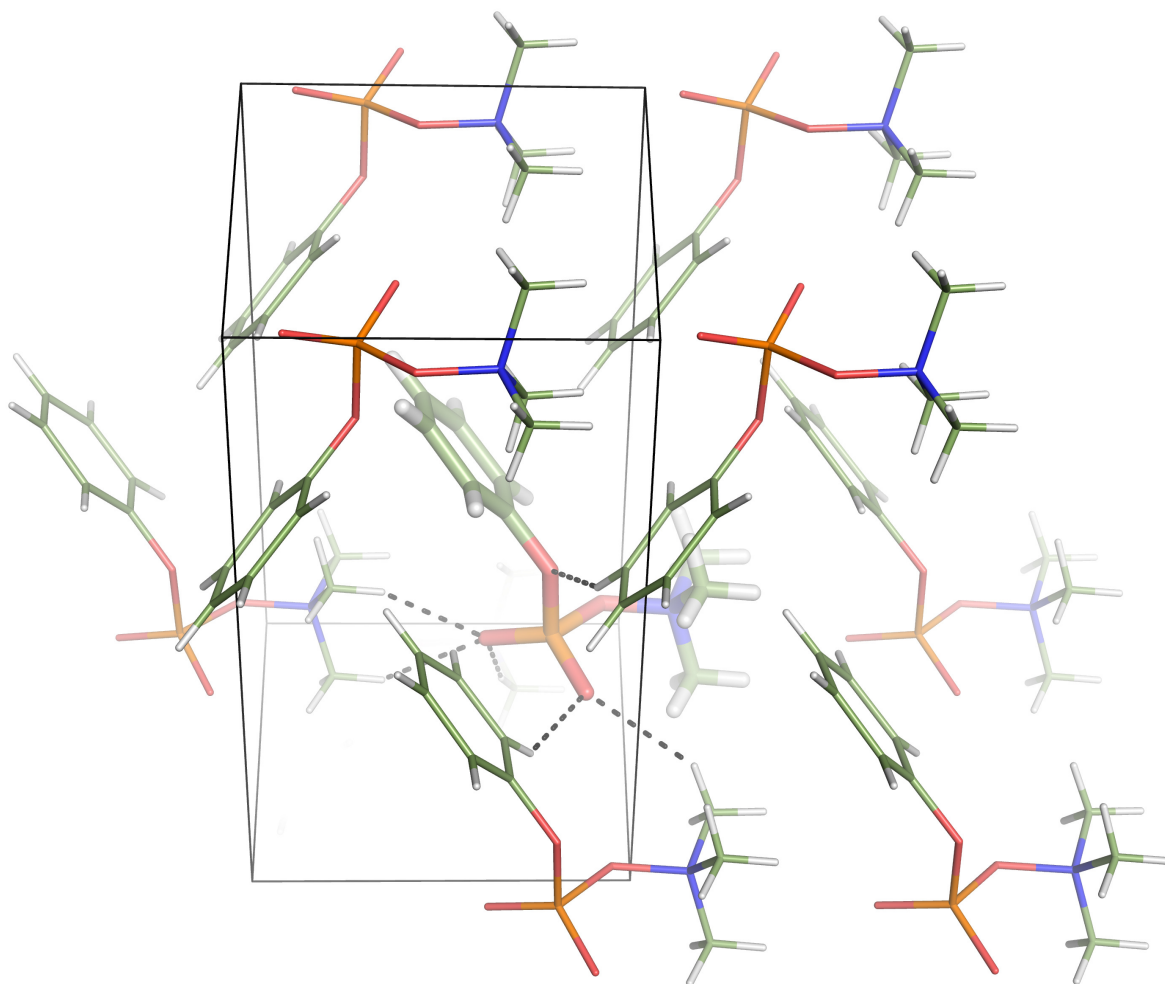

**Fig. S2b** The unit cell of betaine **5e**. Weak C–H...O interactions found are shown with dotted lines.

#### 4. $^{31}\text{P}$ NMR spectra of the reaction mixtures

5a.l-10min

$^{31}\text{P}\{^1\text{H}\}$  NMR (ACN;  $\text{H}_3\text{PO}_4$  as external reference)

— -0.016  
— -0.460  
— -5.399

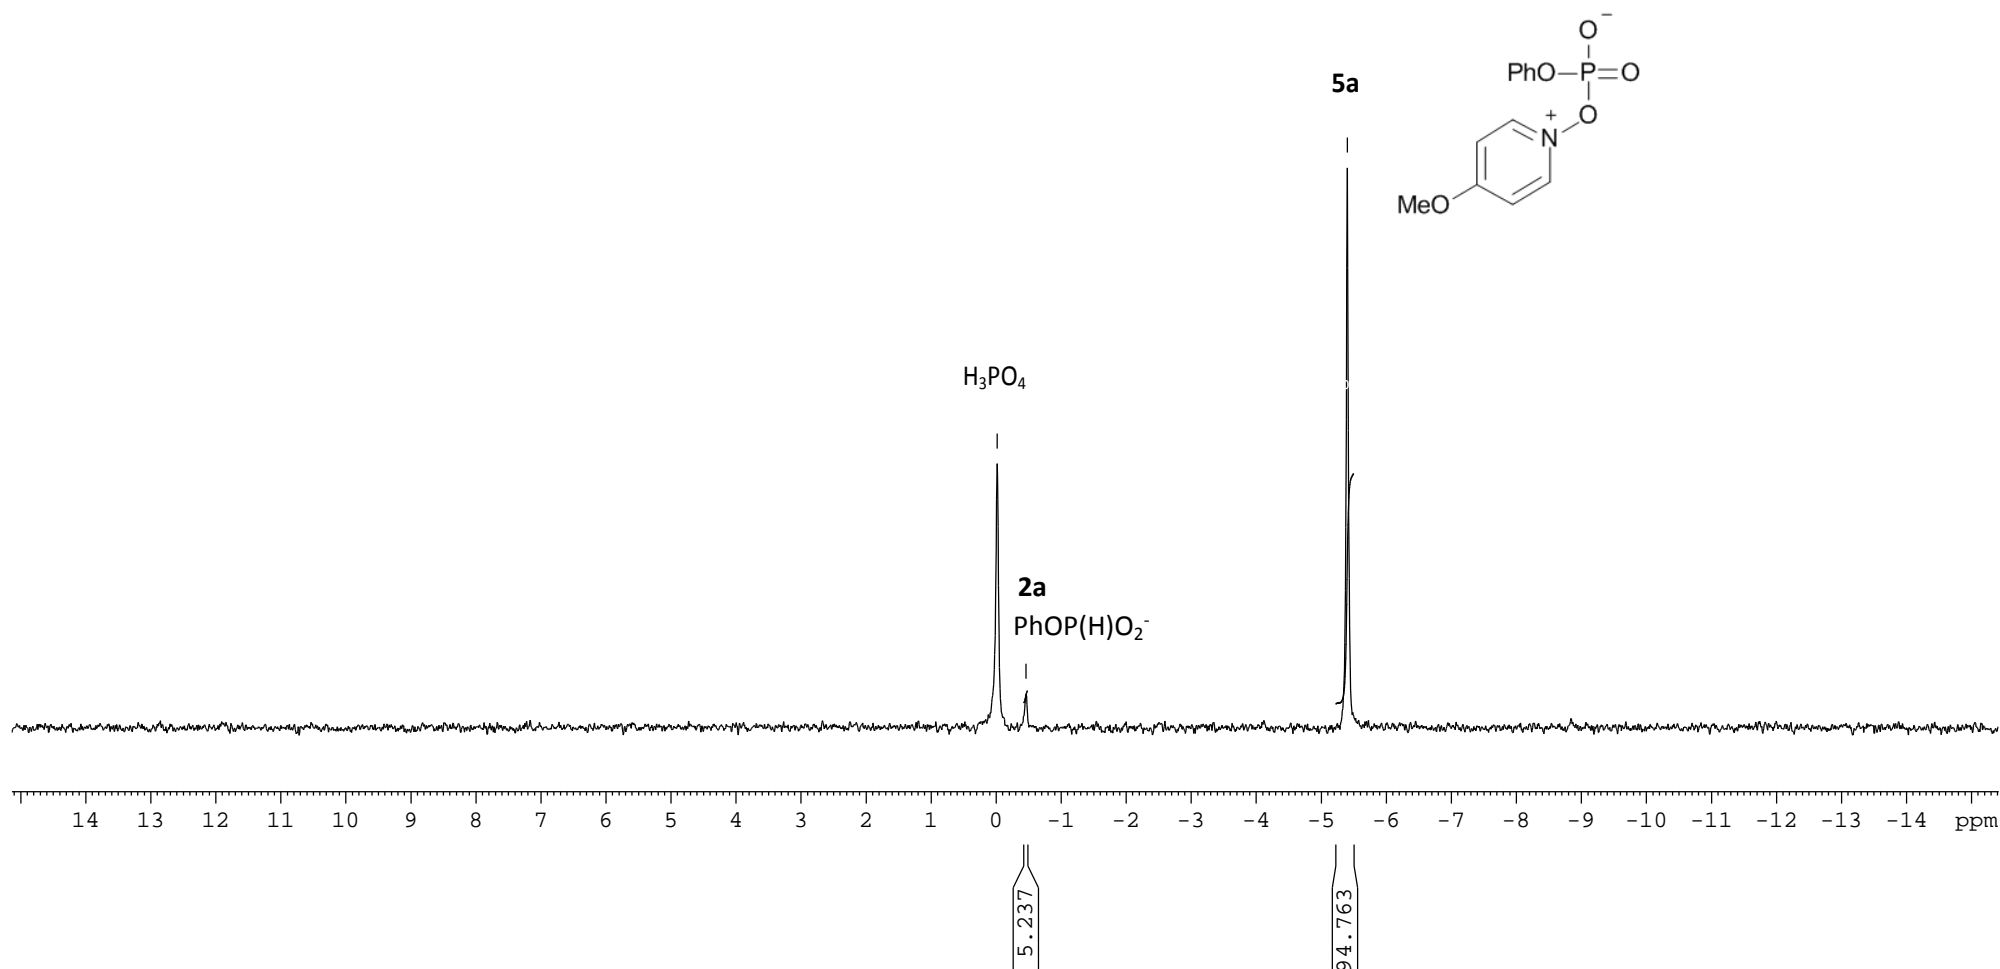

**Fig. S3a** Reaction of  $(\text{PhO})_2\text{P(H)O}$  **1a** with *p*MeOPy *N*-oxide **3a** in acetonitrile. Proton-decoupled  $^{31}\text{P}$  NMR spectrum of the reaction mixture after ca. 10 min.



5a.l-10min

$^{31}\text{P}$  NMR (ACN;  $\text{H}_3\text{PO}_4$  as external reference)

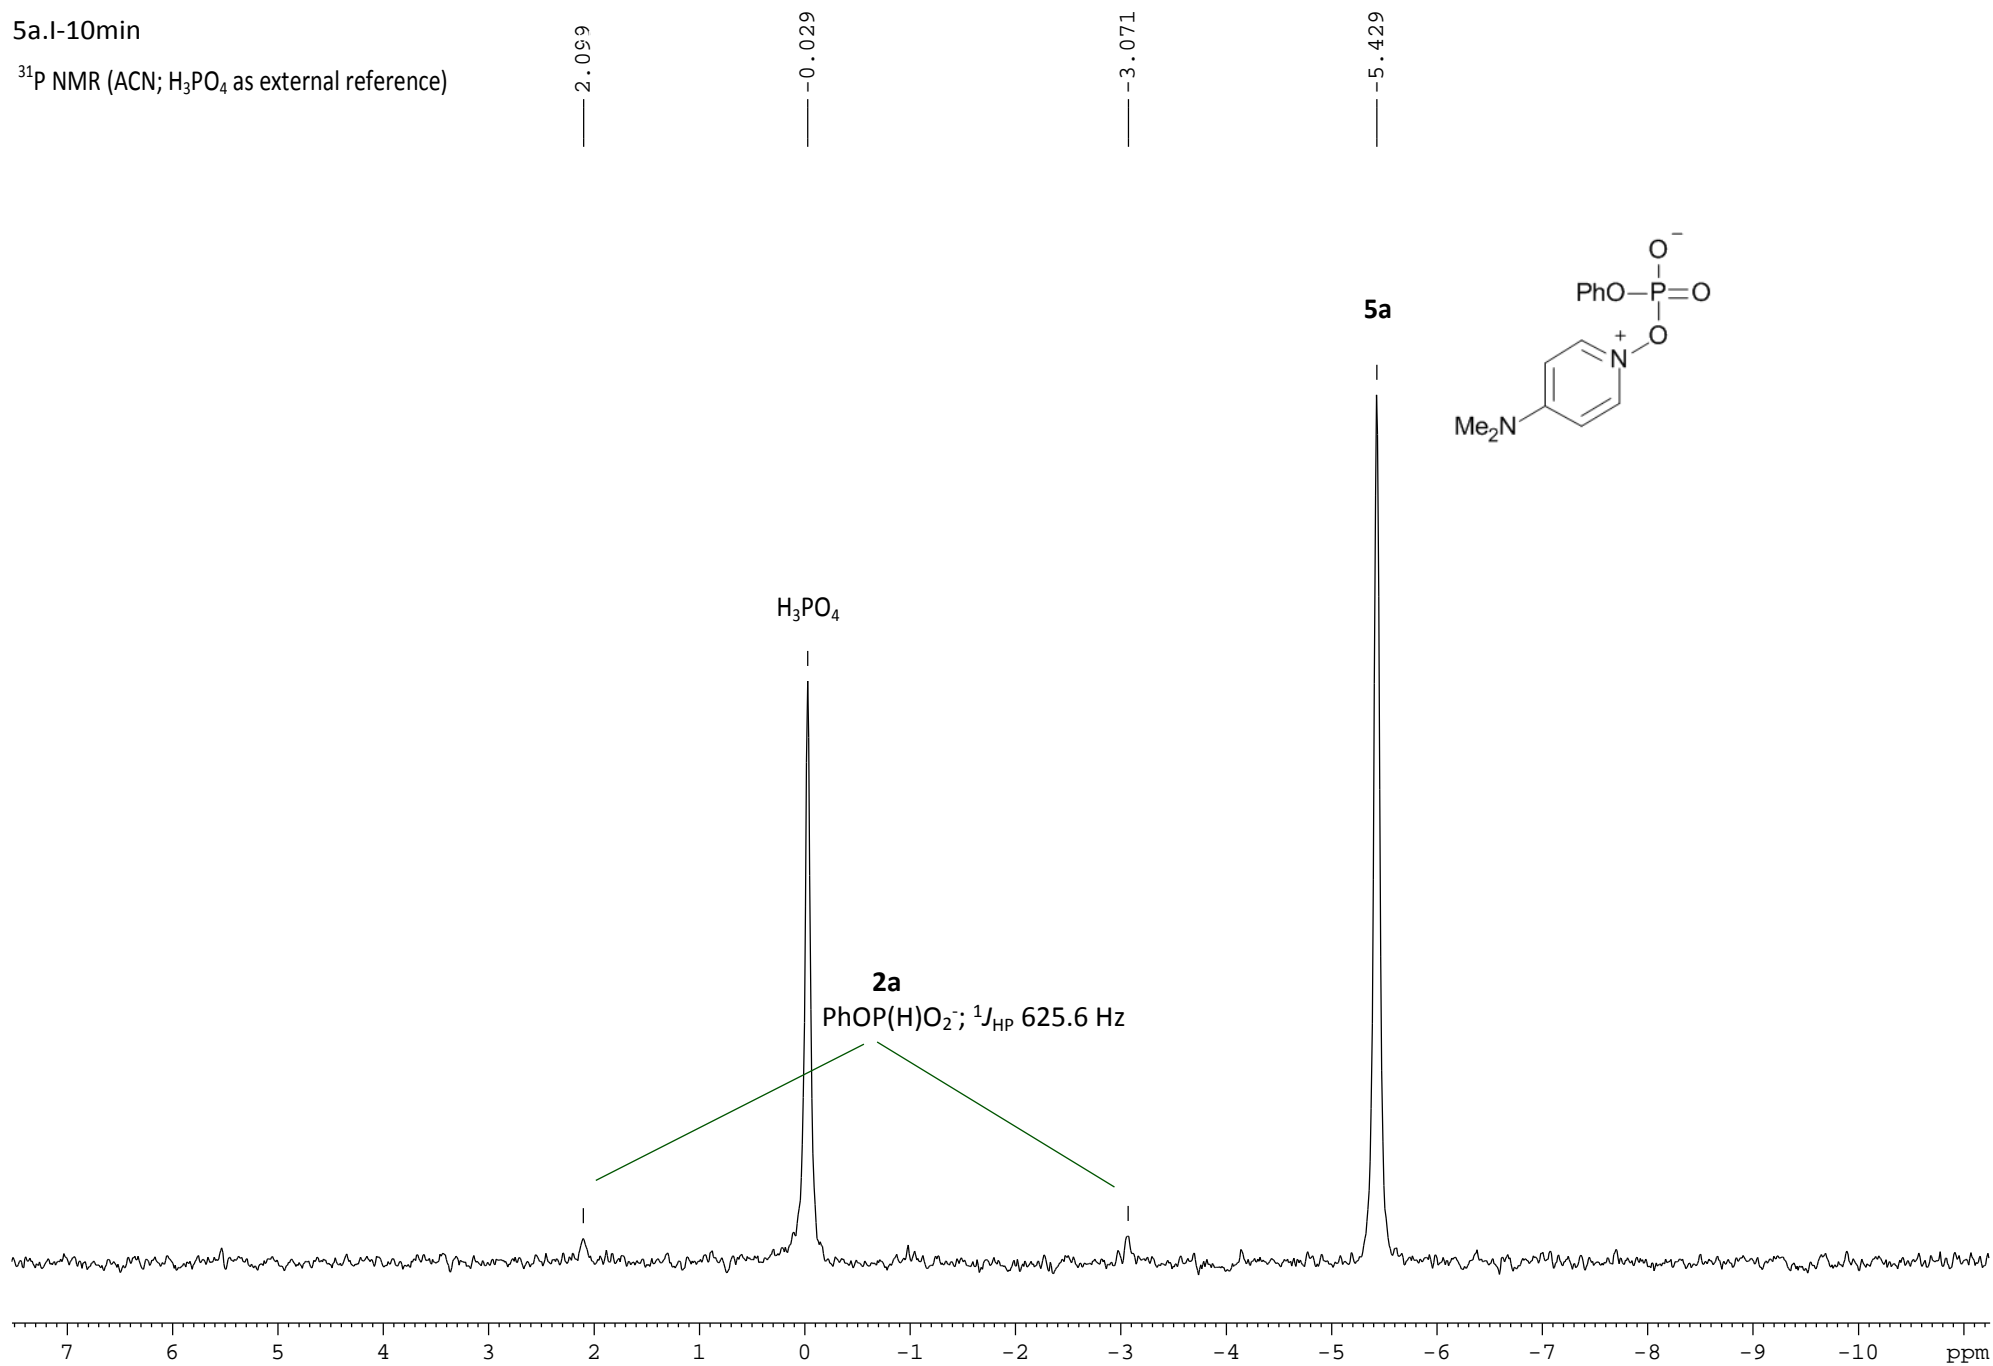

**Fig. S3b** Reaction of  $(\text{PhO})_2\text{P}(\text{H})\text{O}$  **1a** with *p*MeOPy *N*-oxide **3a** in acetonitrile.

$^{31}\text{P}$  NMR spectrum of the reaction mixture after ca. 10 min.

5b.1-5min

$^{31}\text{P}\{^1\text{H}\}$  NMR (ACN;  $\text{H}_3\text{PO}_4$  as external reference)

0.001

-1.196

-8.359

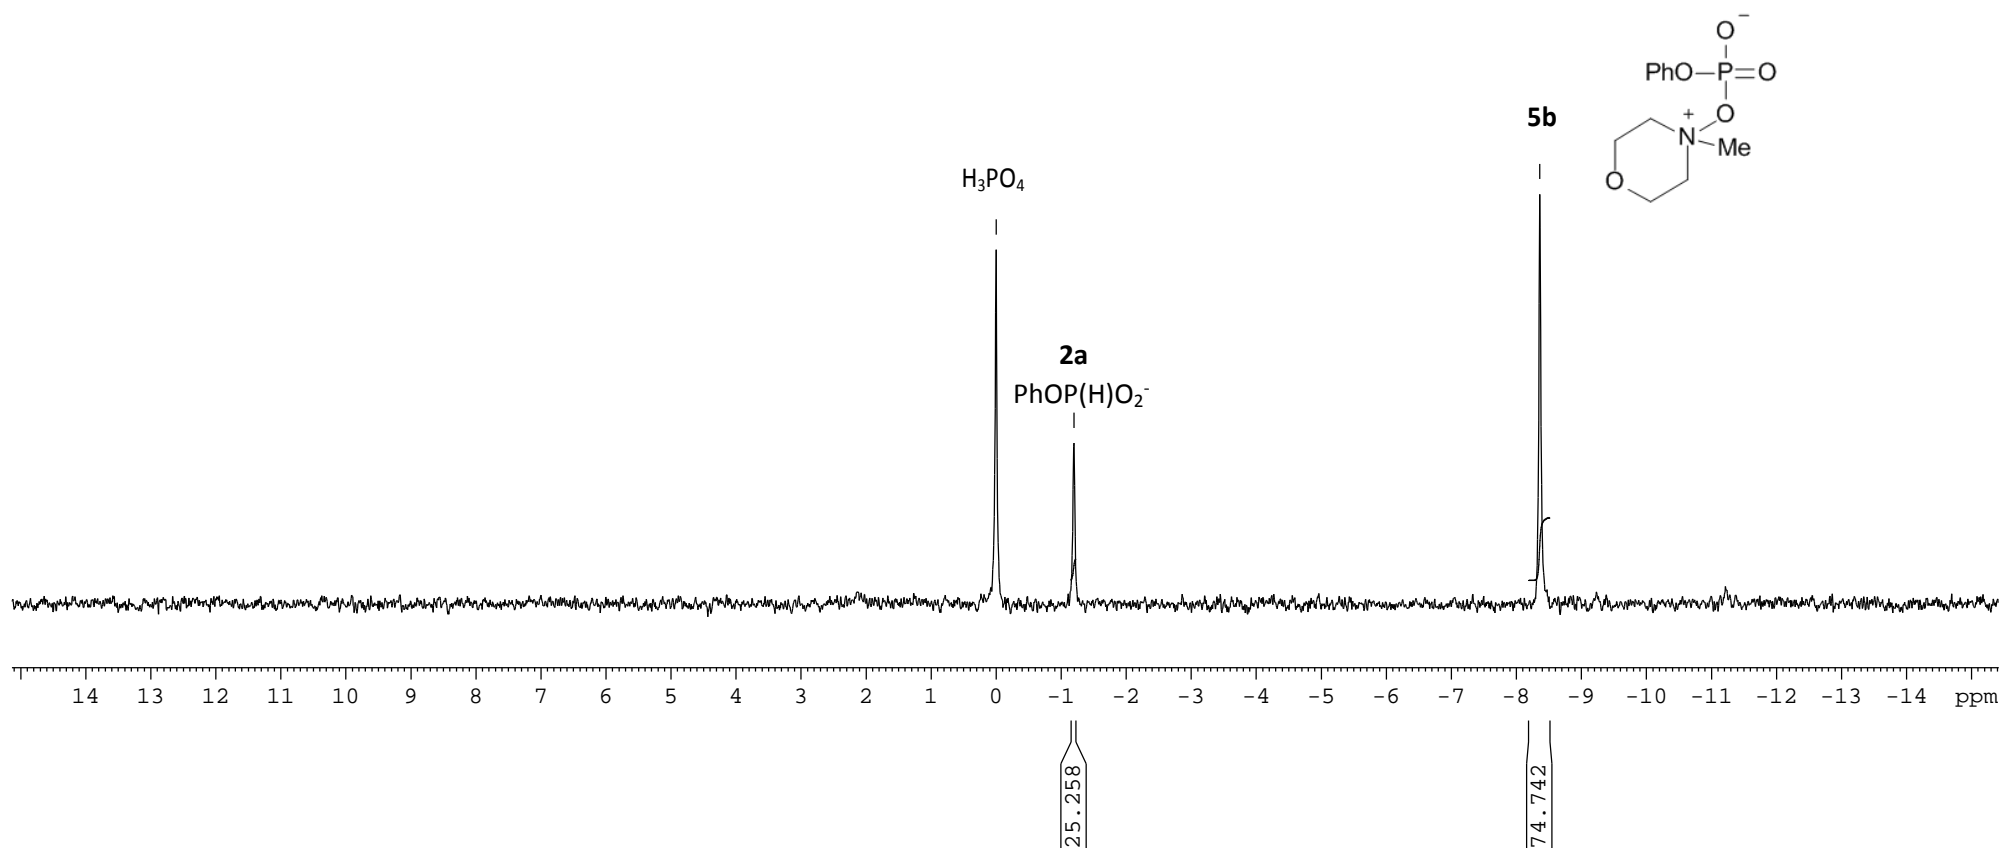

**Fig. S4a** Reaction of  $(\text{PhO})_2\text{P(H)O}$  **1a** with NMM *N*-oxide **3b** in acetonitrile. Proton-decoupled  $^{31}\text{P}$  NMR spectrum of the reaction mixture after ca. 5 min.

5b.1-5min

$^{31}\text{P}$  NMR (ACN;  $\text{H}_3\text{PO}_4$  as external reference)

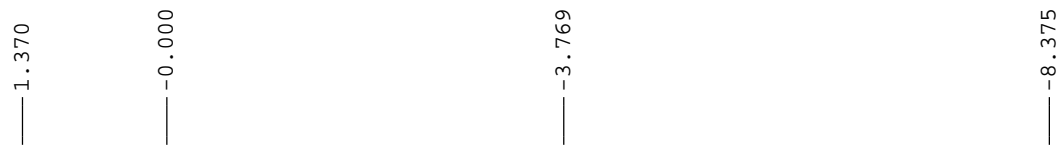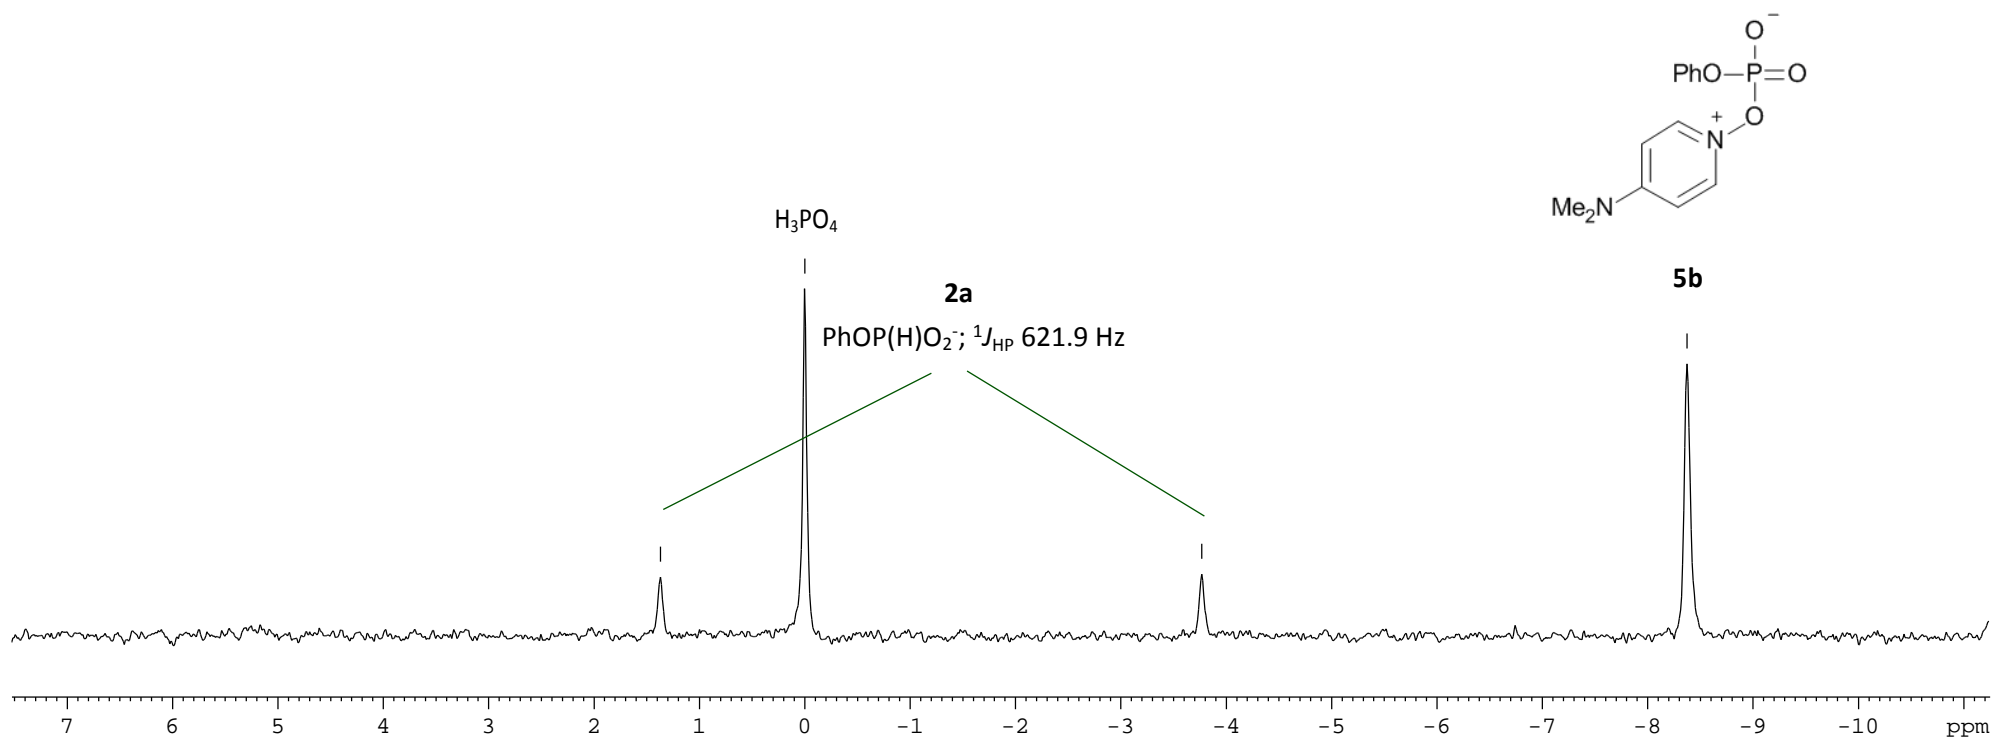

**Fig. S4b** Reaction of  $(\text{PhO})_2\text{P}(\text{H})\text{O}$  **1a** with NMM *N*-oxide **3b** in acetonitrile.

$^{31}\text{P}$  NMR spectrum of the reaction mixture after ca. 5 min.

5c.I-10min

$^{31}\text{P}\{^1\text{H}\}$  NMR (ACN;  $\text{H}_3\text{PO}_4$  as external reference)

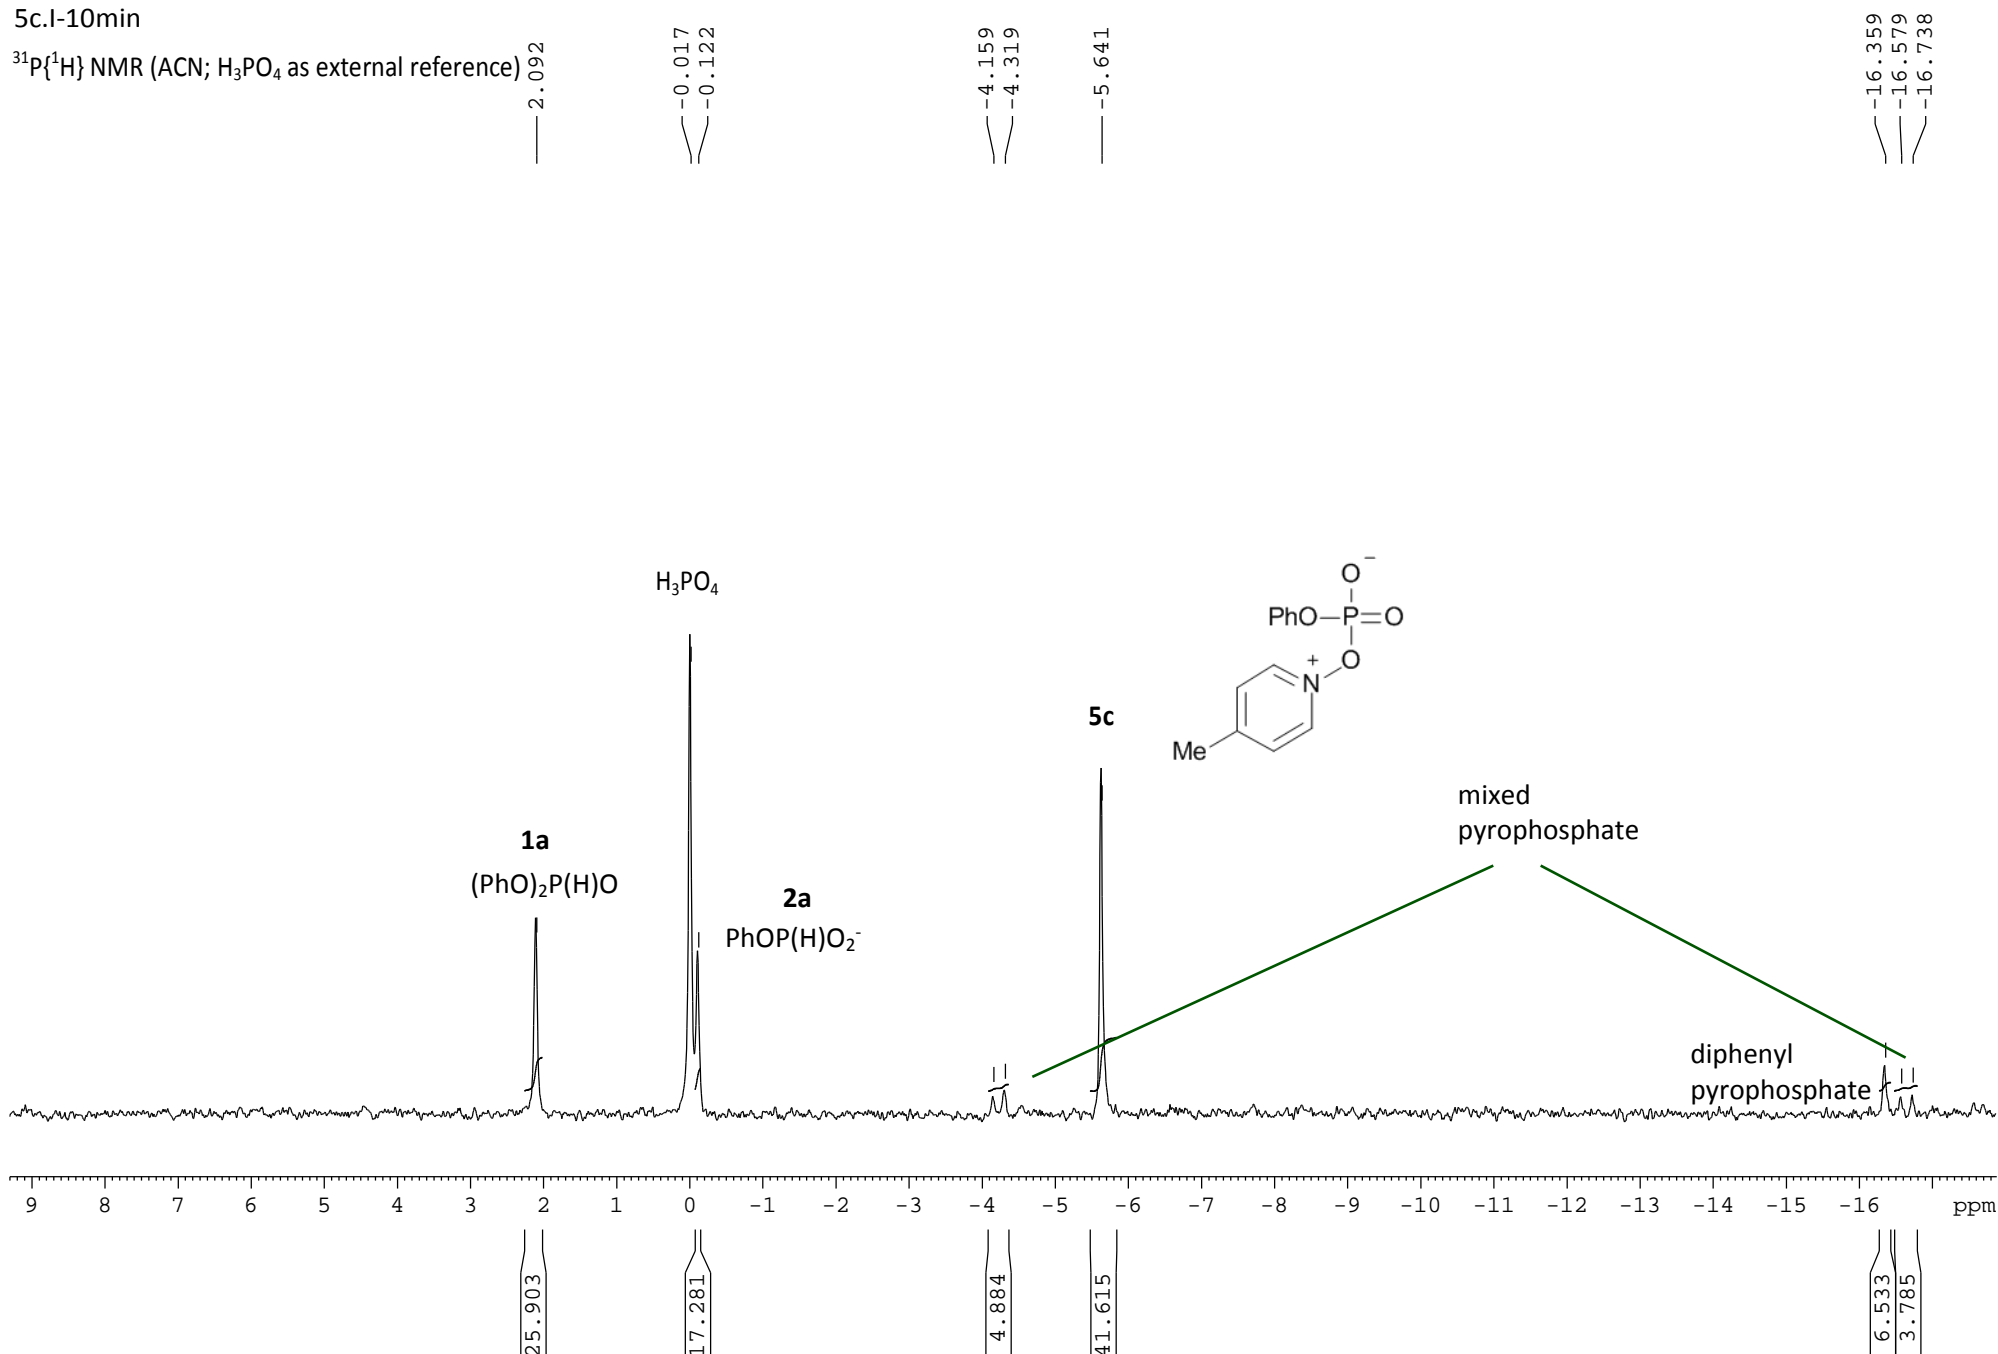

**Fig. S5a** Reaction of  $(\text{PhO})_2\text{P}(\text{H})\text{O}$  **1a** with *p*MePy *N*-oxide **3c** in acetonitrile. Proton-decoupled  $^{31}\text{P}$  NMR spectrum of the reaction mixture after ca. 10 min.

5c.l-10min

$^{31}\text{P}$  NMR (ACN;  $\text{H}_3\text{PO}_4$  as external reference)

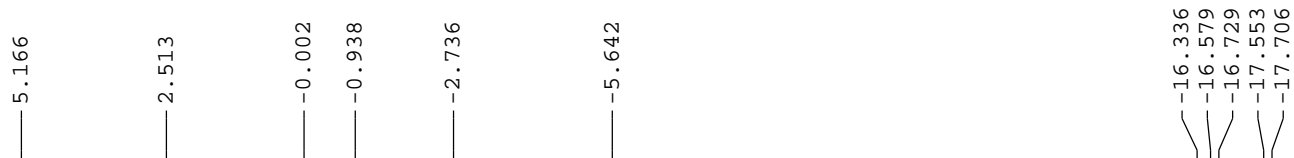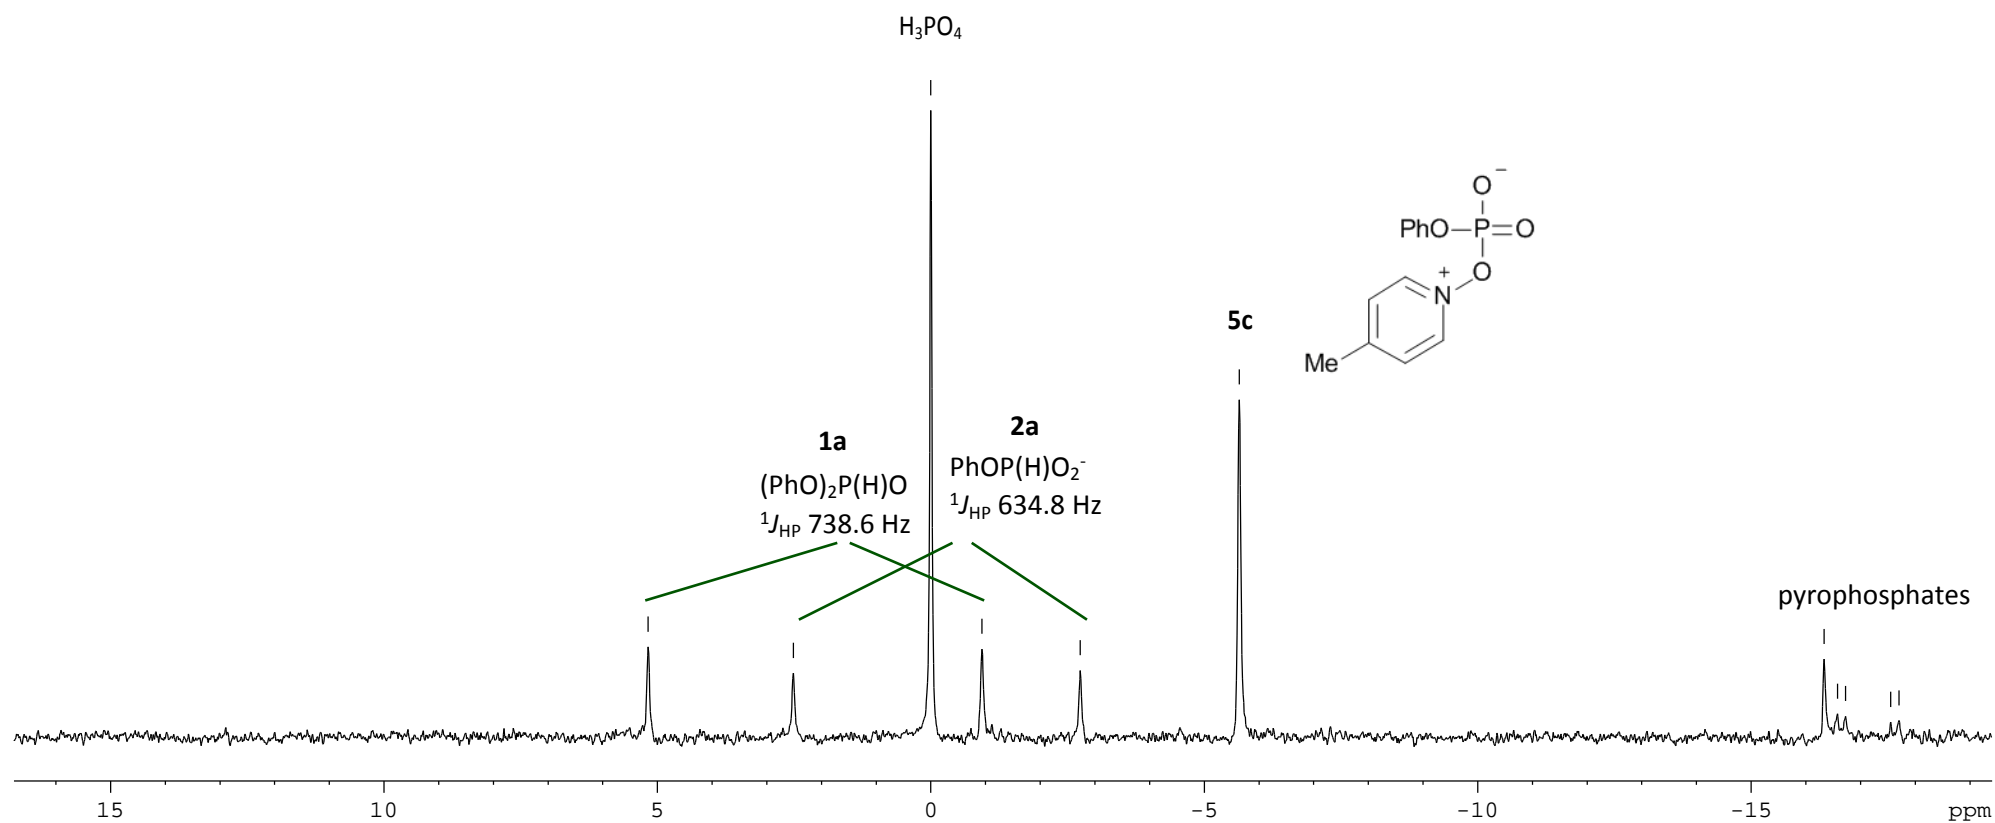

**Fig. S5b** Reaction of  $(\text{PhO})_2\text{P}(\text{H})\text{O}$  **1a** with *p*MePy *N*-oxide **3c** in acetonitrile.

$^{31}\text{P}$  NMR spectrum of the reaction mixture after ca. 10 min.

5d.I-2min

$^{31}\text{P}\{^1\text{H}\}$  NMR (ACN;  $\text{H}_3\text{PO}_4$  as external reference)

— 0.008  
— 1.292  
— 4.991

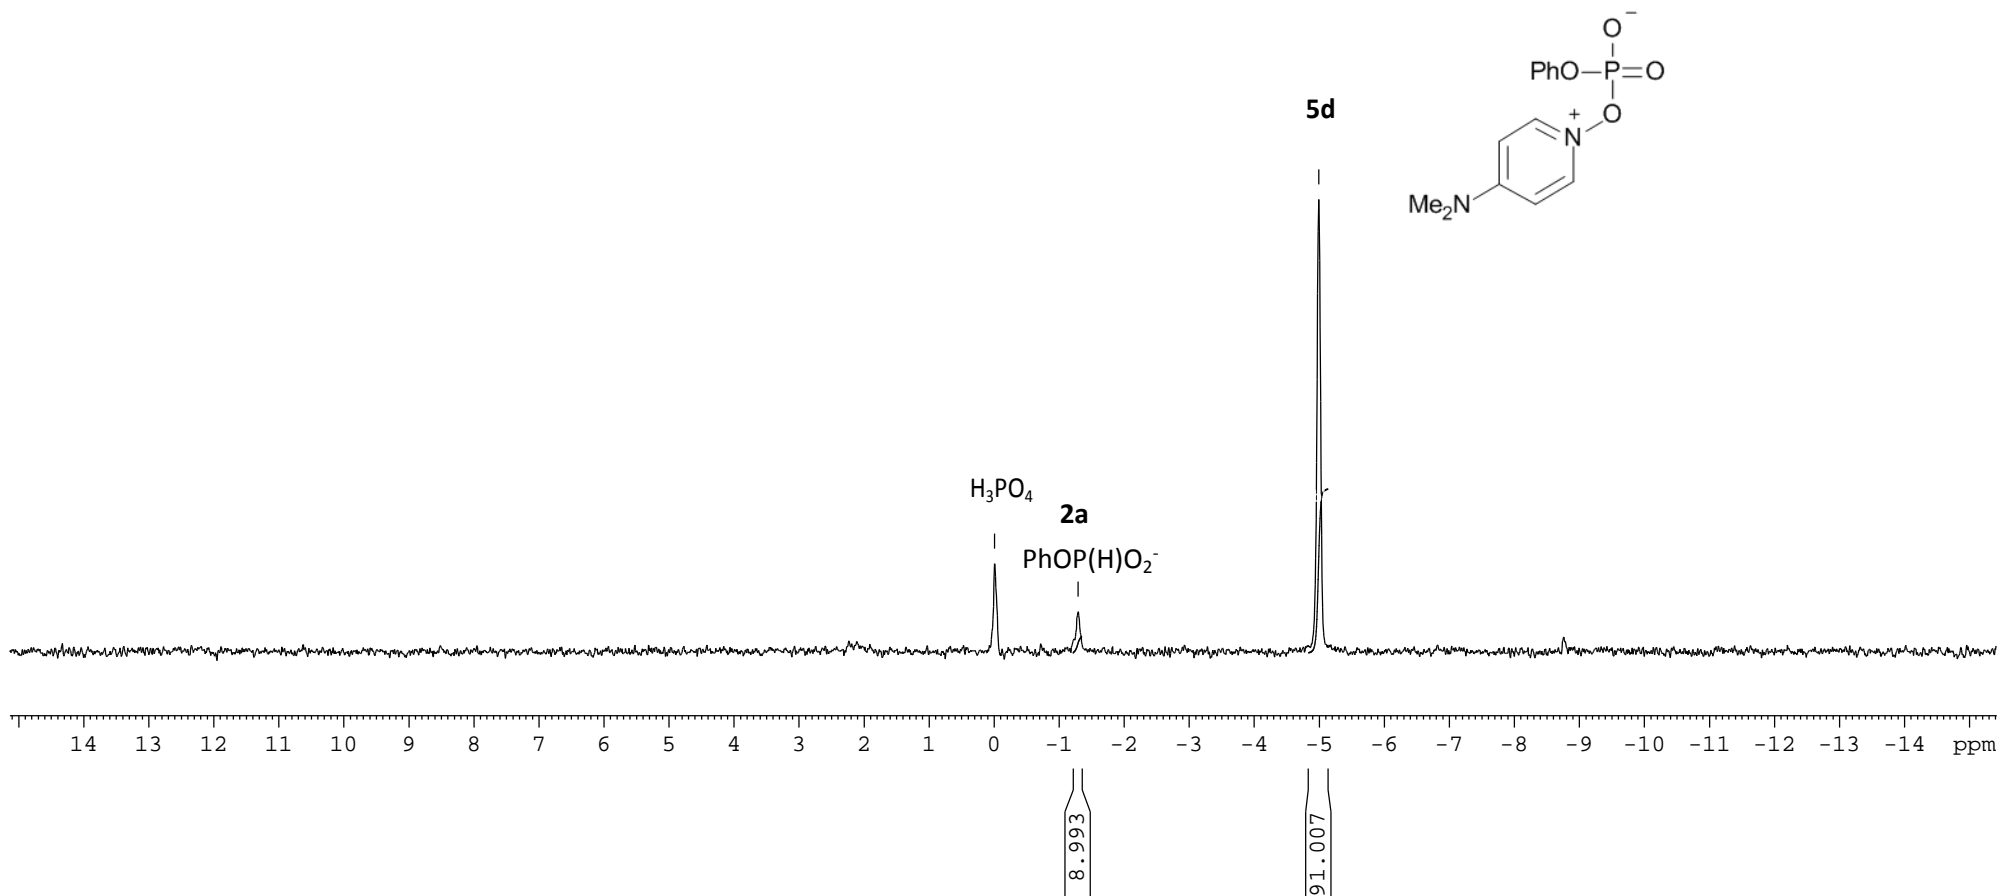

**Fig. S6a** Reaction of  $(\text{PhO})_2\text{P(H)O}$  **1a** with DMAP *N*-oxide **3d** in acetonitrile. Proton-decoupled  $^{31}\text{P}$  NMR spectrum of the reaction mixture after ca. 2 min.

5d.1-2min

$^{31}\text{P}$  NMR (ACN;  $\text{H}_3\text{PO}_4$  as external reference)

— 1.212 — -0.004 — -3.782 — -4.989

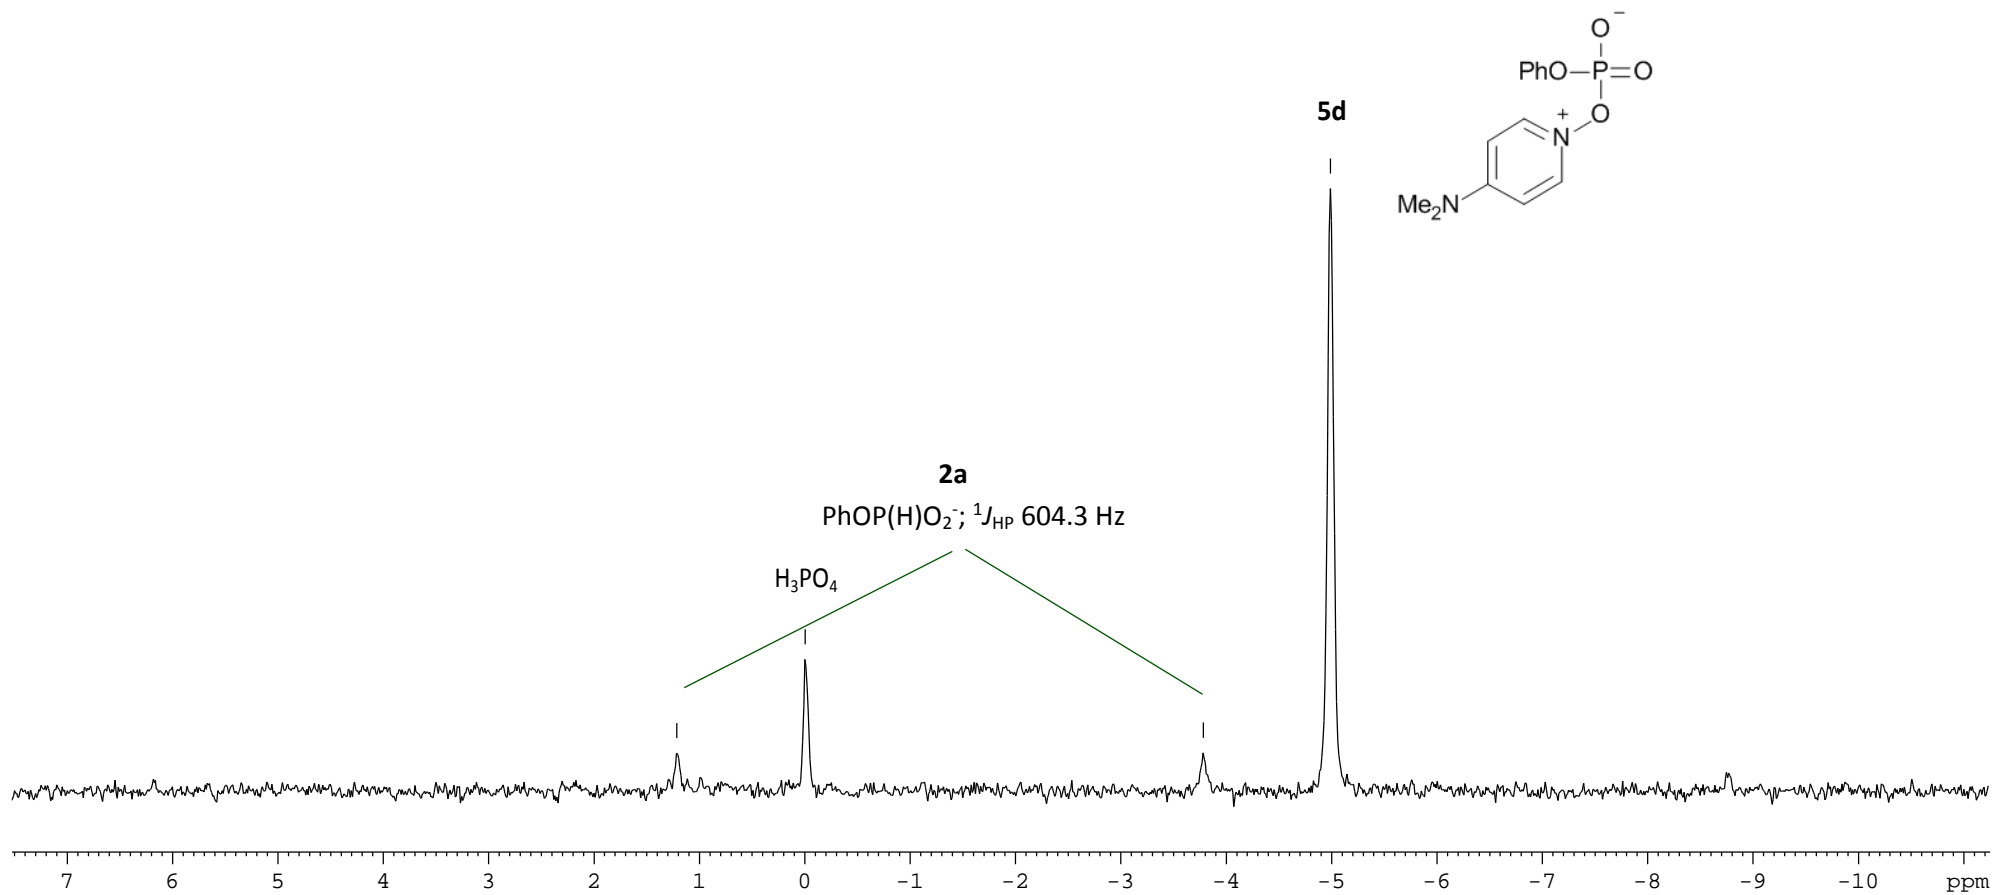

**Fig. S6b** Reaction of  $(\text{PhO})_2\text{P(H)O}$  **1a** with DMAP *N*-oxide **3d** in acetonitrile.

$^{31}\text{P}$  NMR spectrum of the reaction mixture after ca. 2 min.

5e.l-2min

$^{31}\text{P}\{^1\text{H}\}$  NMR (ACN;  $\text{H}_3\text{PO}_4$  as external reference)

0.004  
-1.316  
-8.221

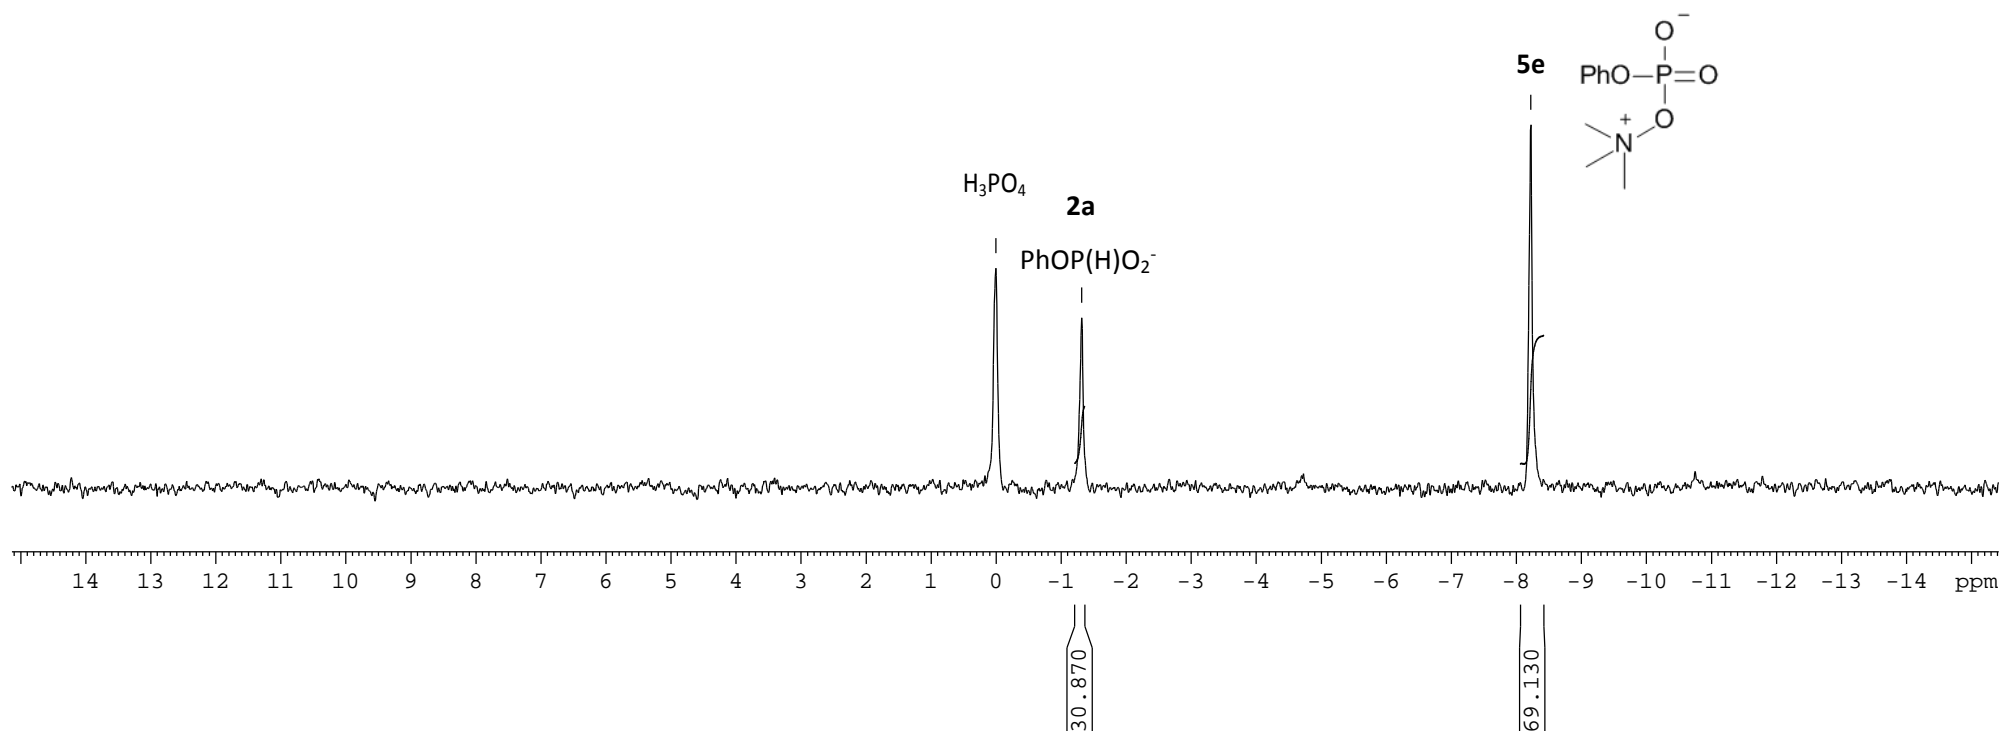

**Fig. S7a** Reaction of  $(\text{PhO})_2\text{P(H)O}$  **1a** with  $\text{Me}_3\text{N}$  *N*-oxide **3e** in acetonitrile. Proton-decoupled  $^{31}\text{P}$  NMR spectrum of the reaction mixture after ca. 2 min.



5e.1-2min

$^{31}\text{P}$  NMR (ACN;  $\text{H}_3\text{PO}_4$  as external reference)

— 1.175      — -0.020      — -3.867      — -8.250

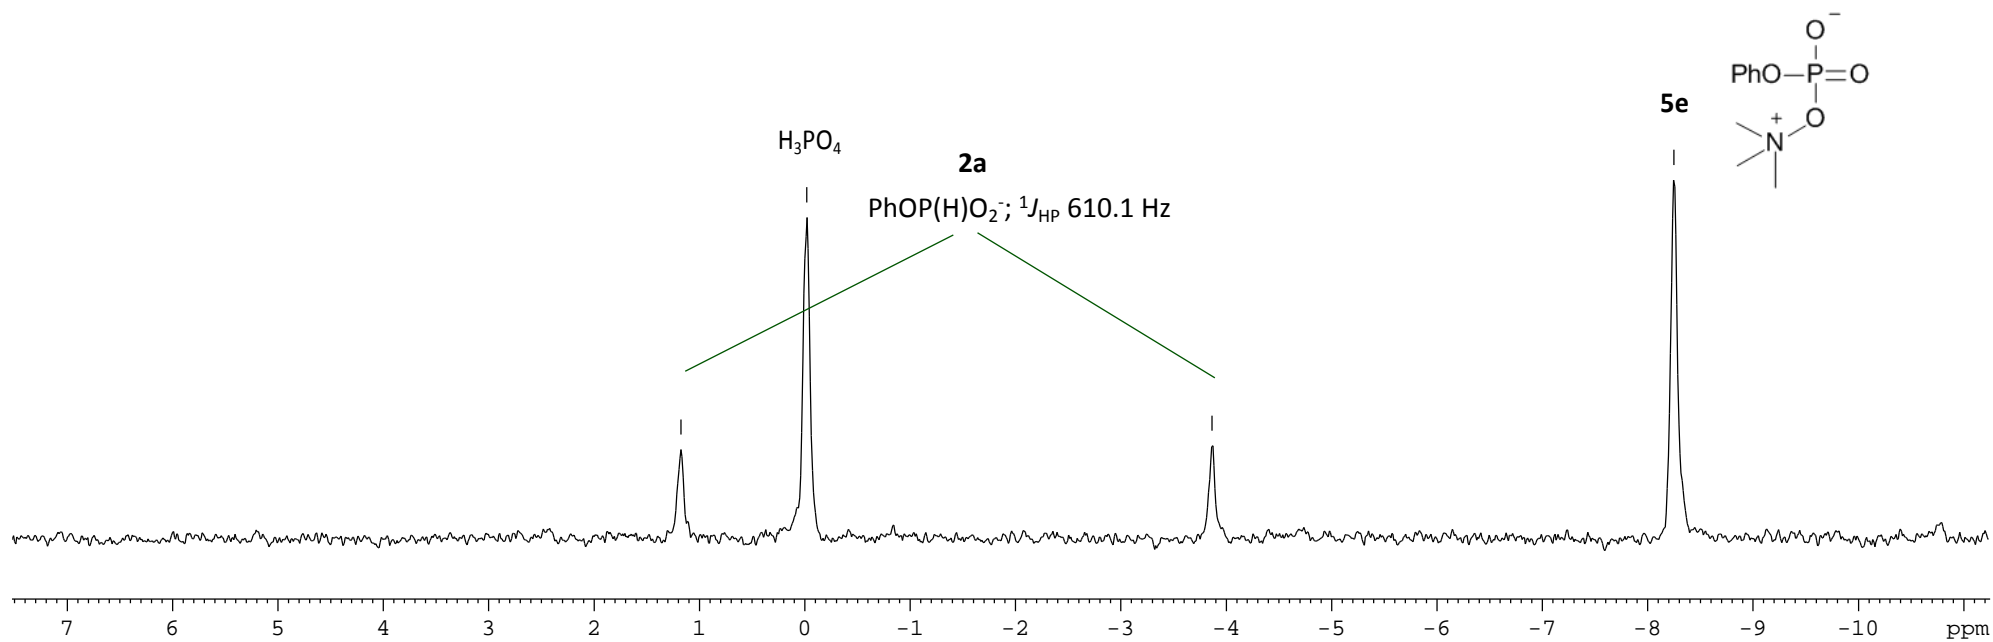

**Fig. S7b** Reaction of  $(\text{PhO})_2\text{P(H)O}$  **1a** with  $\text{Me}_3\text{N}$  *N*-oxide **3e** in acetonitrile.

$^{31}\text{P}$  NMR spectrum of the reaction mixture after ca. 2 min.

5f.II-10min

$^{31}\text{P}\{^1\text{H}\}$  NMR (DMF/Py (7:3);  $\text{H}_3\text{PO}_4$  as external reference)

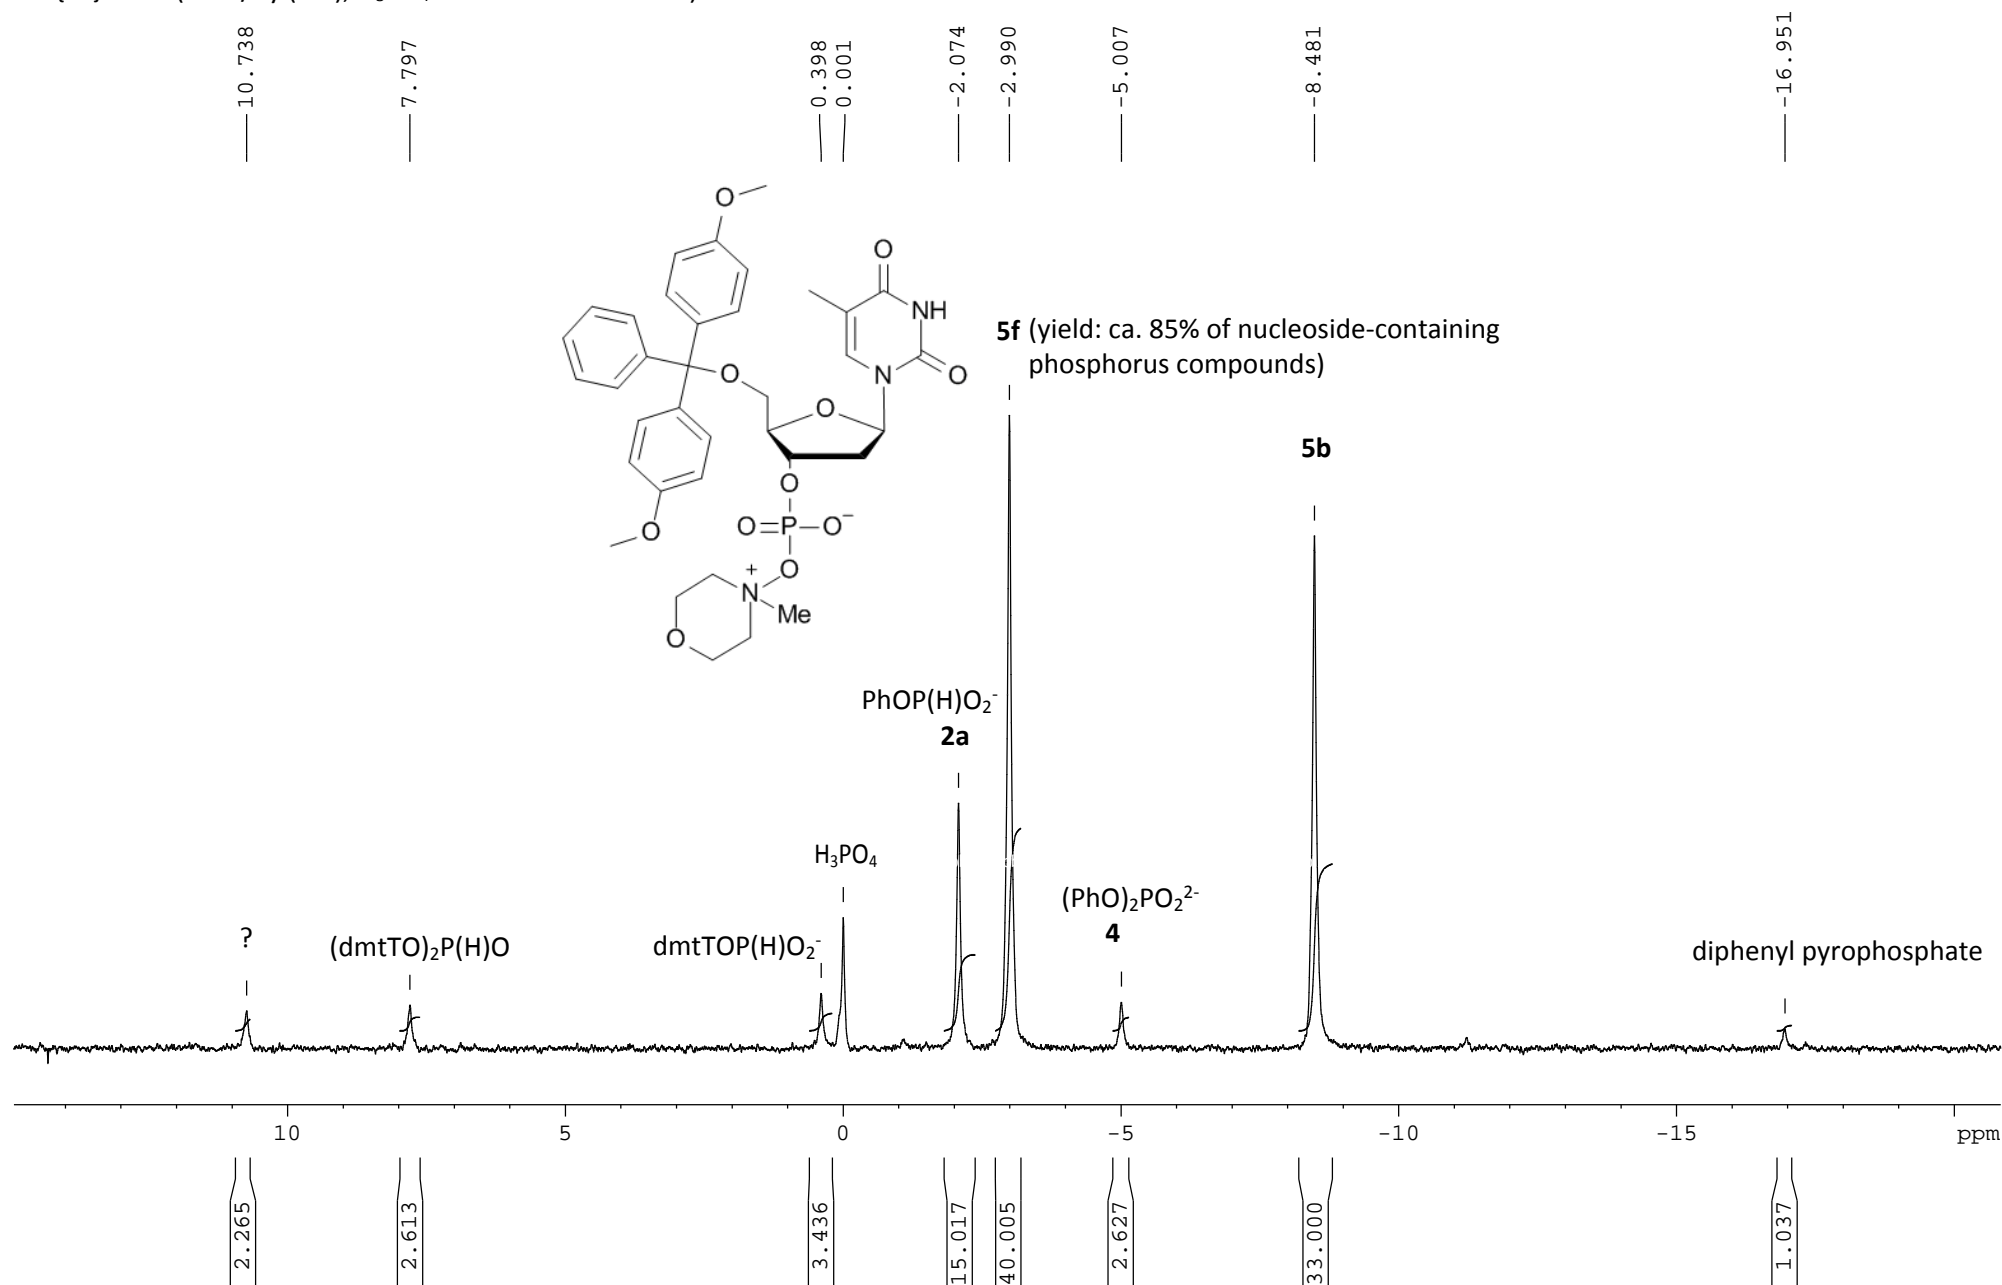

**Fig. S8a** Reaction of an *in situ* generated  $(\text{PhO})(\text{dmtTO})\text{P}(\text{H})\text{O}$  (ca. 0.5 mmol) and the excess of  $(\text{PhO})_2\text{P}(\text{H})\text{O}$  (ca. 0.75 mmol) with NMM *N*-oxide **3b** (3 mmol) in DMF-pyridine 7:3 (v/v). Proton-decoupled  $^{31}\text{P}$  NMR spectrum of the reaction mixture after ca. 10 min.

5f.II-10min

$^{31}\text{P}$  NMR (DMF/Py (7:3);  $\text{H}_3\text{PO}_4$  as external reference)

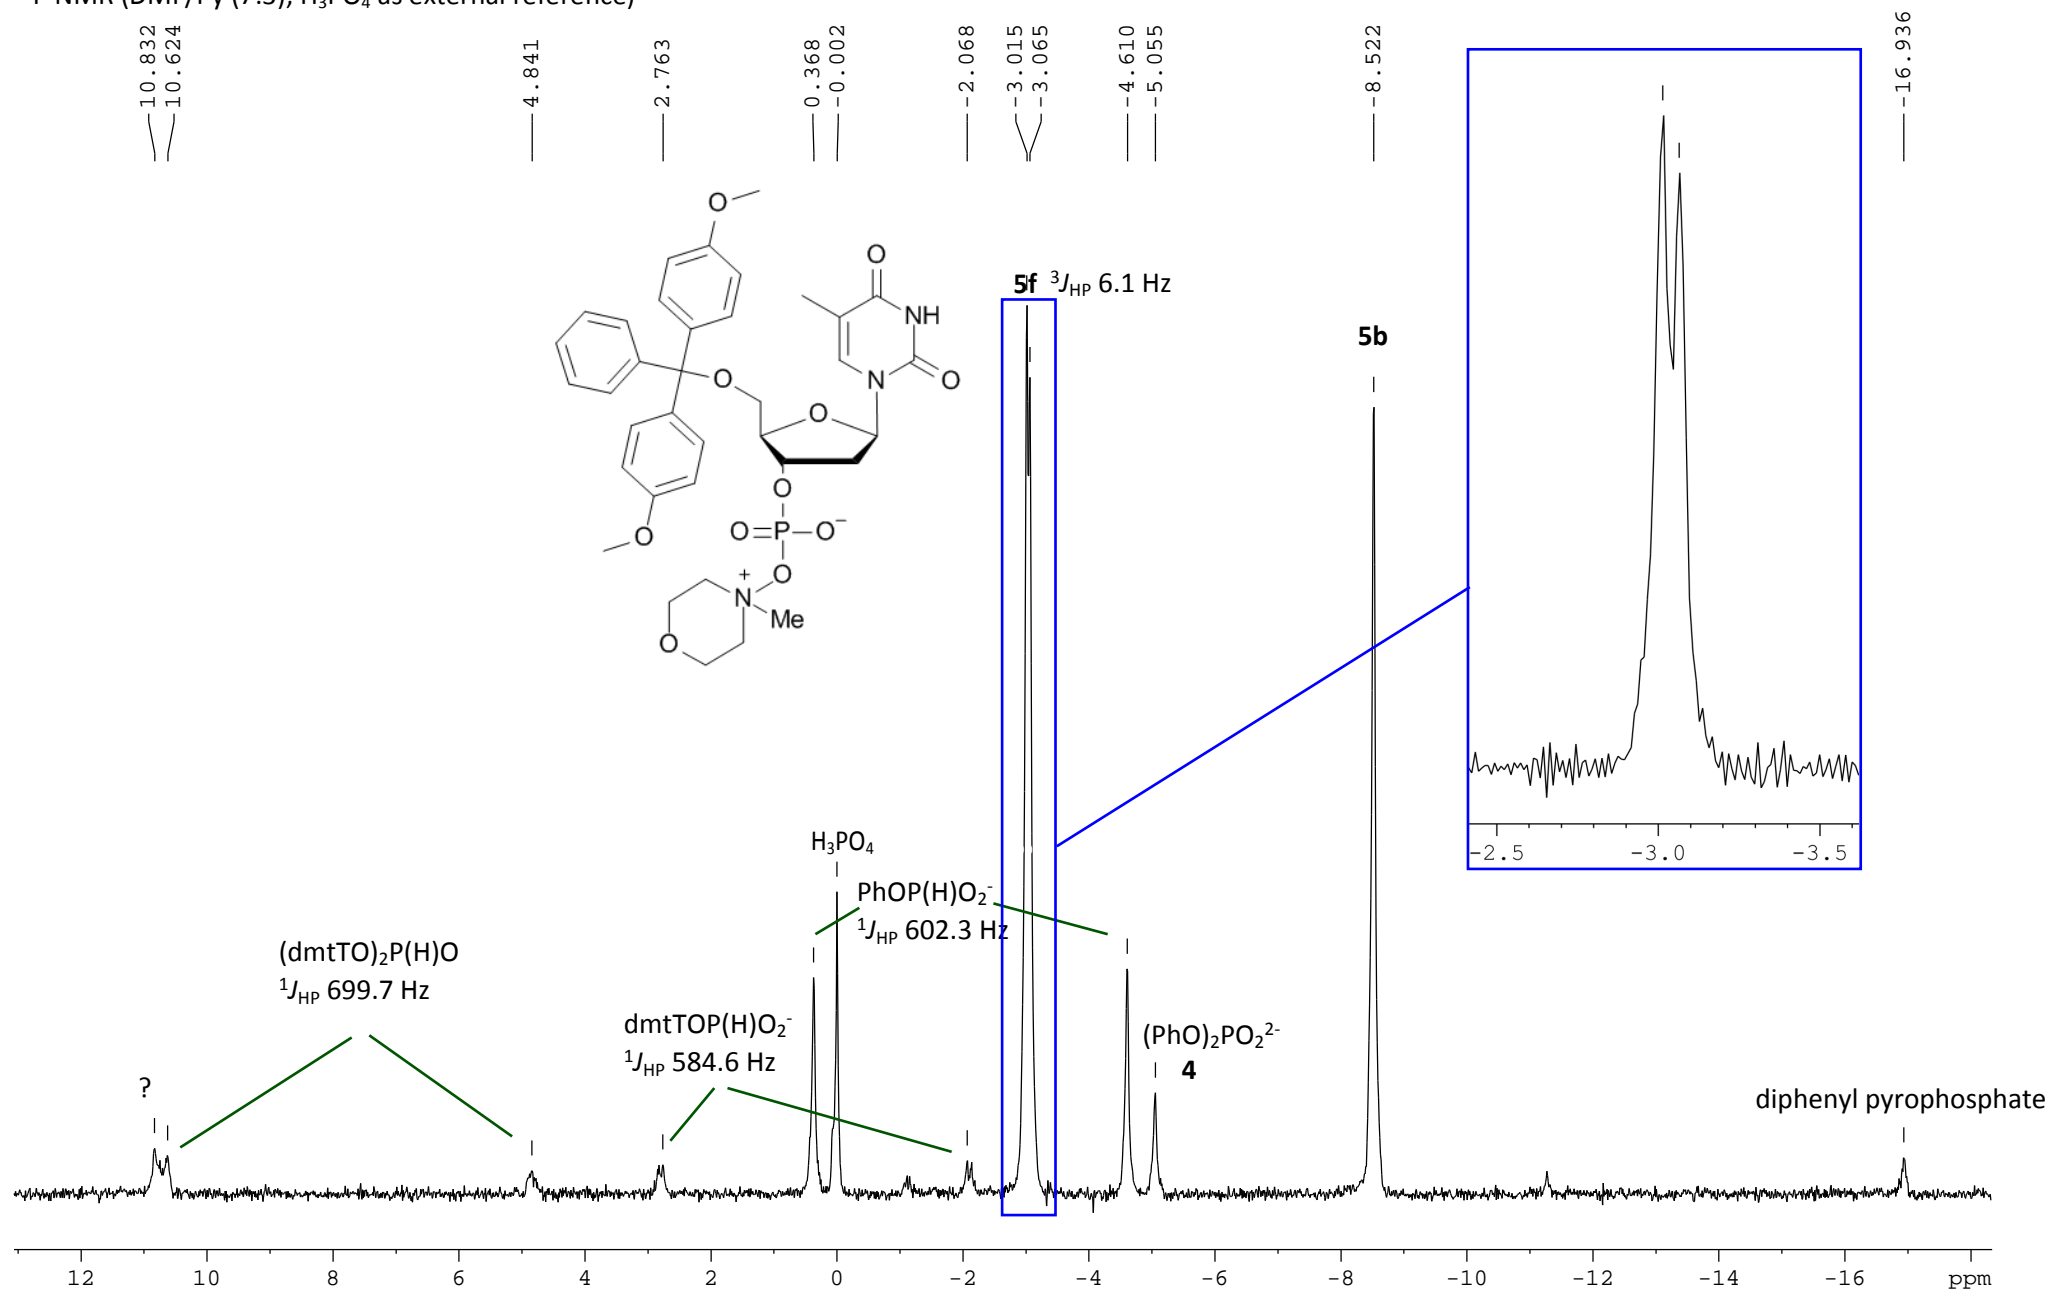

**Fig. S8b** Reaction of an *in situ* generated  $(\text{PhO})(\text{dmtTO})\text{P(H)O}$  (ca. 0.5 mmol) and the excess of  $(\text{PhO})_2\text{P(H)O}$  (ca. 0.75 mmol) with NMM *N*-oxide **3b** (3 mmol) in DMF-pyridine 7:3 (v/v).  $^{31}\text{P}$  NMR spectrum of the reaction mixture after ca. 10 min.

# 5. $^1\text{H}$ , $^{13}\text{C}$ , $^{31}\text{P}$ , $^1\text{H}$ - $^1\text{H}$ COSY, $^1\text{H}$ - $^{13}\text{C}$ HSQC NMR and MS spectra of the isolated products

4-methoxypyridin-1-ium-1-yl phenyl phosphate **5a**

$^1\text{H}$  NMR ( $\text{DMF-}d_7$ )

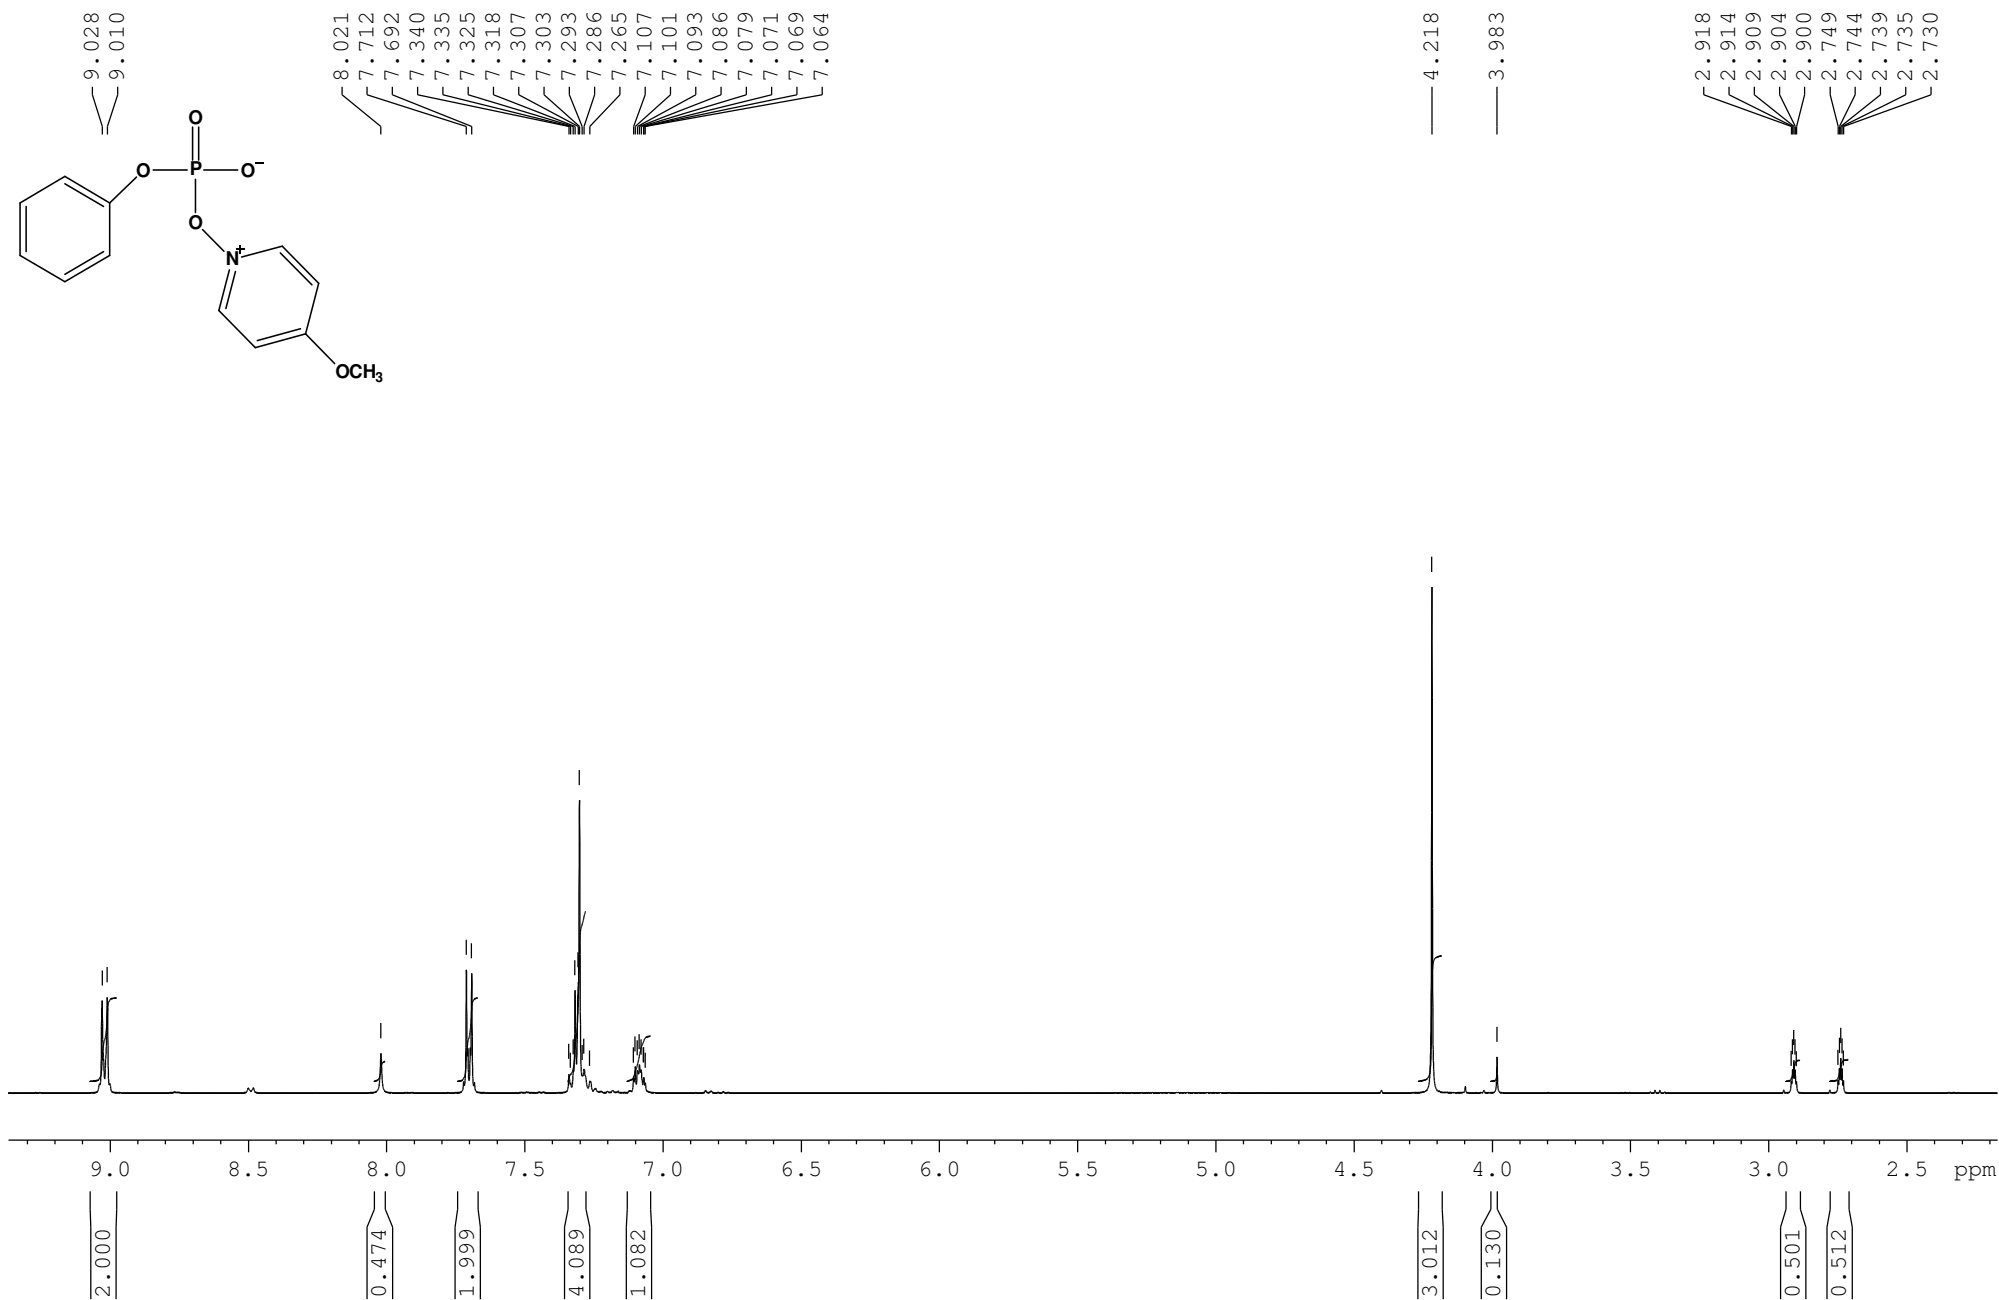

4-methoxypyridin-1-ium-1-yl phenyl phosphate **5a**

$^{13}\text{C}$  NMR (DMF- $d_7$ )

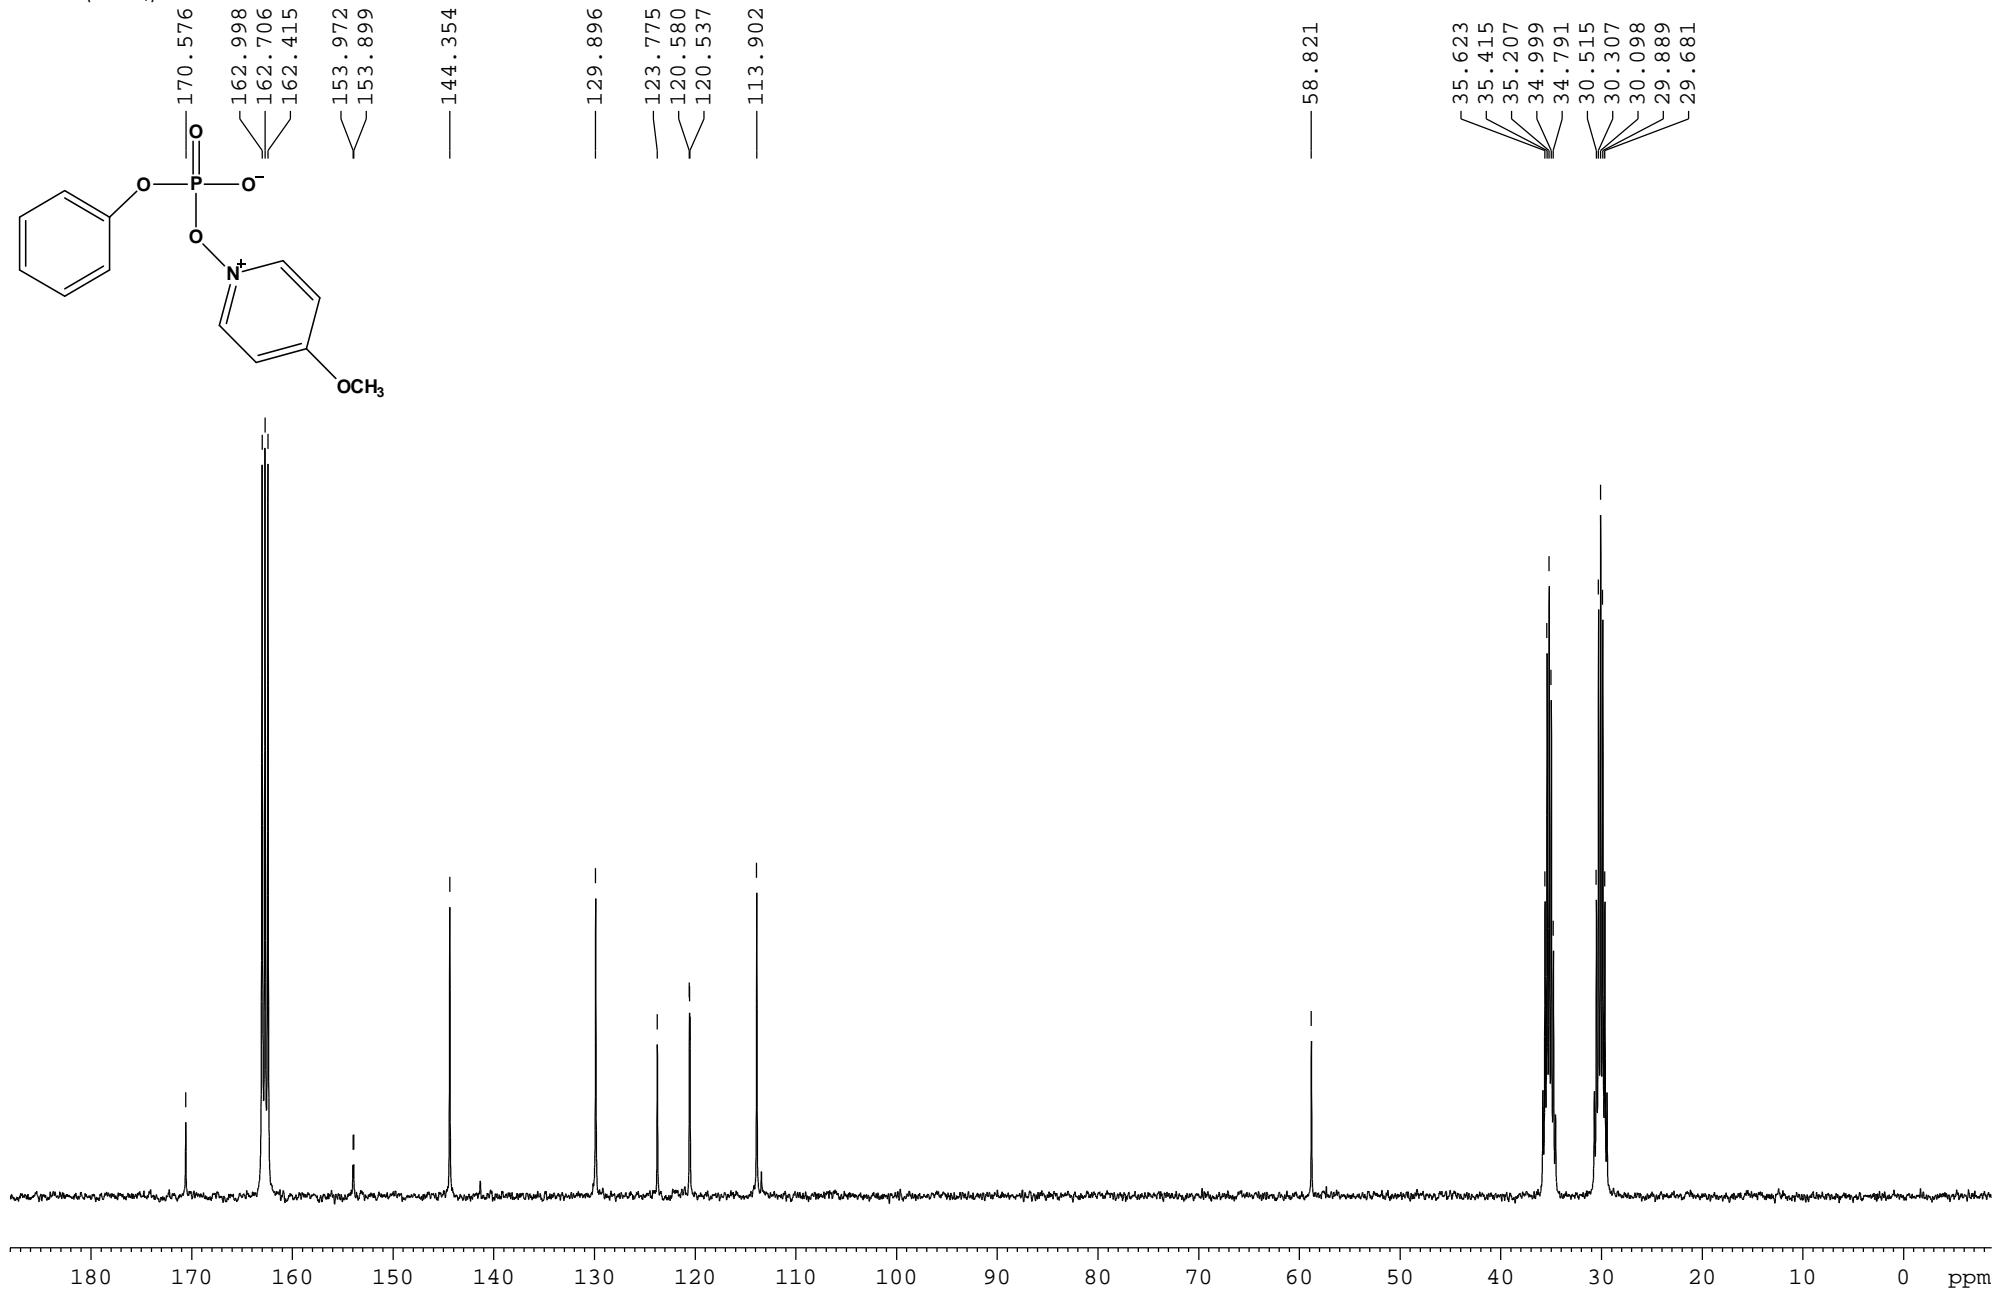

4-methoxypyridin-1-ium-1-yl phenyl phosphate **5a**

$^{31}\text{P}\{^1\text{H}\}$  NMR (DMF;  $\text{H}_3\text{PO}_4$  as external reference)

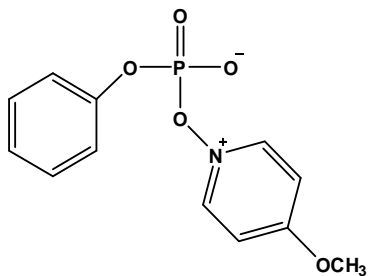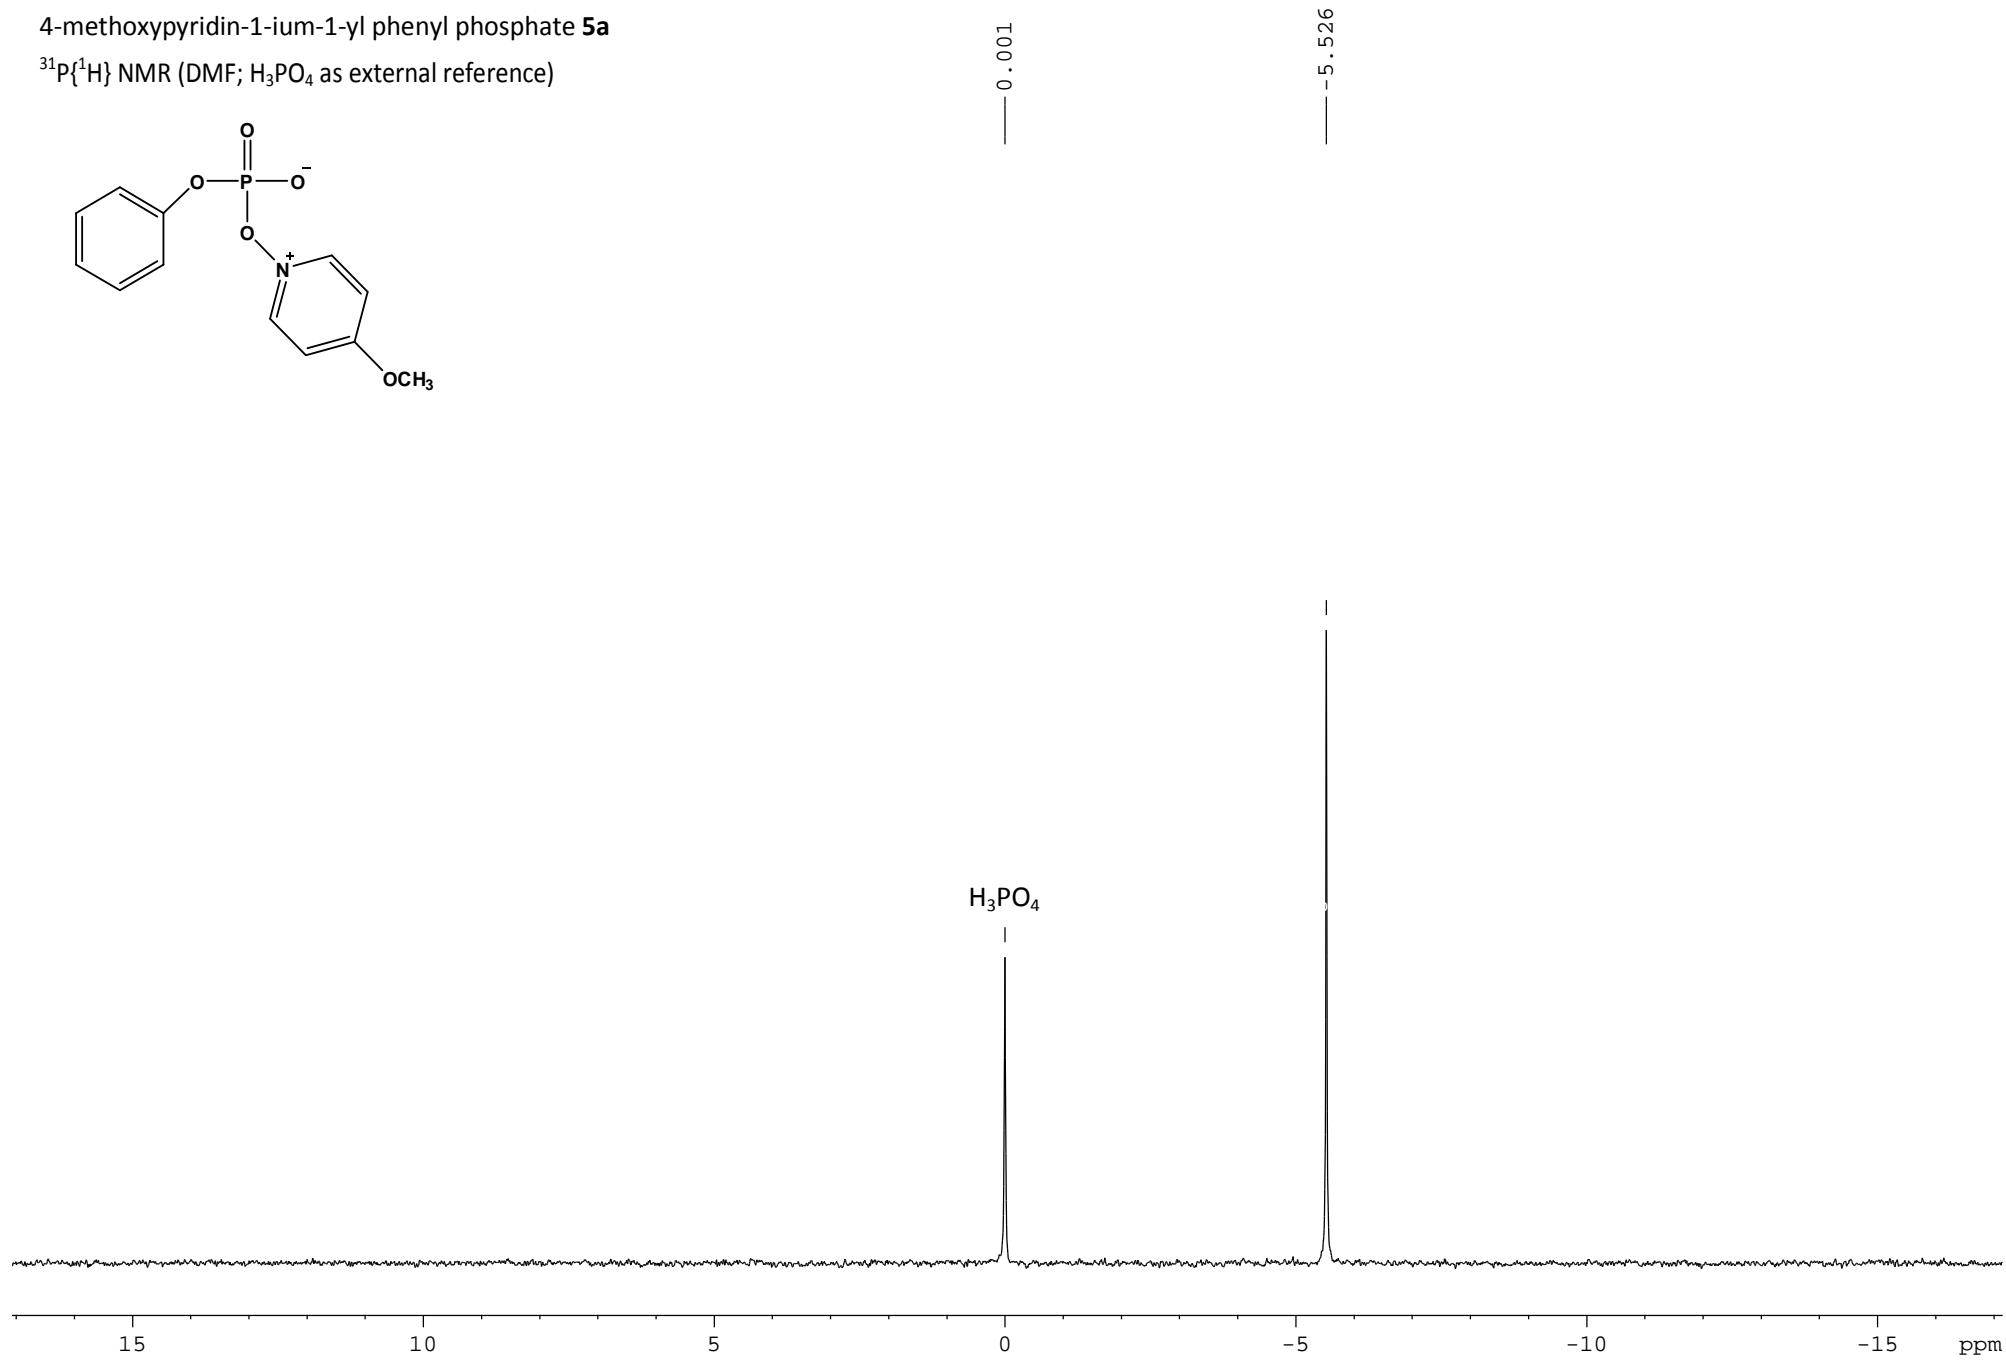

4-methoxypyridin-1-ium-1-yl phenyl phosphate **5a**

$^1\text{H}$ - $^1\text{H}$  COSY (DMF- $d_7$ )

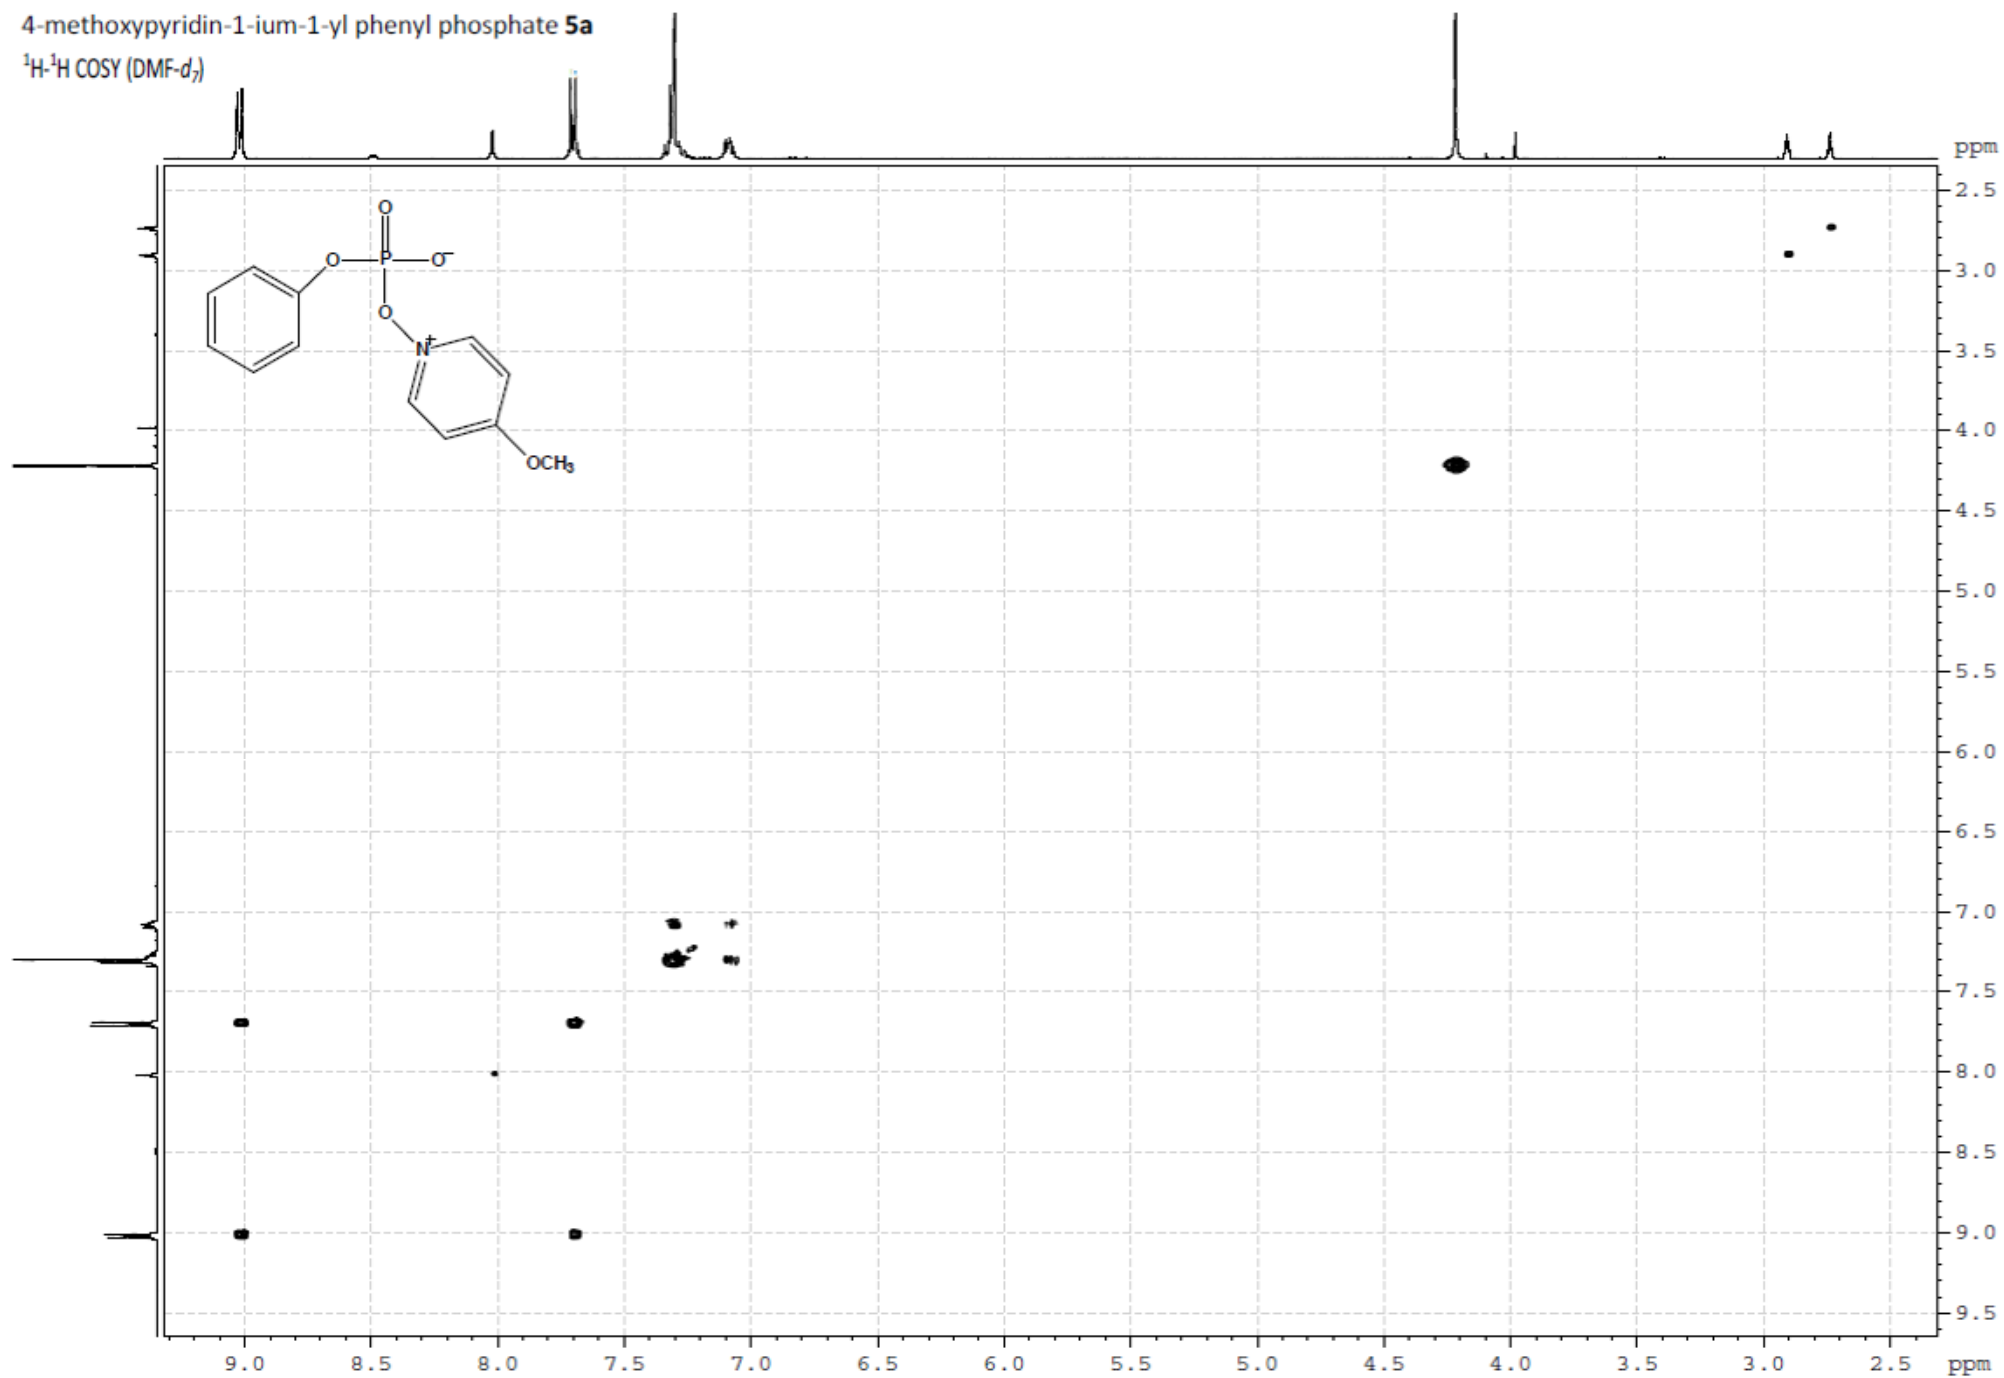

4-methoxypyridin-1-ium-1-yl phenyl phosphate **5a**

$^1\text{H}$ - $^{13}\text{C}$  HSQC (DMF- $d_7$ )

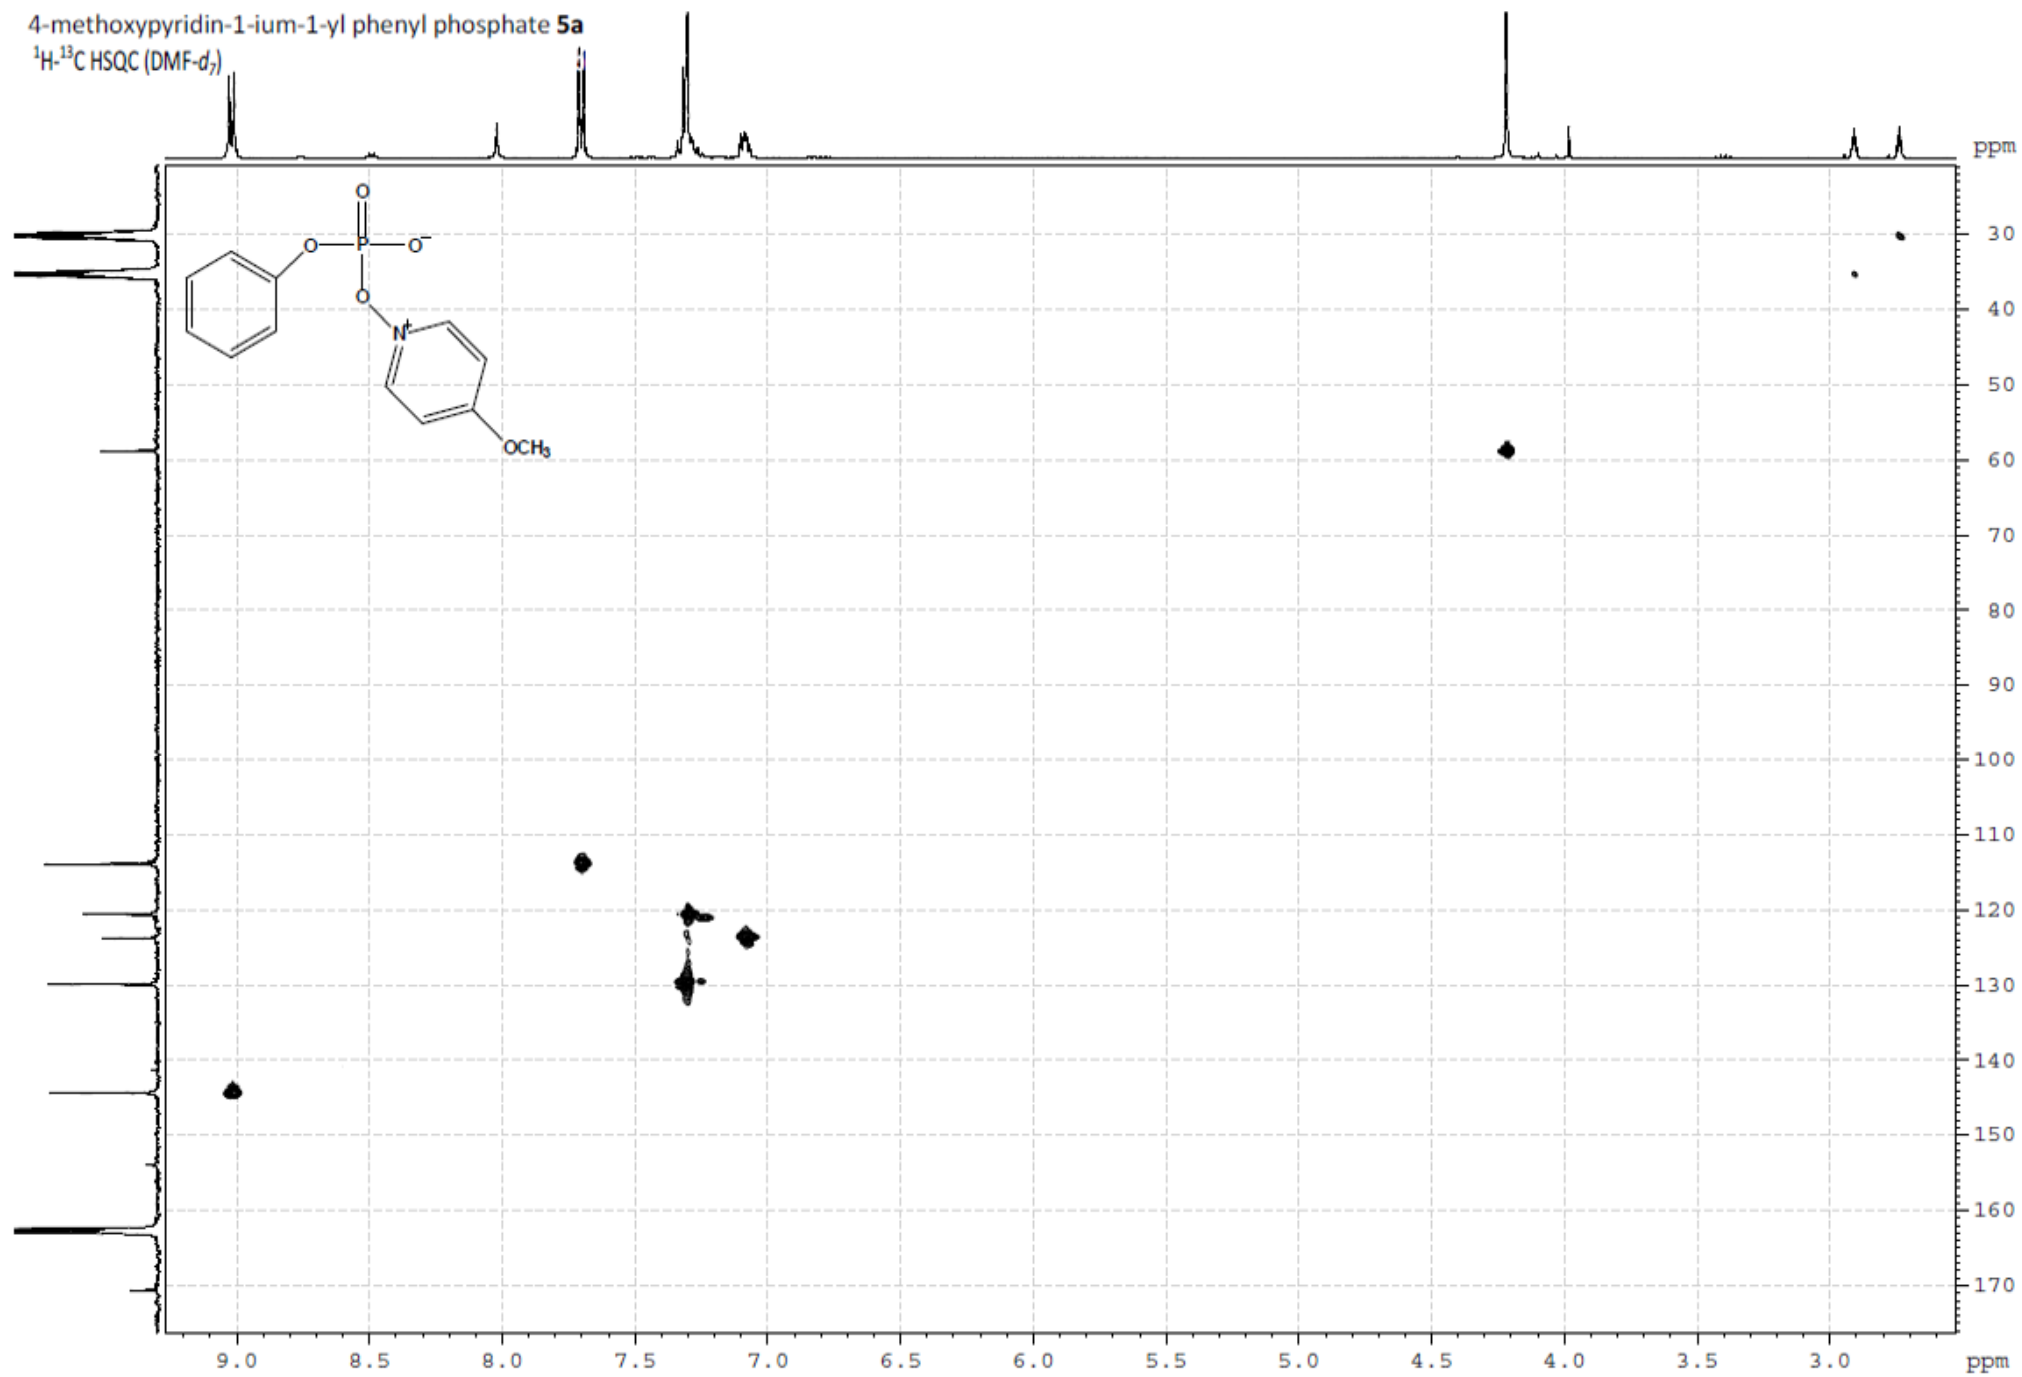



# Generic Display Report (all)

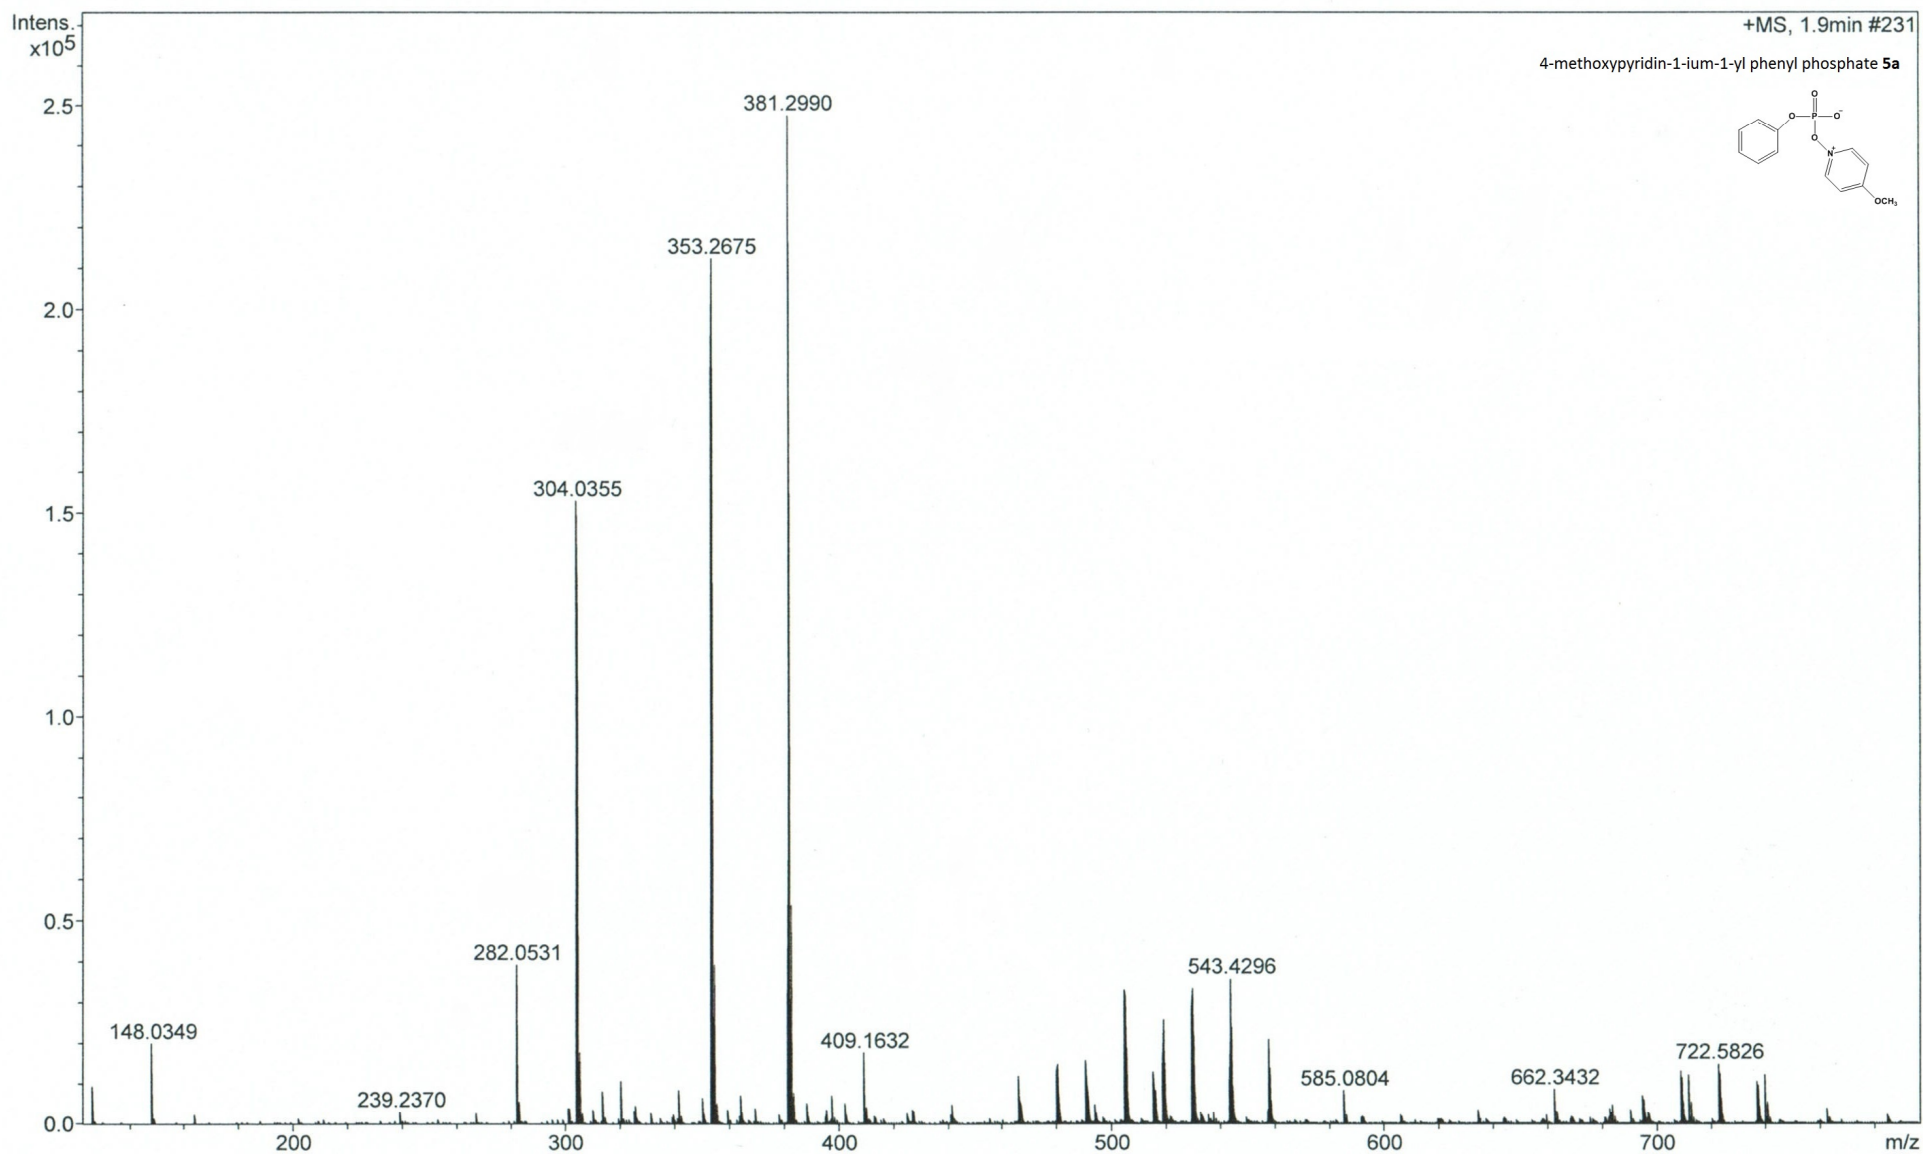

*N*-methylmorpholino-4-ium phenyl phosphate **5b**

$^1\text{H}$  NMR ( $\text{D}_2\text{O}$ )

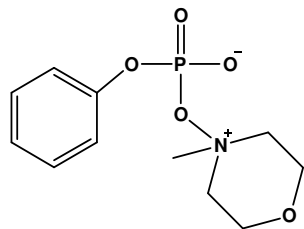

7.535  
7.516  
7.496  
7.370  
7.367  
7.351  
7.349  
7.332  
7.330  
7.321  
7.318  
7.315  
7.309  
7.299  
7.296

4.796  
4.363  
4.359  
4.330  
4.325  
4.226  
4.221  
4.199  
4.192  
4.187  
4.165  
4.160  
4.138  
4.133  
4.107  
4.103  
4.099  
4.004  
4.001  
3.995  
3.991  
3.968  
3.942

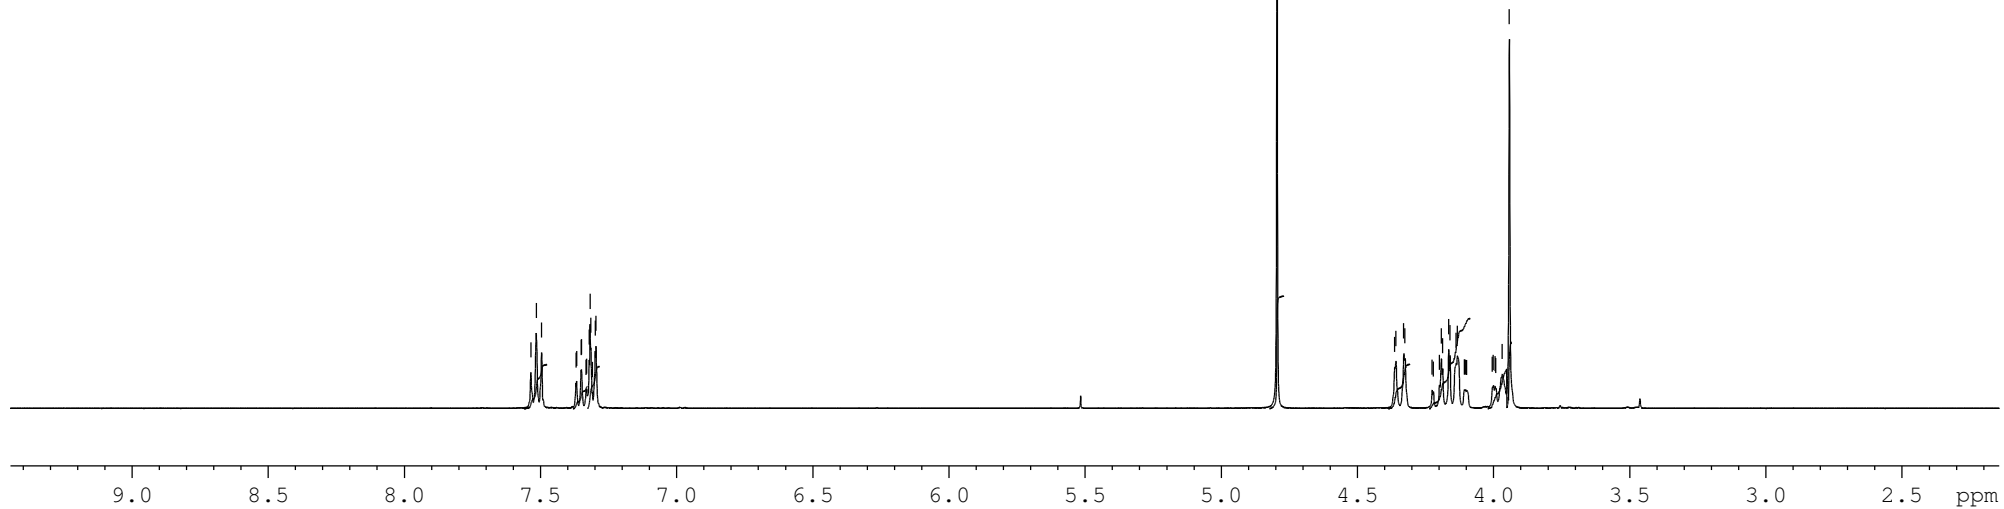

2.000  
1.012  
1.921

5.132  
2.017  
4.106  
1.979  
3.059

*N*-methylmorpholino-4-ium phenyl phosphate **5b**

$^{13}\text{C}$  NMR ( $\text{D}_2\text{O}$ )

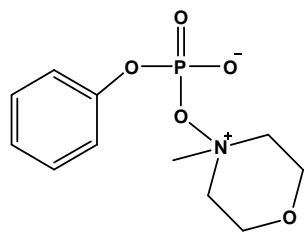

150.836  
150.756

130.037

125.356

120.035  
119.997

65.188

60.965

55.738

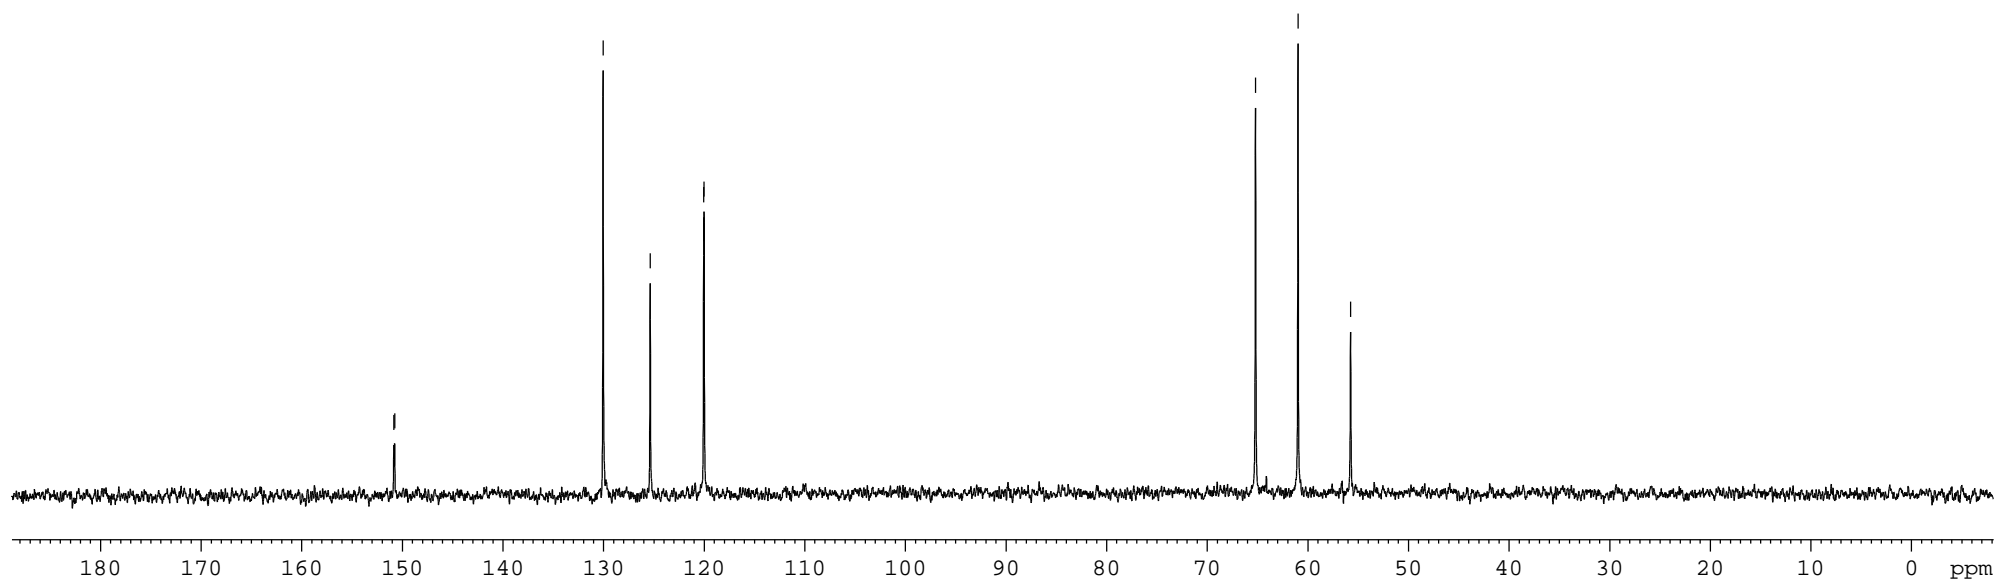

*N*-methylmorpholino-4-ium phenyl phosphate **5b**

$^{31}\text{P}\{^1\text{H}\}$  NMR ( $\text{H}_2\text{O}$ ;  $\text{H}_3\text{PO}_4$  as external reference)

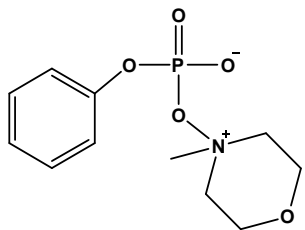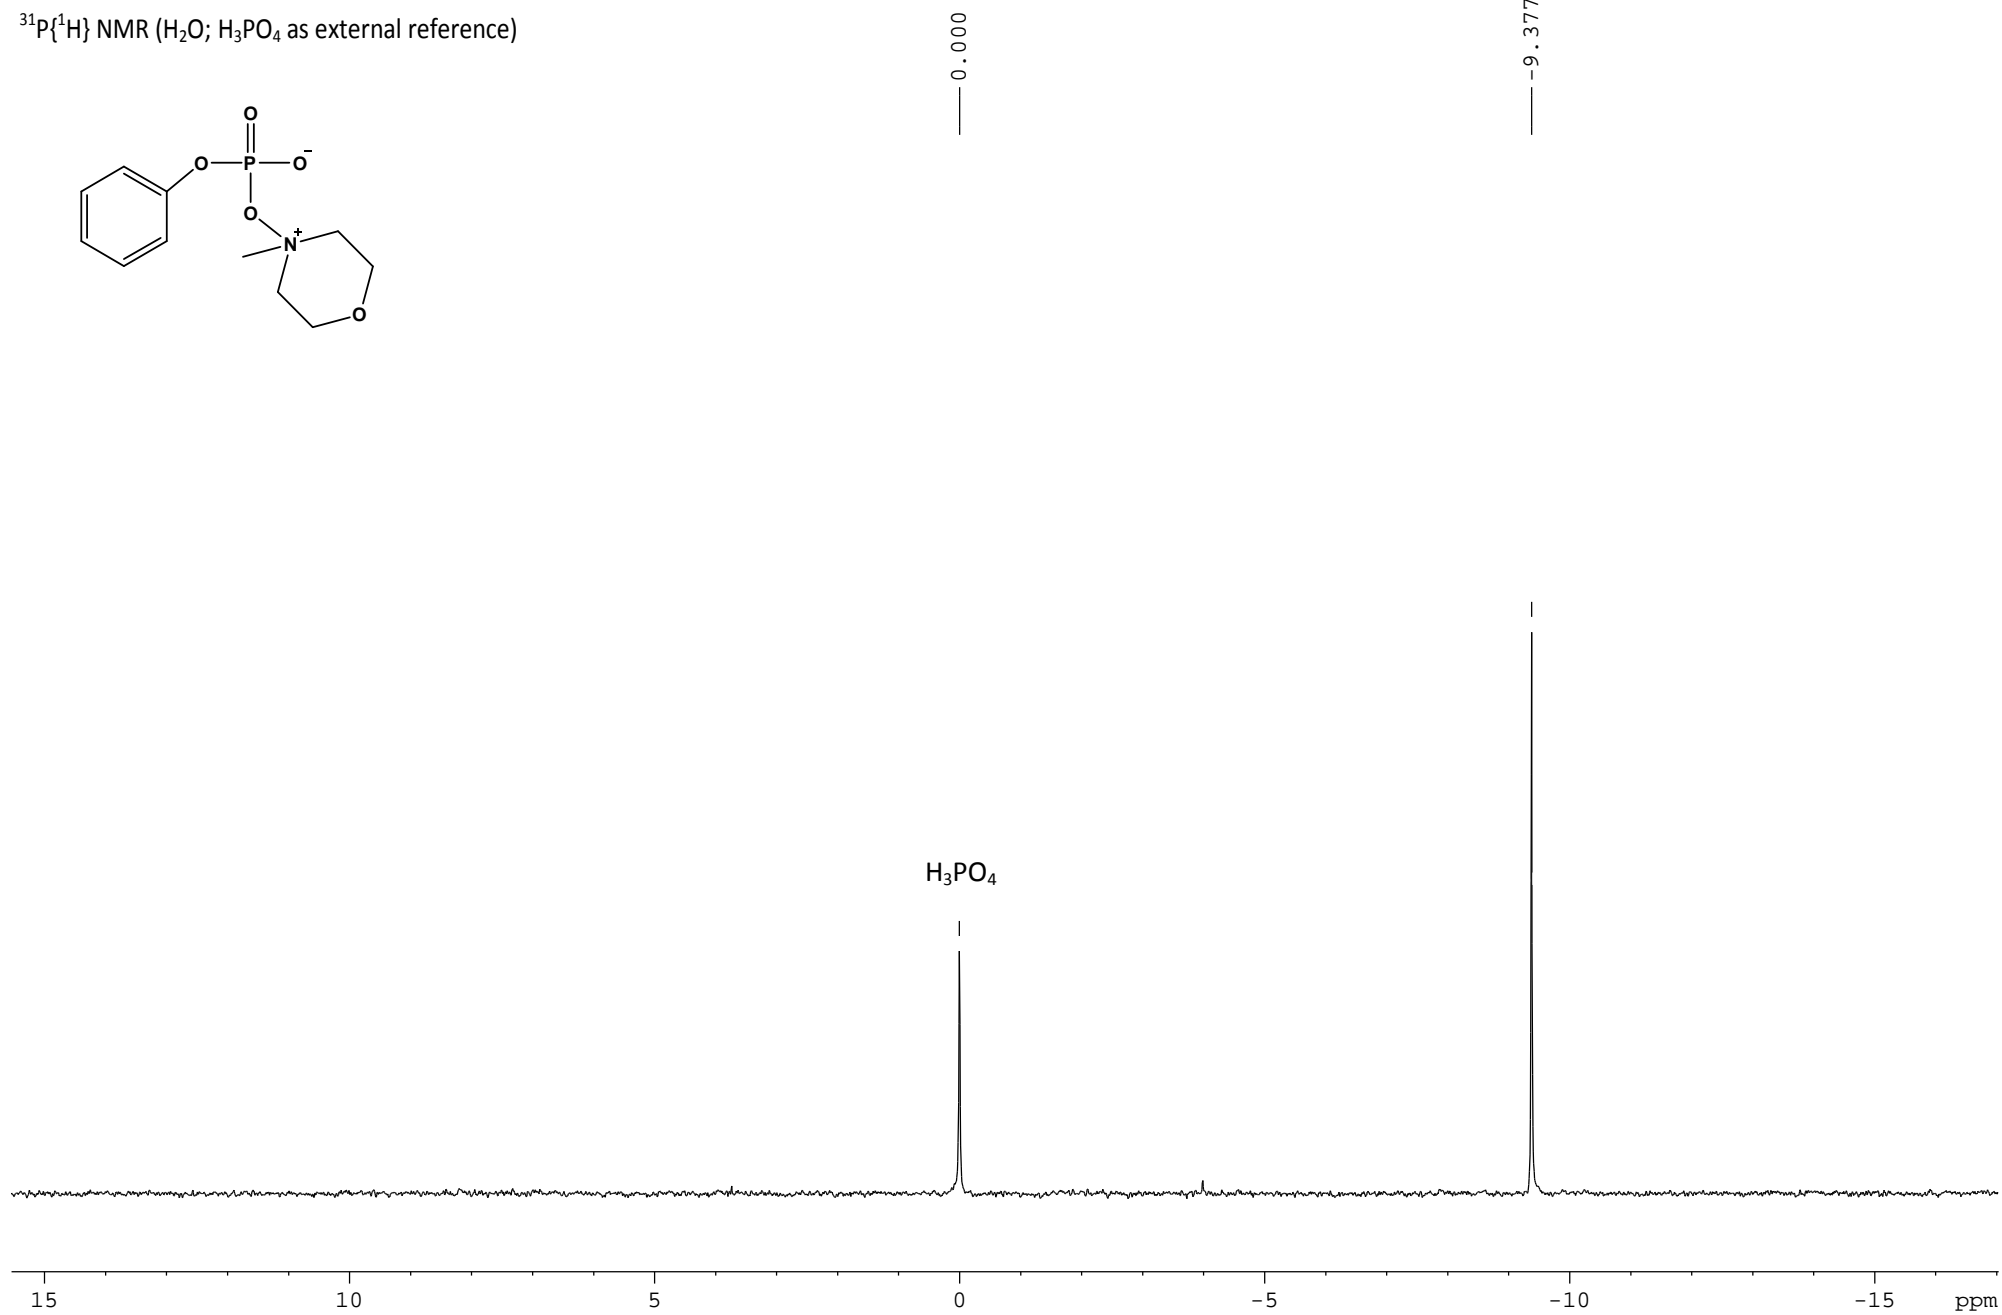

*N*-methylmorpholino-4-ium phenyl phosphate **5b**

$^1\text{H}$ - $^1\text{H}$  COSY ( $\text{D}_2\text{O}$ )

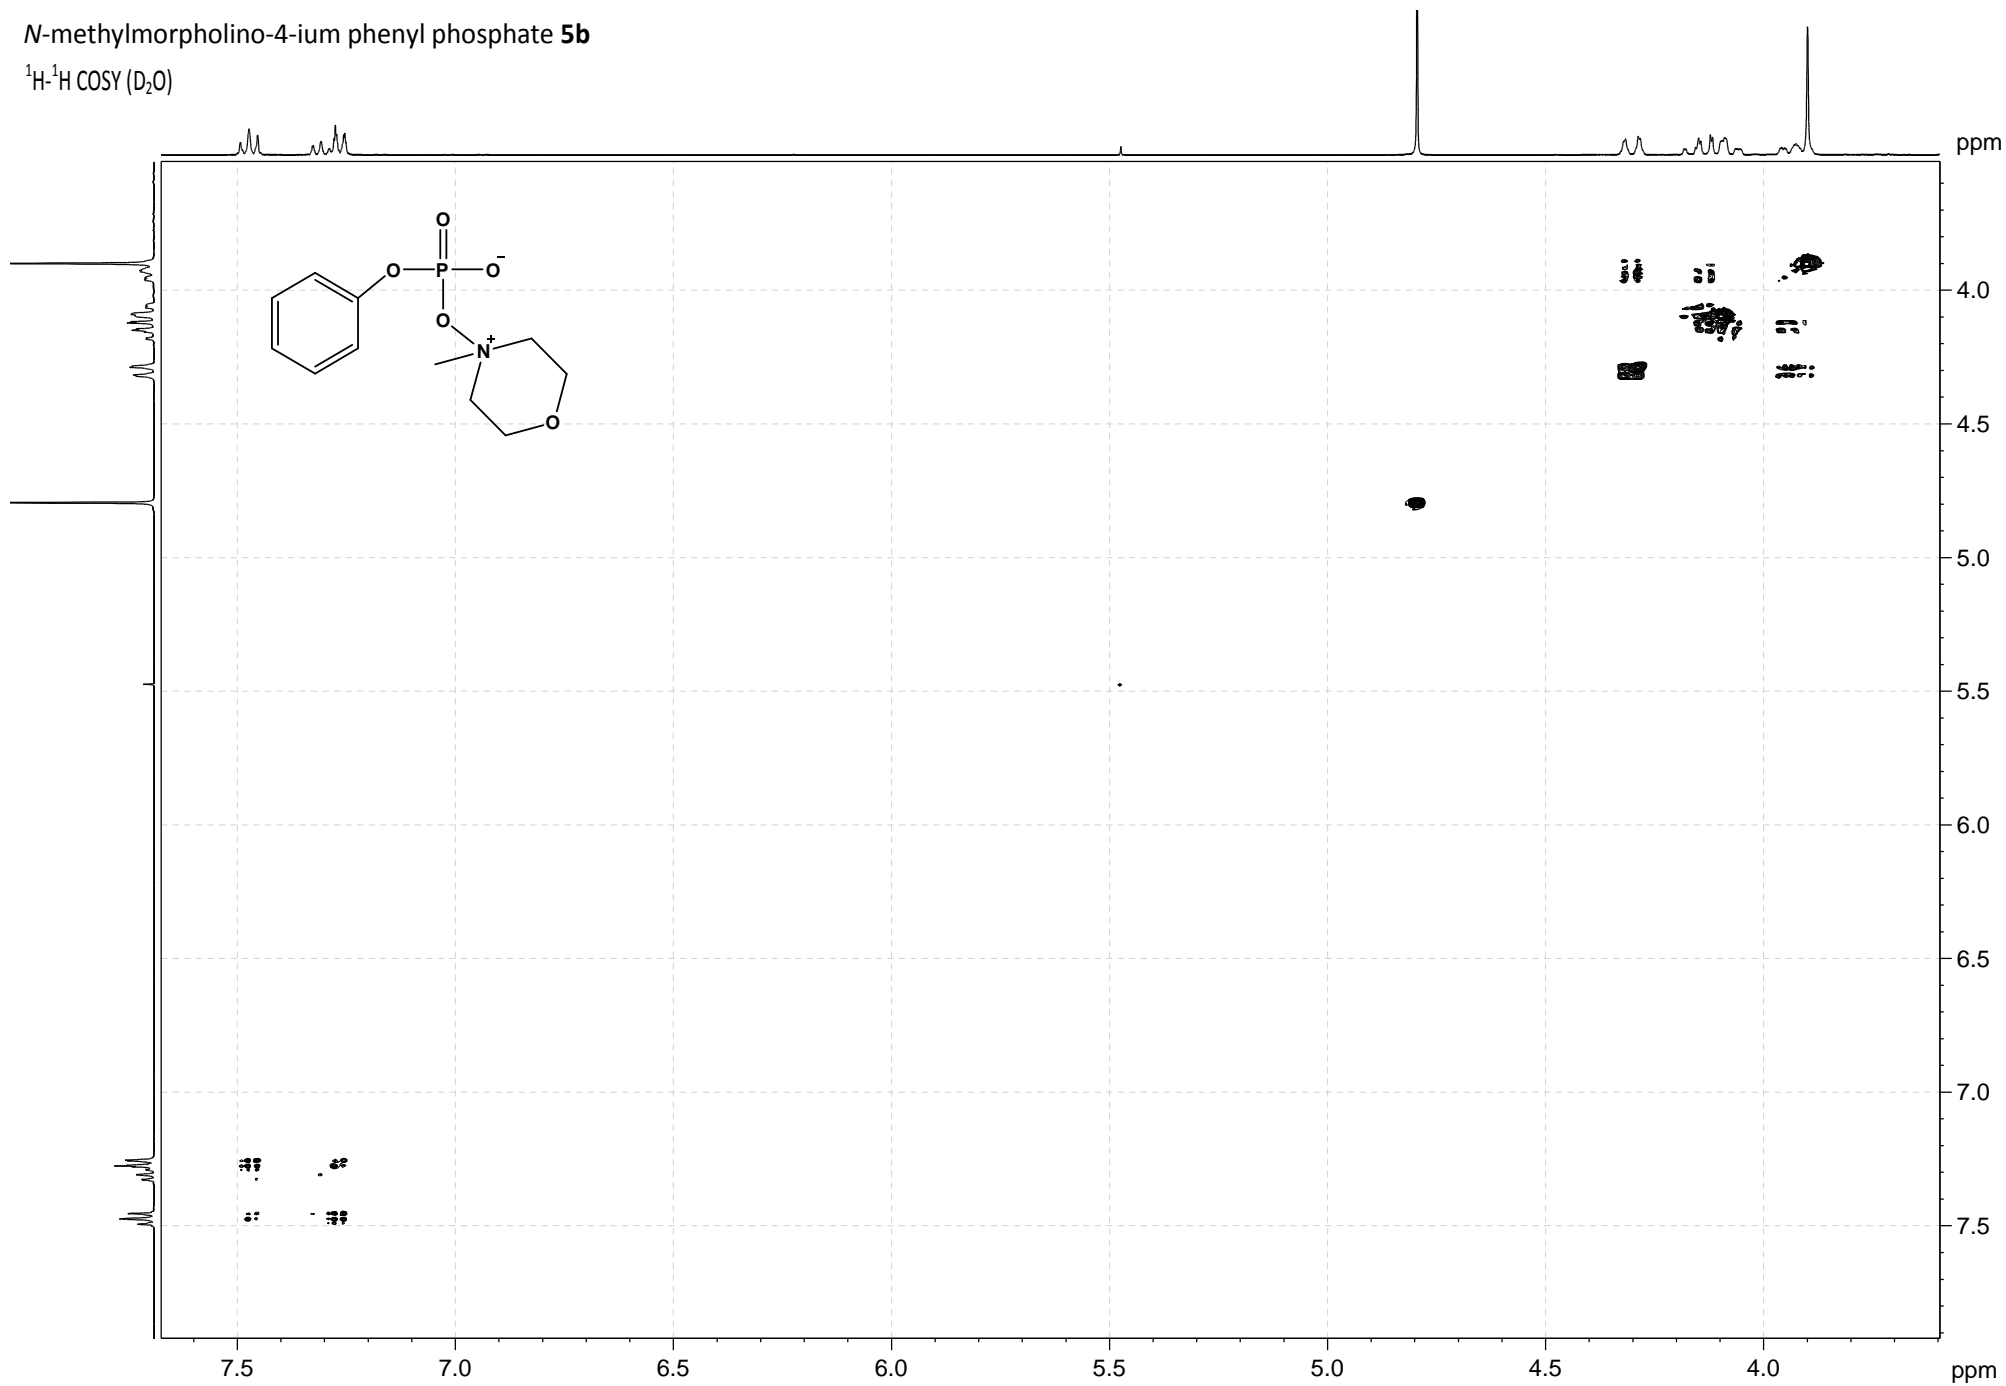

***N*-methylmorpholino-4-ium phenyl phosphate **5b****

$^1\text{H}$ - $^{13}\text{C}$  HSQC ( $\text{D}_2\text{O}$ )

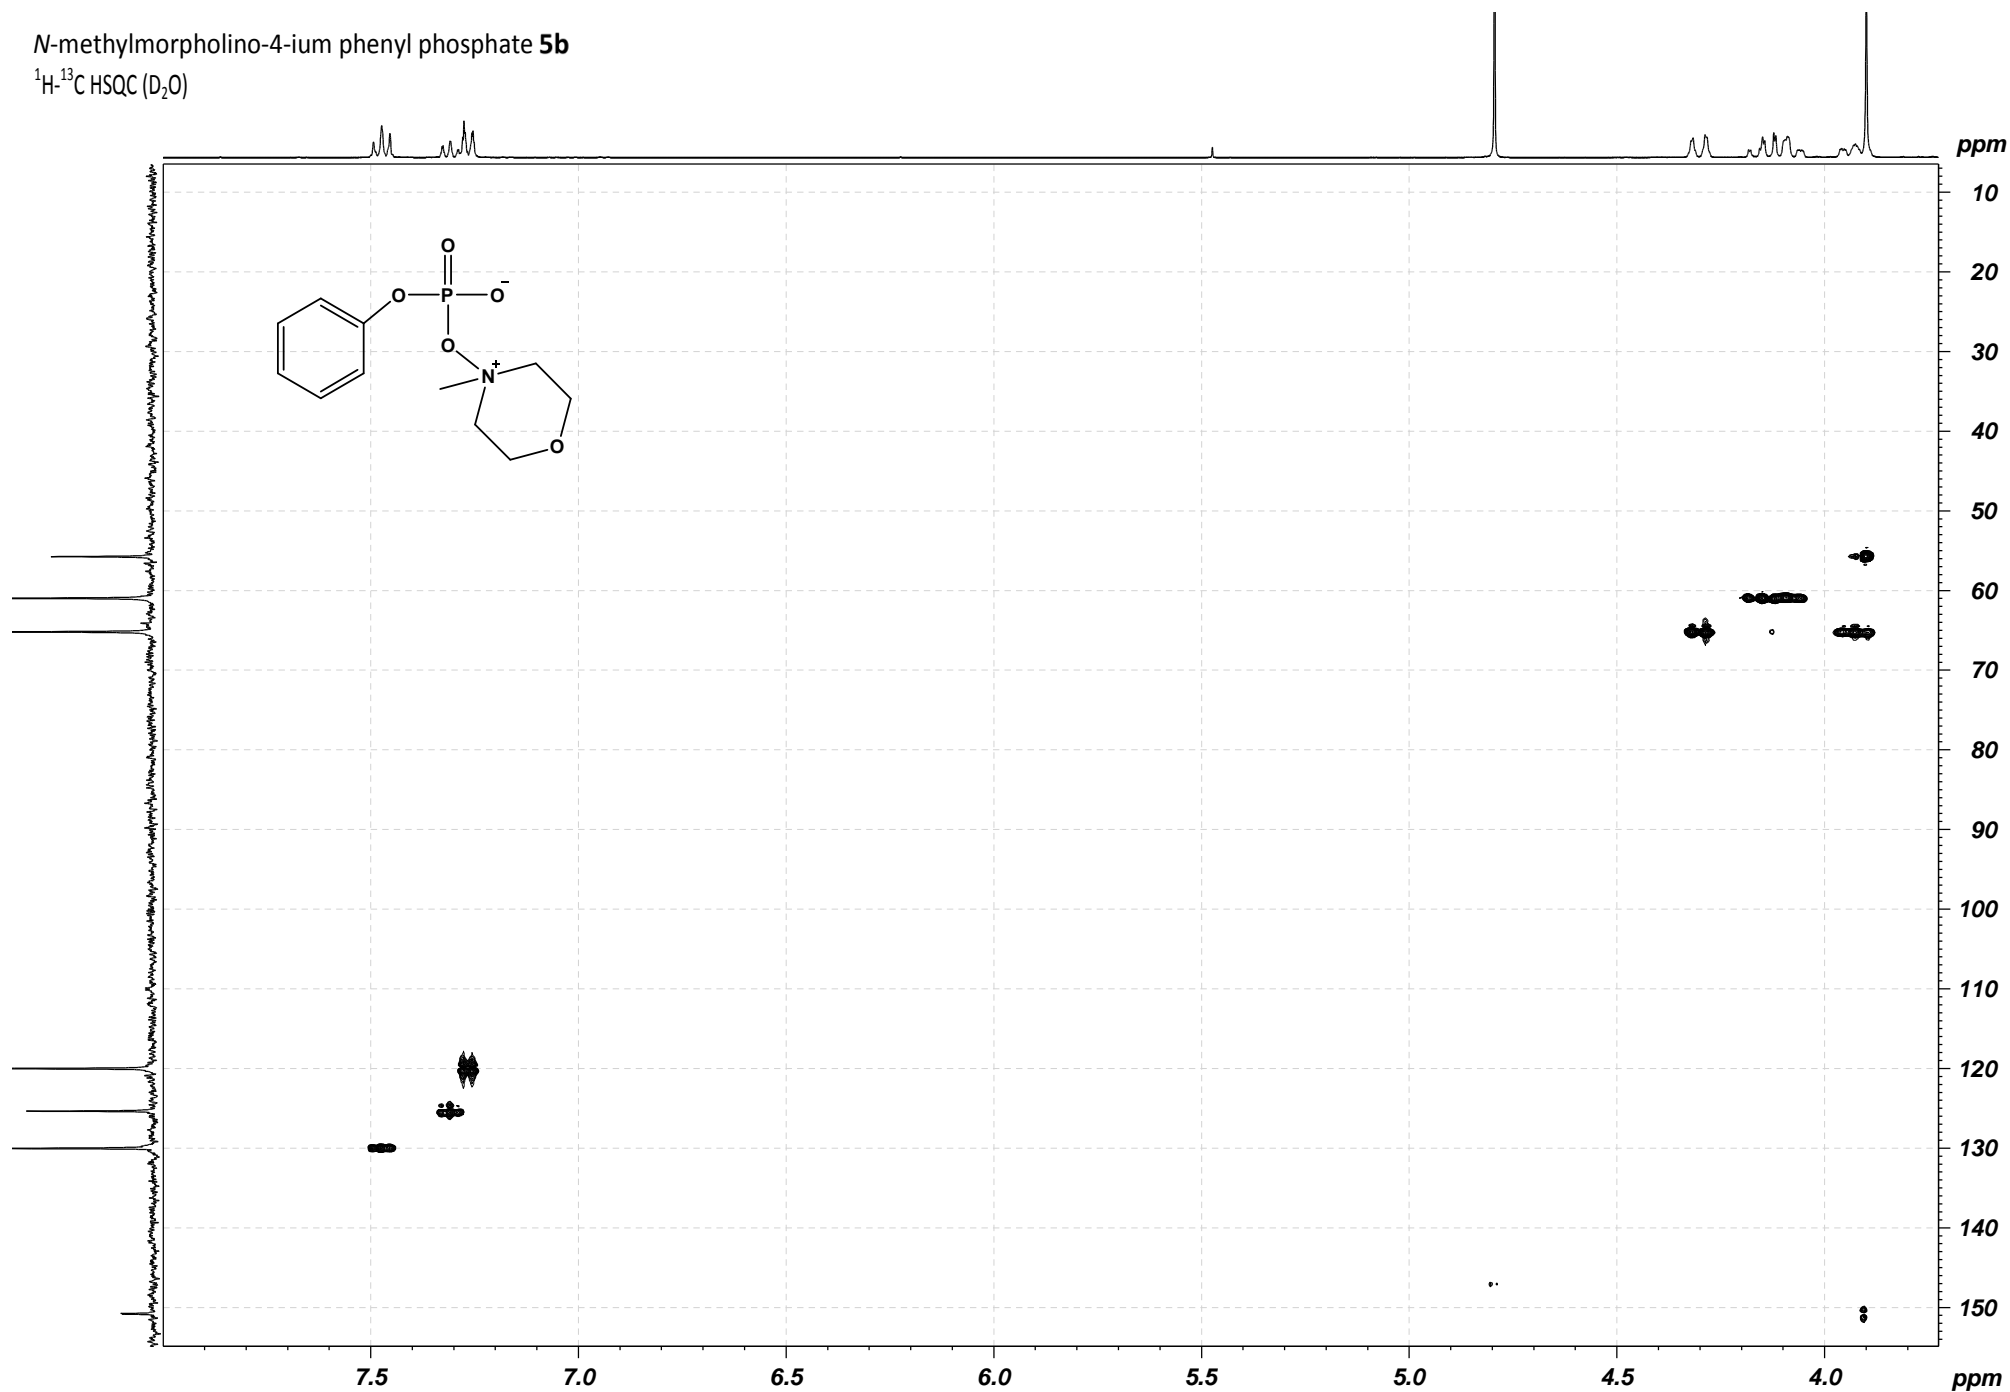

# Mass Spectrum SmartFormula Report

## Analysis Info

Analysis Name D:\Data\Basia\zlecone\15\_02\_23\_A1neg.d  
 Method ewelina.m  
 Sample Name  
 Comment

Acquisition Date 2/23/2015 11:12:55 AM

Operator Bruker Customer  
 Instrument / Ser# micrOTOF-Q 128

## Acquisition Parameter

|             |            |                       |           |                  |           |
|-------------|------------|-----------------------|-----------|------------------|-----------|
| Source Type | ESI        | Ion Polarity          | Negative  | Set Nebulizer    | 0.4 Bar   |
| Focus       | Not active | Set Capillary         | 3200 V    | Set Dry Heater   | 220 °C    |
| Scan Begin  | 100 m/z    | Set End Plate Offset  | -500 V    | Set Dry Gas      | 4.0 l/min |
| Scan End    | 1200 m/z   | Set Collision Cell RF | 200.0 Vpp | Set Divert Valve | Source    |

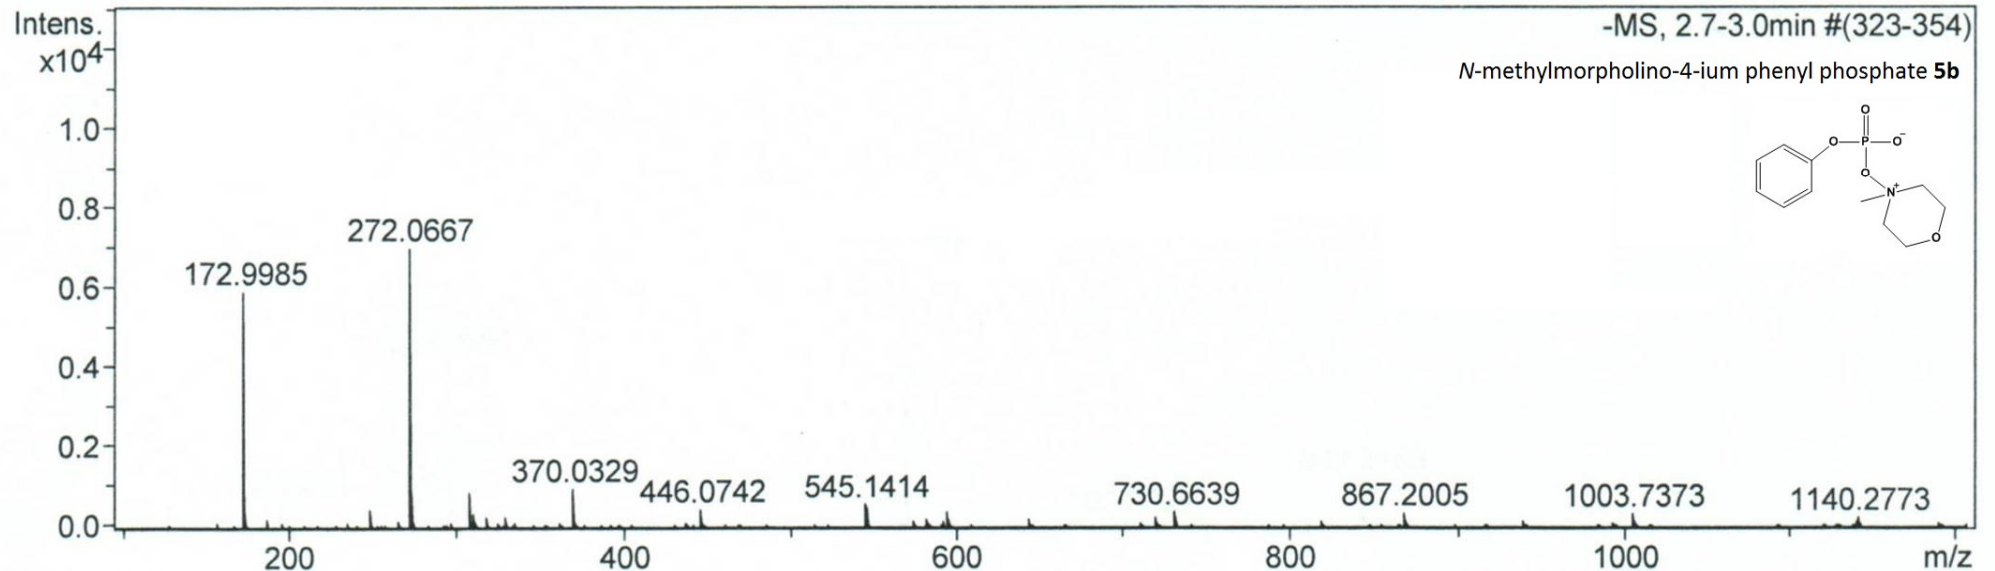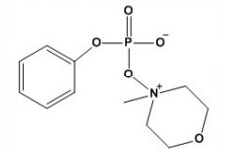

| Meas<br>m/z | # | Form<br>ula | m/z       | err<br>[ppm] | Mean<br>err<br>[ppm] | rdb | N-Ru<br>le | e <sup>-</sup><br>Conf | mSig<br>ma | Std I | Std<br>Mean<br>m/z | Std I<br>VarN<br>orm | Std<br>m/z<br>Diff | Std<br>Com<br>b<br>Dev |
|-------------|---|-------------|-----------|--------------|----------------------|-----|------------|------------------------|------------|-------|--------------------|----------------------|--------------------|------------------------|
| 172.9985    |   |             | 172.9985  |              |                      |     |            |                        |            |       |                    |                      |                    |                        |
| 272.0667    |   |             | 272.0667  |              |                      |     |            |                        |            |       |                    |                      |                    |                        |
| 370.0329    |   |             | 370.0329  |              |                      |     |            |                        |            |       |                    |                      |                    |                        |
| 446.0742    |   |             | 446.0742  |              |                      |     |            |                        |            |       |                    |                      |                    |                        |
| 545.1414    |   |             | 545.1414  |              |                      |     |            |                        |            |       |                    |                      |                    |                        |
| 730.6639    |   |             | 730.6639  |              |                      |     |            |                        |            |       |                    |                      |                    |                        |
| 867.2005    |   |             | 867.2005  |              |                      |     |            |                        |            |       |                    |                      |                    |                        |
| 1003.7373   |   |             | 1003.7373 |              |                      |     |            |                        |            |       |                    |                      |                    |                        |
| 1140.2773   |   |             | 1140.2773 |              |                      |     |            |                        |            |       |                    |                      |                    |                        |

# Mass Spectrum SmartFormula Report

## Analysis Info

Analysis Name D:\Data\Basia\zlecone\15\_02\_23\_A1pos.d  
 Method ewelina.m  
 Sample Name  
 Comment

Acquisition Date 2/23/2015 10:51:18 AM

Operator Bruker Customer  
 Instrument / Ser# micrOTOF-Q 128

## Acquisition Parameter

|             |            |                       |           |                  |           |
|-------------|------------|-----------------------|-----------|------------------|-----------|
| Source Type | ESI        | Ion Polarity          | Positive  | Set Nebulizer    | 0.4 Bar   |
| Focus       | Not active | Set Capillary         | 4500 V    | Set Dry Heater   | 220 °C    |
| Scan Begin  | 100 m/z    | Set End Plate Offset  | -500 V    | Set Dry Gas      | 4.0 l/min |
| Scan End    | 1200 m/z   | Set Collision Cell RF | 200.0 Vpp | Set Divert Valve | Source    |

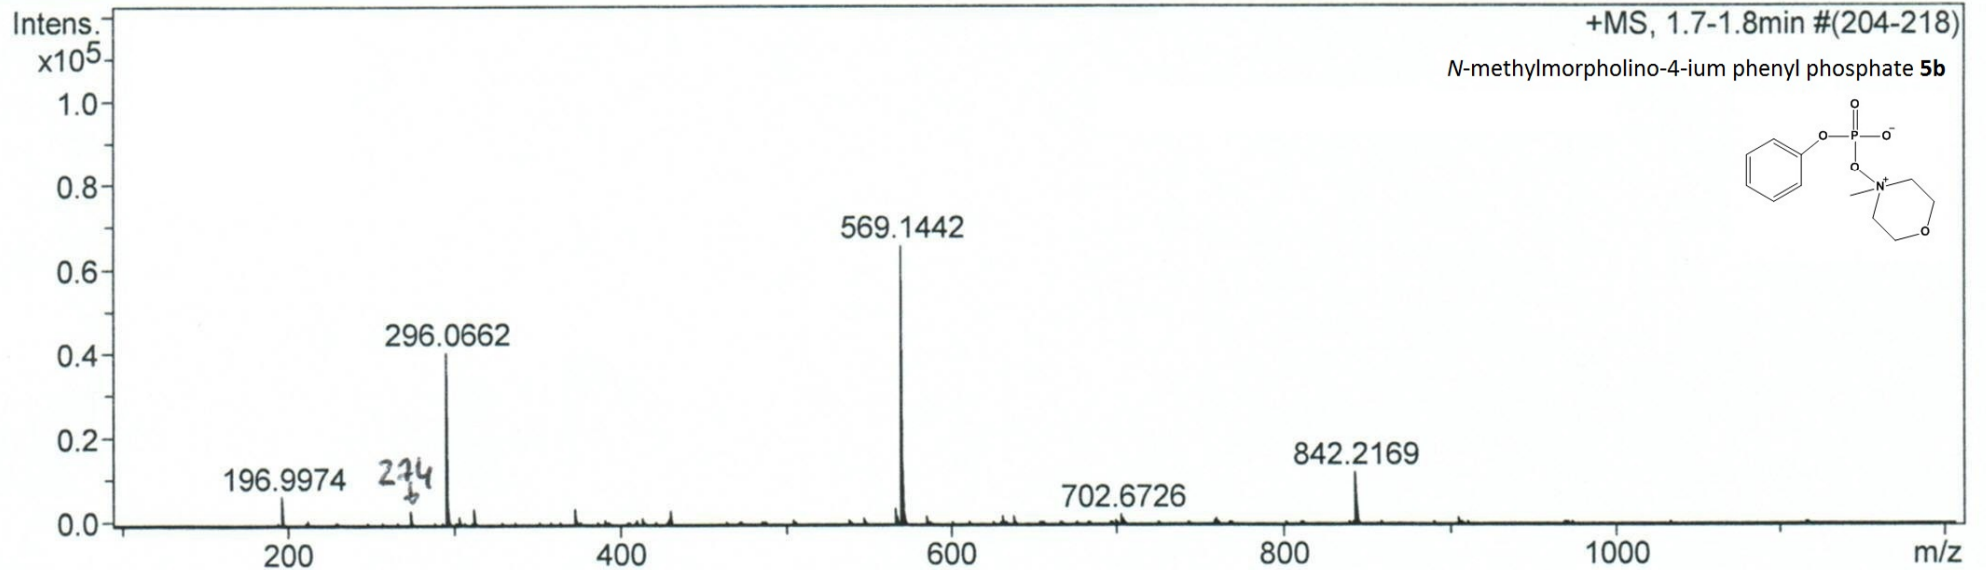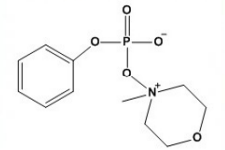

| Meas<br>m/z | # | Form<br>ula | m/z | err<br>[ppm] | Mean<br>err<br>[ppm] | rdb | N-Ru<br>le | e <sup>-</sup><br>Conf | mSig<br>ma | Std I | Std<br>Mean<br>m/z | Std I<br>VarN<br>orm | Std<br>m/z<br>Diff | Std<br>Com<br>b<br>Dev |
|-------------|---|-------------|-----|--------------|----------------------|-----|------------|------------------------|------------|-------|--------------------|----------------------|--------------------|------------------------|
|-------------|---|-------------|-----|--------------|----------------------|-----|------------|------------------------|------------|-------|--------------------|----------------------|--------------------|------------------------|



4-(dimethylamino)pyridin-1-ium-1-yl phenyl phosphate **5d**

$^1\text{H}$  NMR ( $\text{D}_2\text{O}$ )

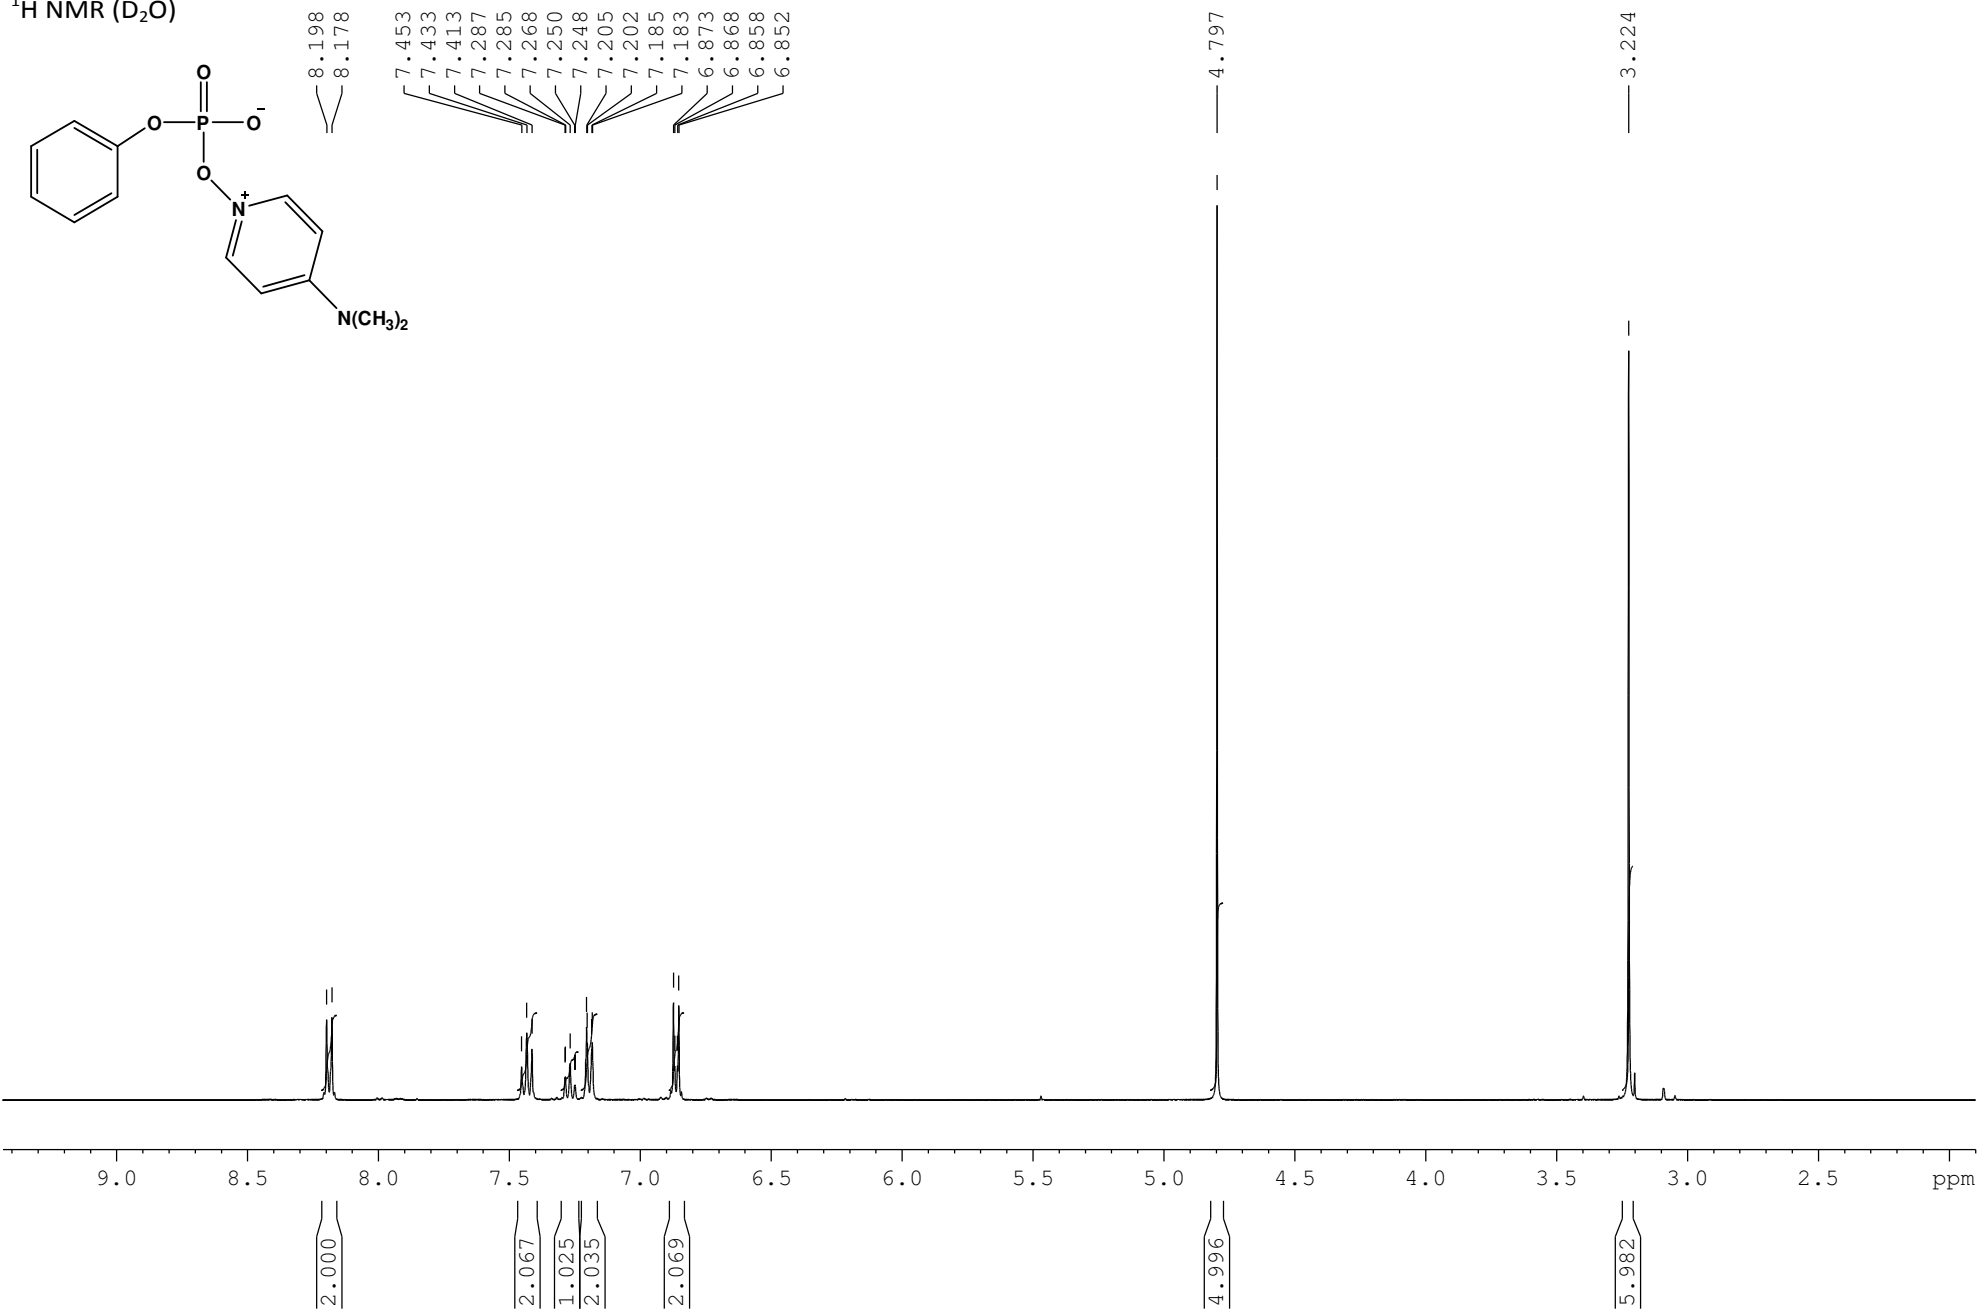

4-(dimethylamino)pyridin-1-ium-1-yl phenyl phosphate **5d**

$^{13}\text{C}$  NMR ( $\text{D}_2\text{O}$ )

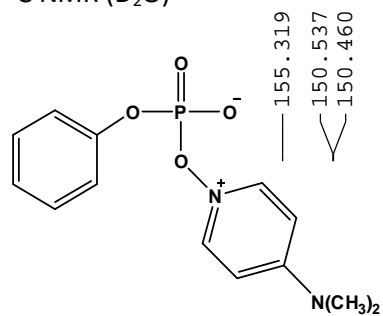

155.319  
150.537  
150.460

138.046

129.559

124.664

119.295  
119.248

106.478

39.288

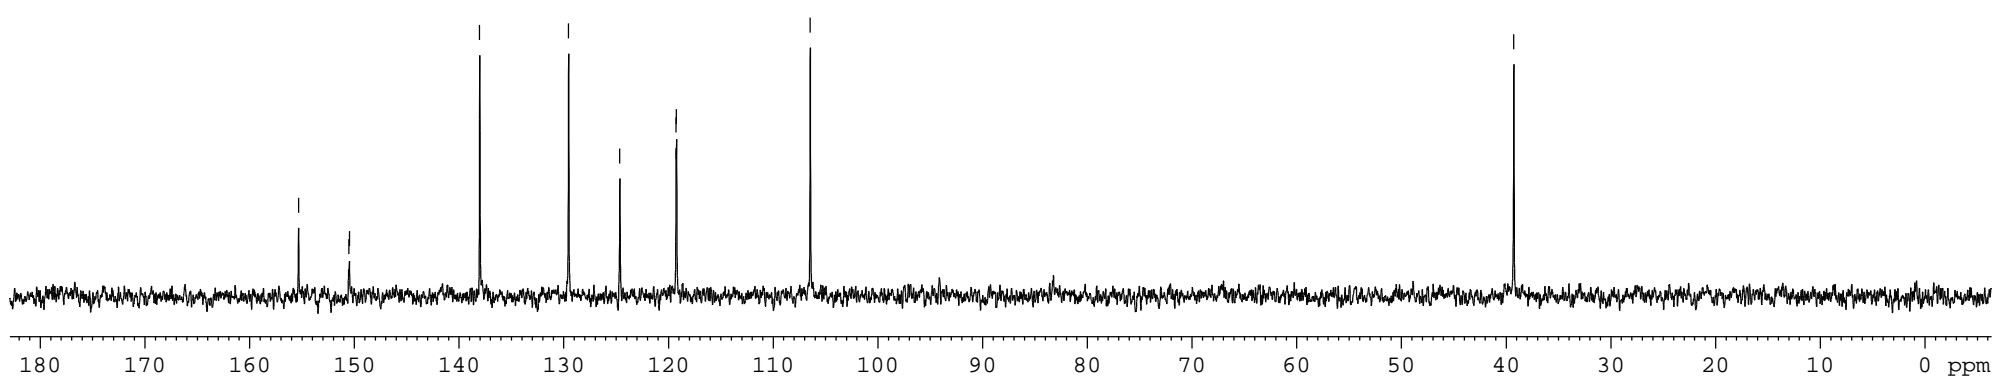

4-(dimethylamino)pyridin-1-ium-1-yl phenyl phosphate **5d**

$^{31}\text{P}\{^1\text{H}\}$  NMR ( $\text{H}_2\text{O}$ ;  $\text{H}_3\text{PO}_4$  as external reference)

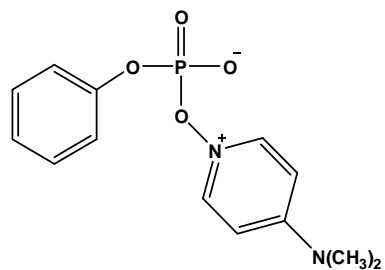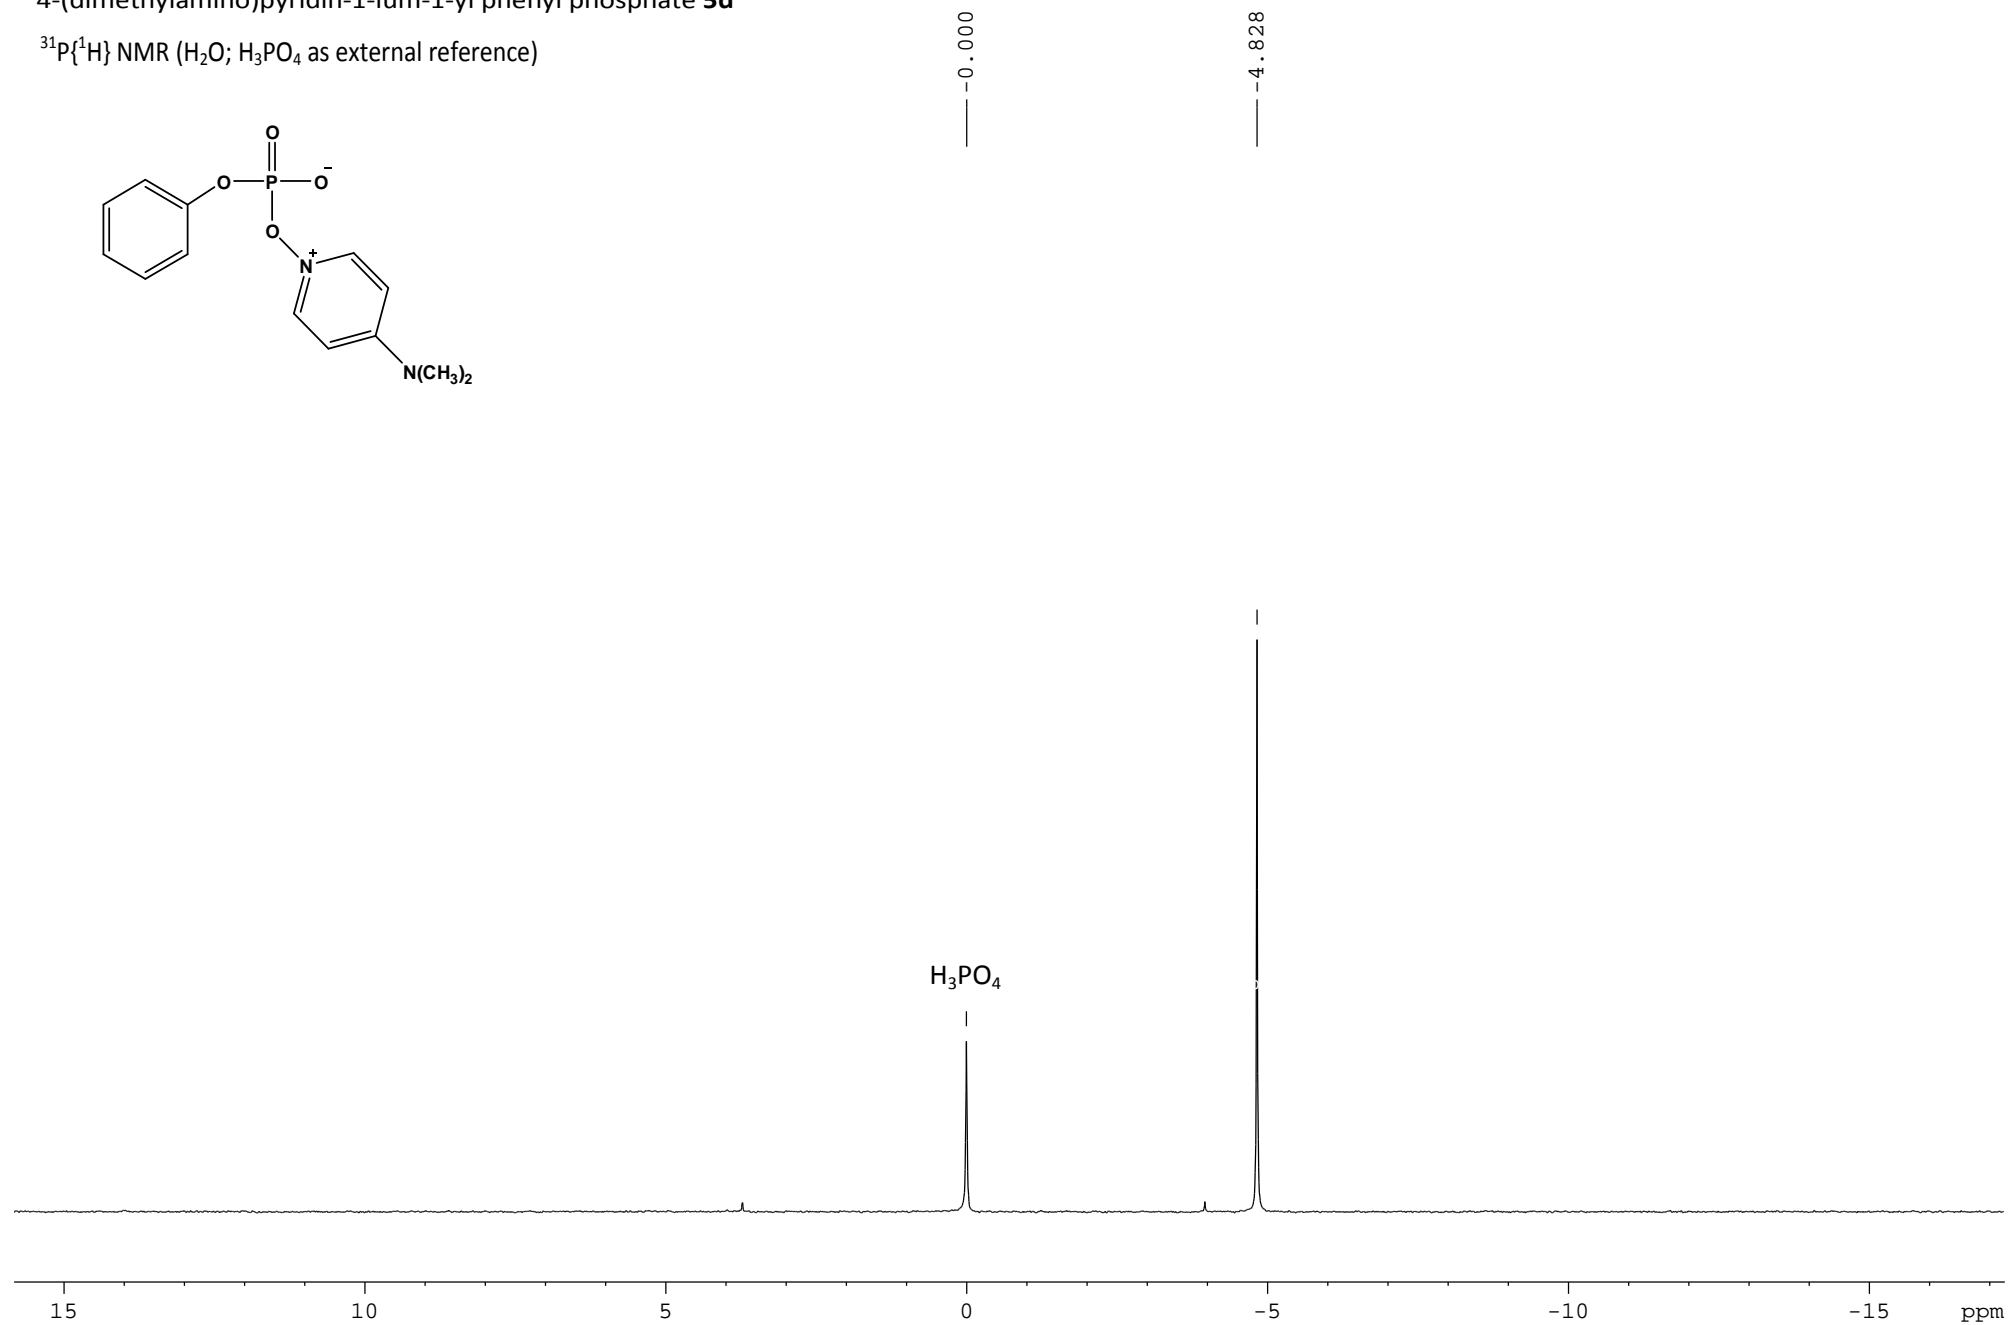

4-(dimethylamino)pyridin-1-ium-1-yl phenyl phosphate **5d**

$^1\text{H}$ - $^1\text{H}$  COSY ( $\text{D}_2\text{O}$ )

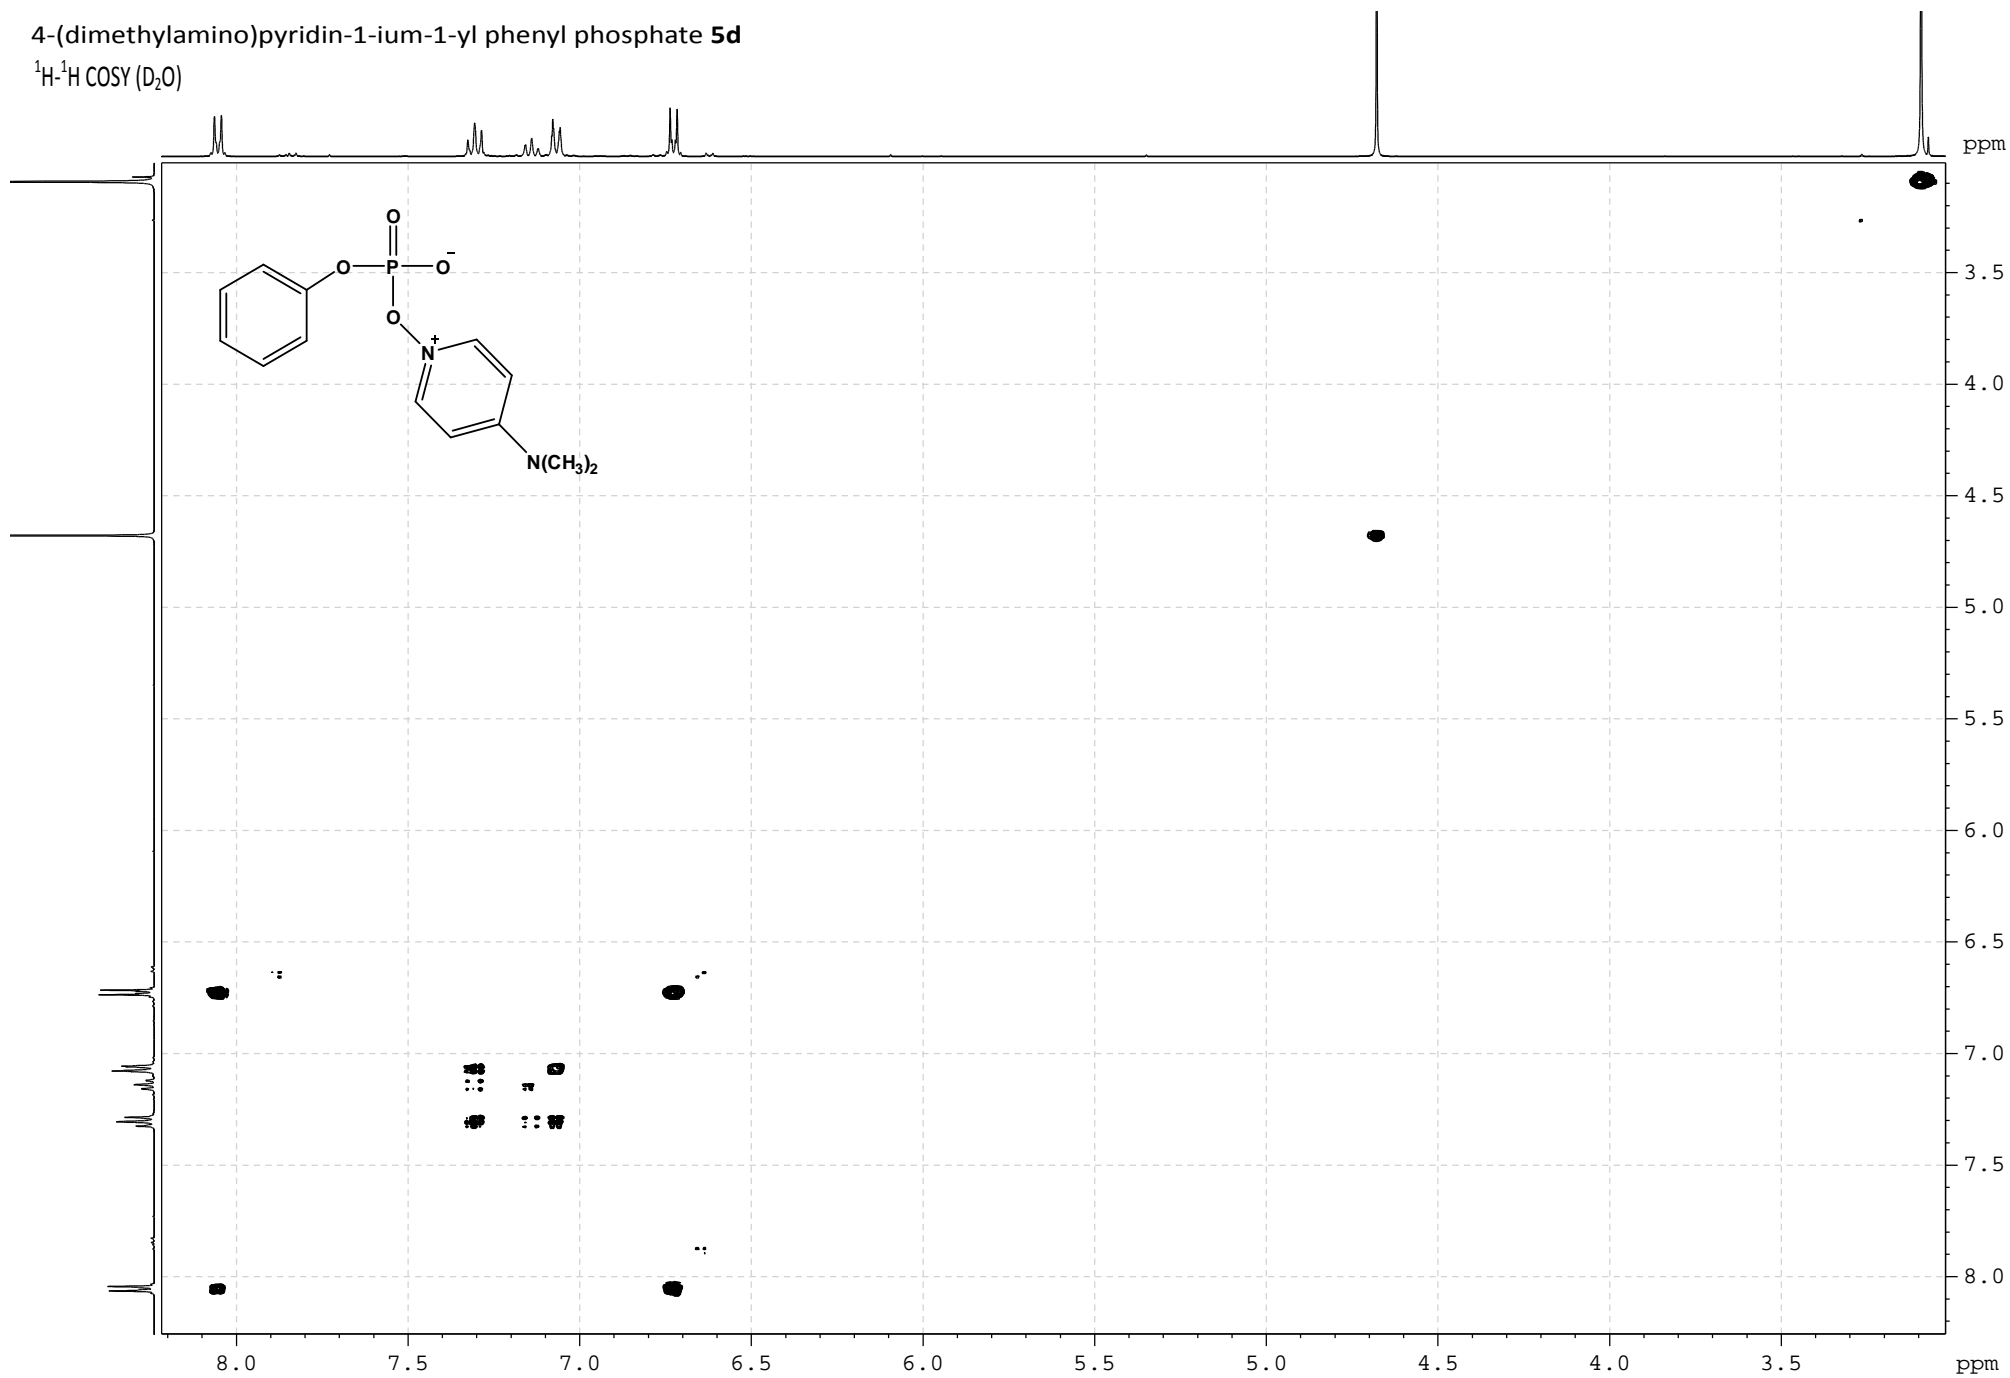

4-(dimethylamino)pyridin-1-ium-1-yl phenyl phosphate **5d**

$^1\text{H}$ - $^{13}\text{C}$  HSQC ( $\text{D}_2\text{O}$ )

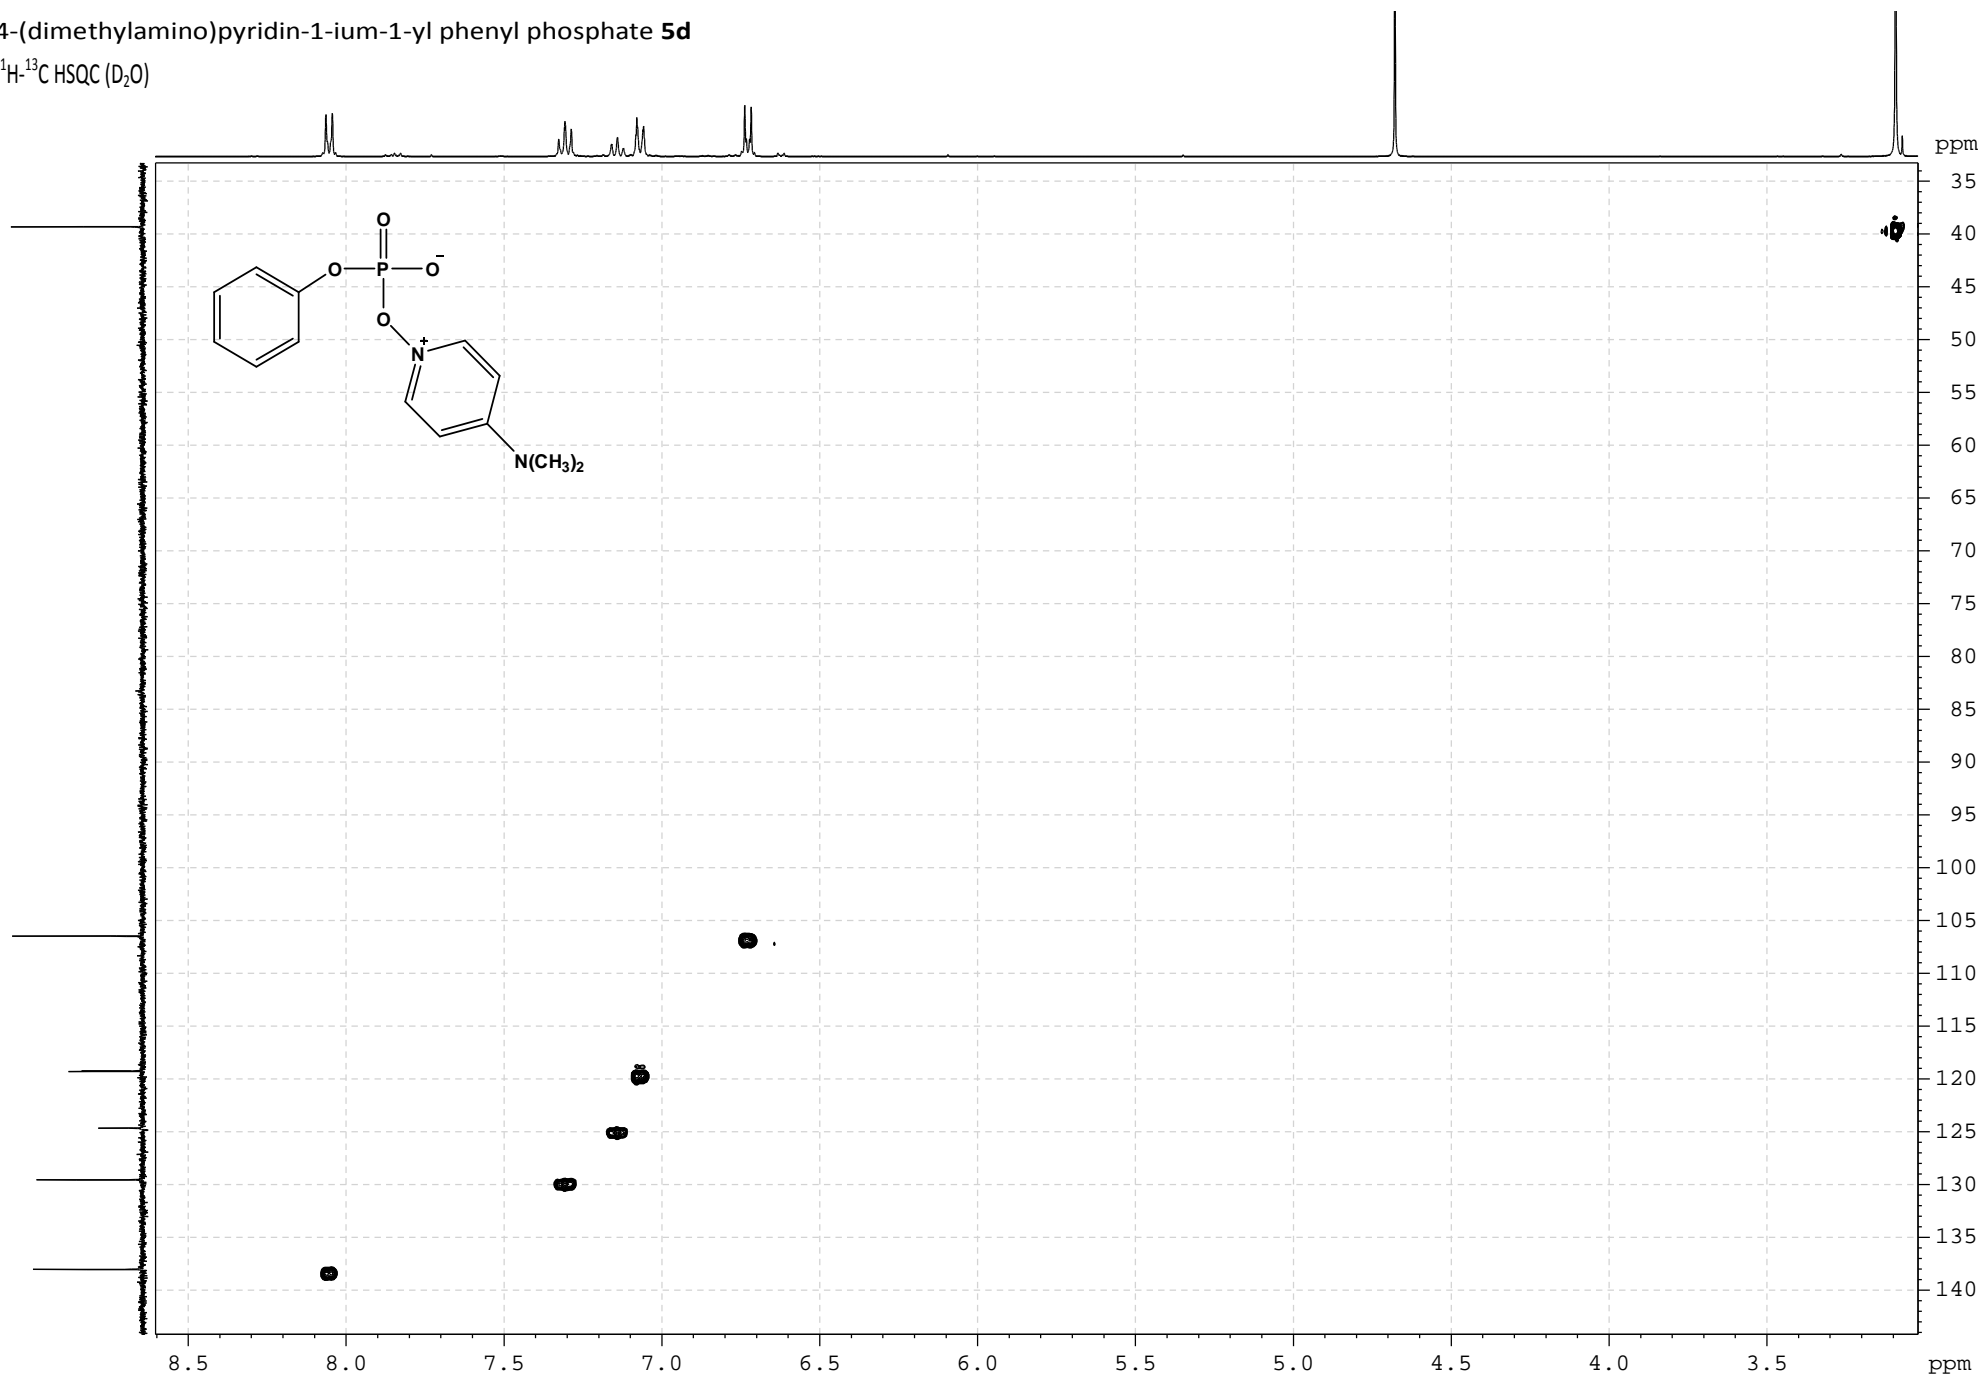

# Mass Spectrum SmartFormula Report

## Analysis Info

Analysis Name D:\Data\Basia\zlecone\15\_08\_31\_a3\_pos2\_kal.d  
 Method ewelina.m  
 Sample Name NO2  
 Comment

Acquisition Date 8/31/2015 1:37:30 PM

Operator Bruker Customer  
 Instrument / Ser# micrOTOF-Q 128

## Acquisition Parameter

|             |            |                       |           |                  |           |
|-------------|------------|-----------------------|-----------|------------------|-----------|
| Source Type | ESI        | Ion Polarity          | Positive  | Set Nebulizer    | 0.4 Bar   |
| Focus       | Not active | Set Capillary         | 4500 V    | Set Dry Heater   | 220 °C    |
| Scan Begin  | 100 m/z    | Set End Plate Offset  | -500 V    | Set Dry Gas      | 4.0 l/min |
| Scan End    | 1200 m/z   | Set Collision Cell RF | 200.0 Vpp | Set Divert Valve | Waste     |

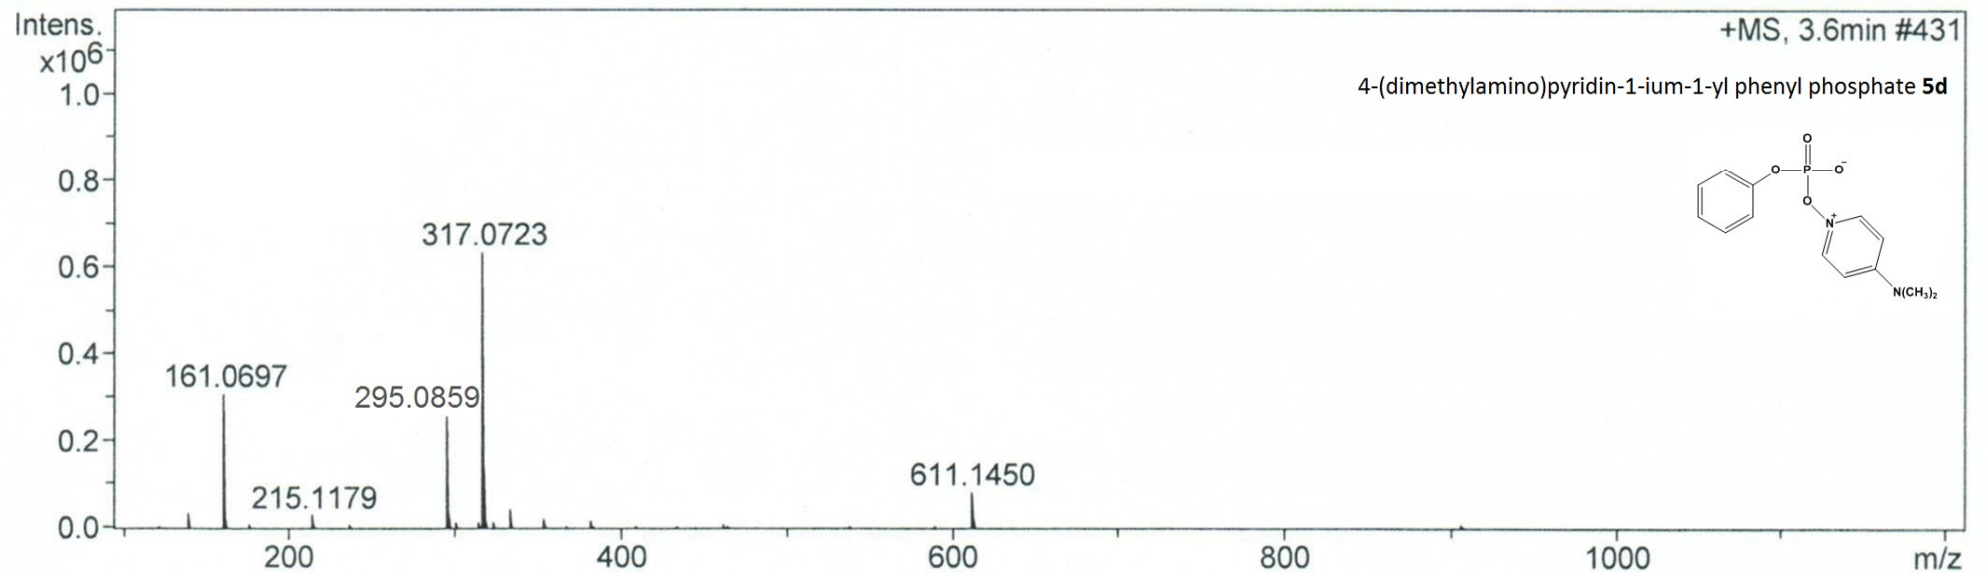

4-(dimethylamino)pyridin-1-ium-1-yl phenyl phosphate **5d**

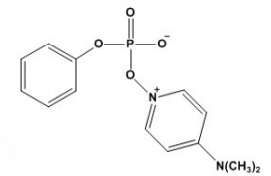

| Meas<br>. m/z | # | Form<br>ula | m/z      | err<br>[ppm] | Mean<br>err<br>[ppm] | rdb | N-Ru<br>le | e <sup>-</sup><br>Conf | mSig<br>ma | Std I | Std<br>Mean<br>m/z | Std I<br>VarN<br>orm | Std<br>m/z<br>Diff | Std<br>Com<br>b<br>Dev |
|---------------|---|-------------|----------|--------------|----------------------|-----|------------|------------------------|------------|-------|--------------------|----------------------|--------------------|------------------------|
| 161.0697      |   |             | 161.0697 |              |                      |     |            |                        |            |       |                    |                      |                    |                        |
| 215.1179      |   |             | 215.1179 |              |                      |     |            |                        |            |       |                    |                      |                    |                        |
| 295.0859      |   |             | 295.0859 |              |                      |     |            |                        |            |       |                    |                      |                    |                        |
| 317.0723      |   |             | 317.0723 |              |                      |     |            |                        |            |       |                    |                      |                    |                        |
| 611.1450      |   |             | 611.1450 |              |                      |     |            |                        |            |       |                    |                      |                    |                        |

Trimethylammonium phenyl phosphate **5e**

$^1\text{H}$  NMR ( $\text{D}_2\text{O}$ )

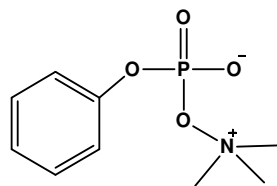

7.531  
7.511  
7.496  
7.491  
7.362  
7.359  
7.343  
7.341  
7.325  
7.322  
7.309  
7.306  
7.303  
7.301  
7.292  
7.289  
7.287  
7.284  
7.281

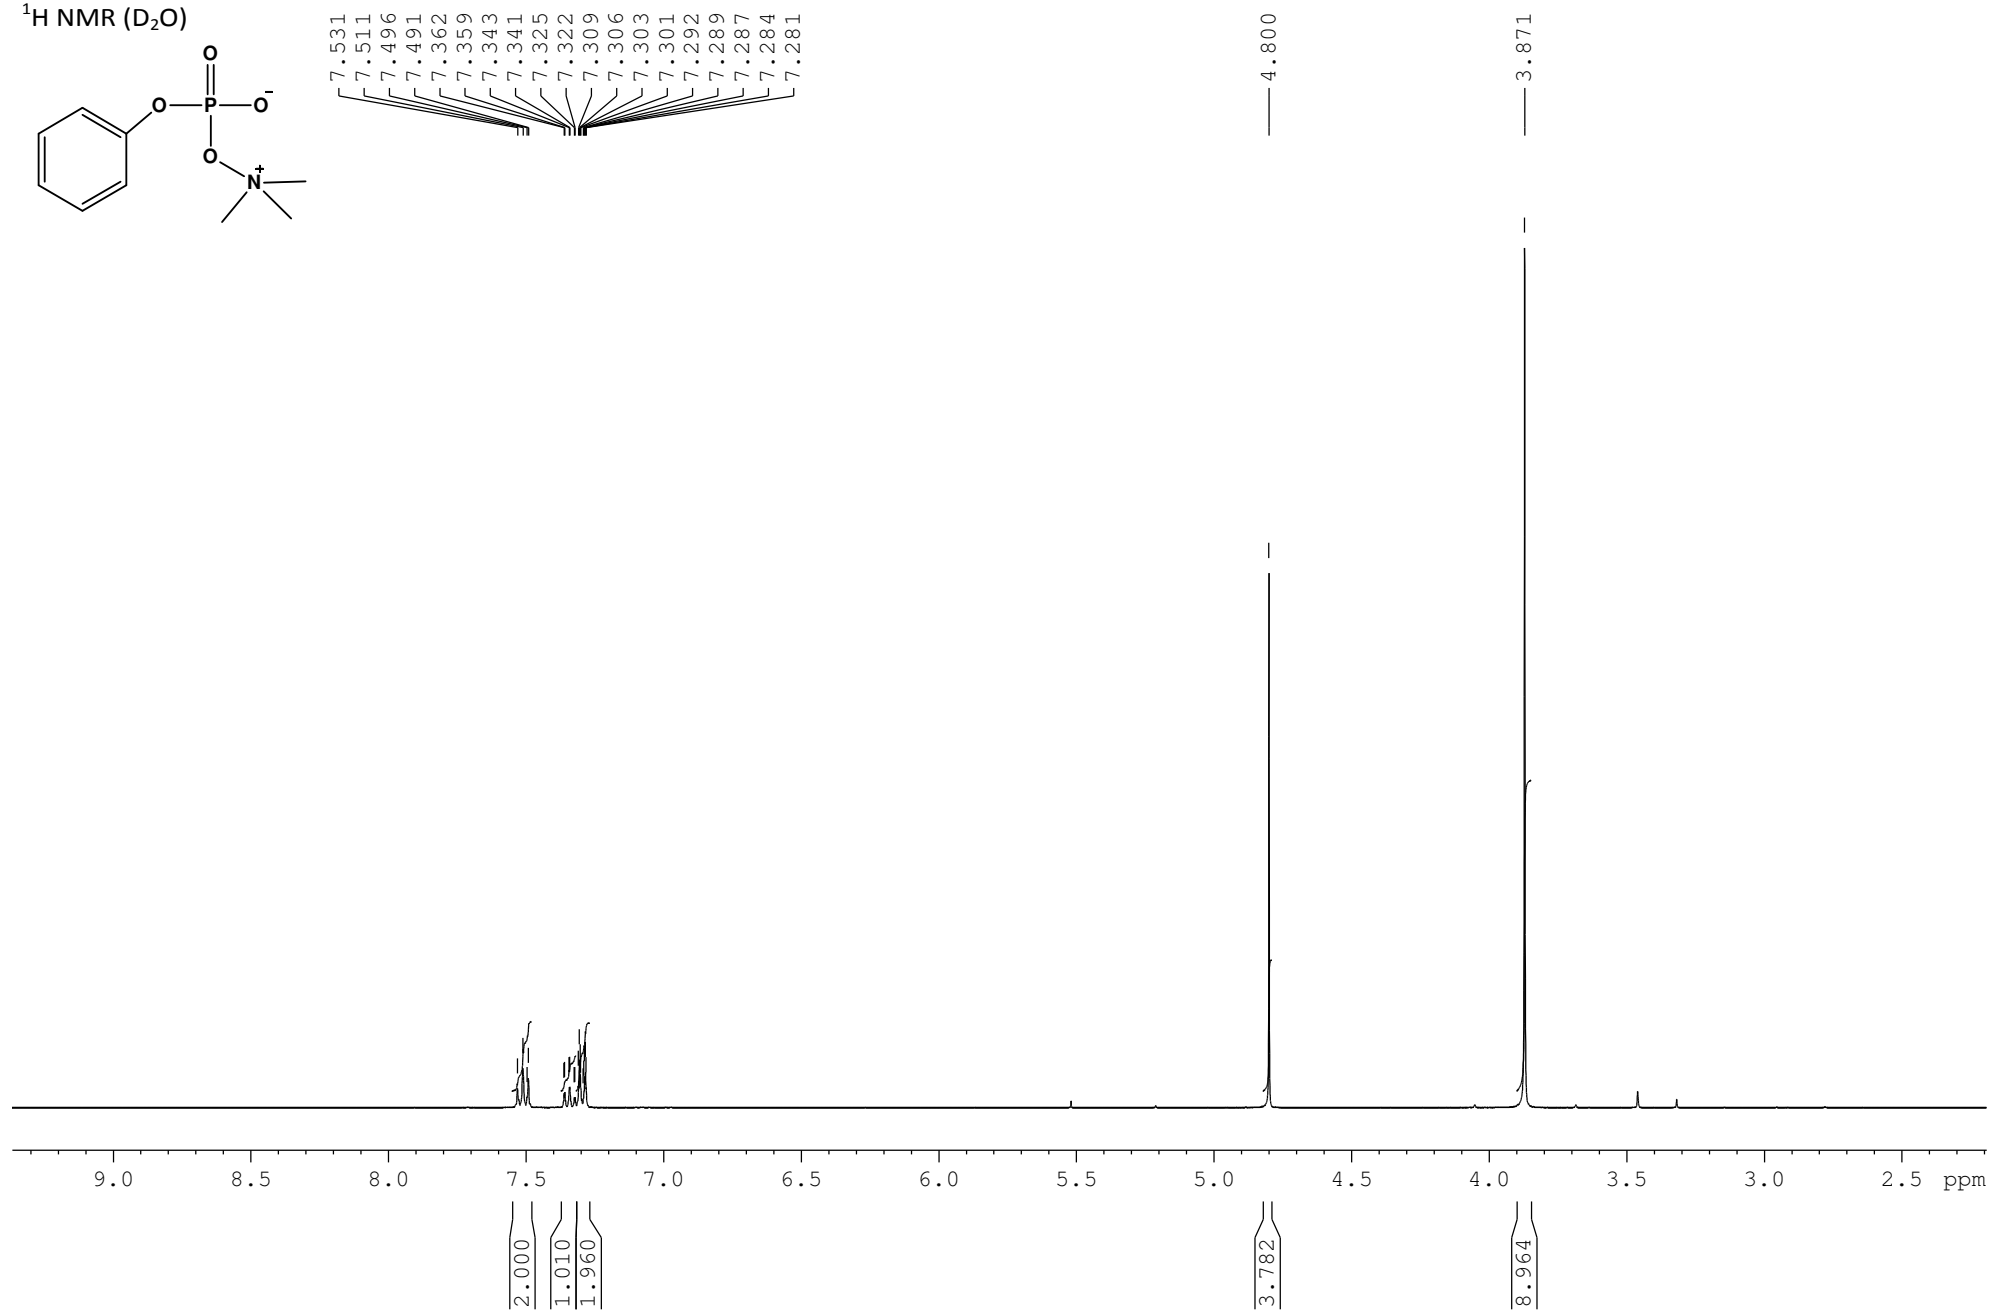

Trimethylammonium phenyl phosphate **5e**

$^{13}\text{C}$  NMR ( $\text{D}_2\text{O}$ )

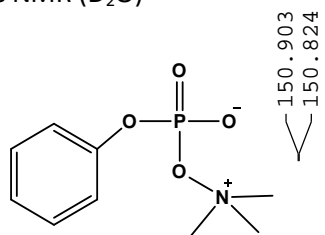

150.903  
150.824

130.008

125.221

119.925

119.887

58.138

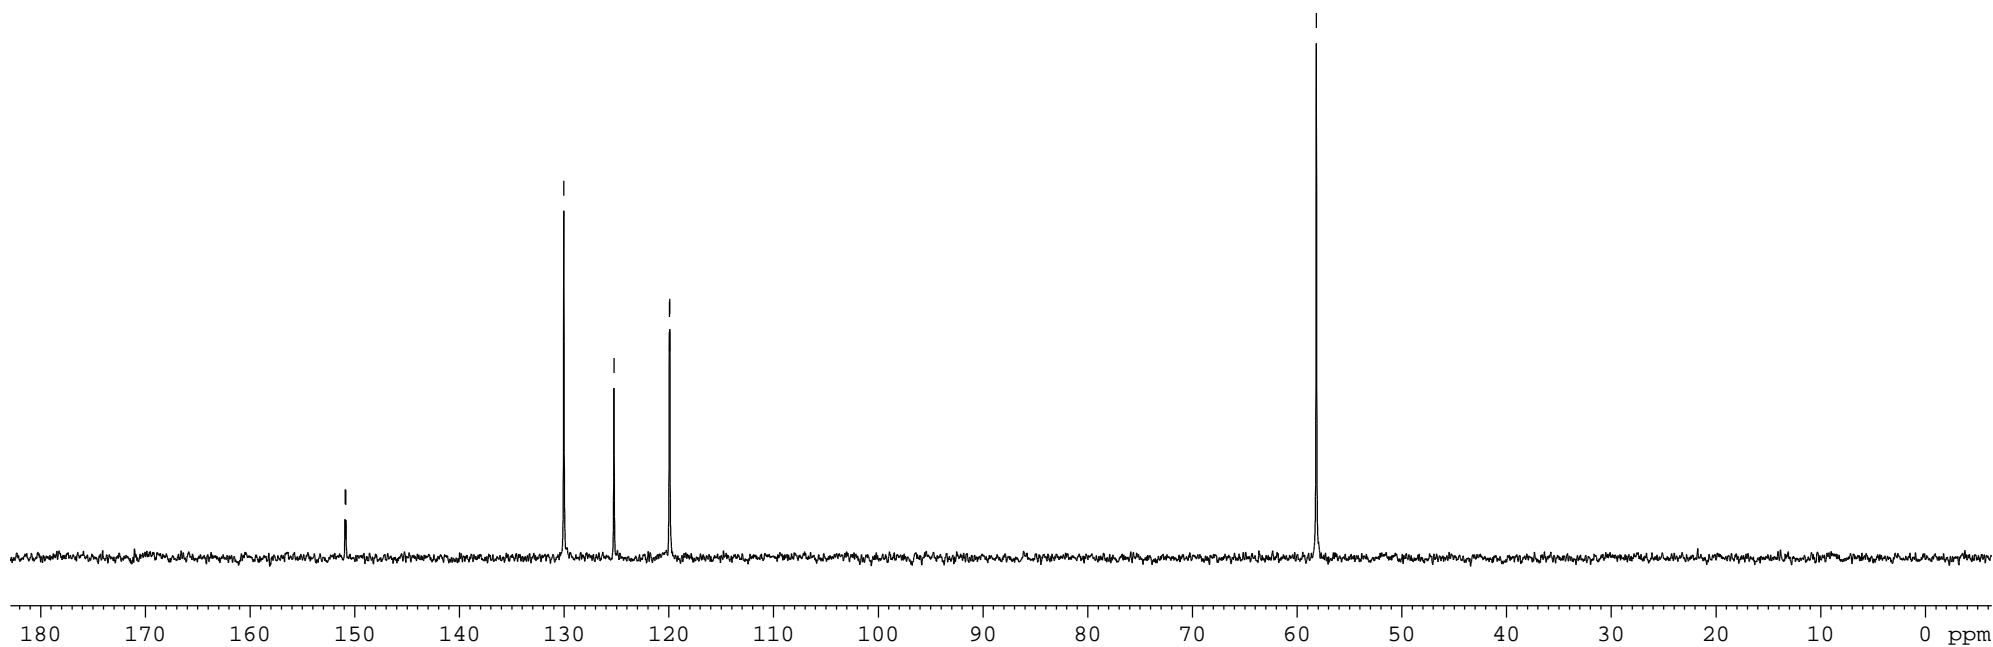



Trimethylammonium phenyl phosphate **5e**

$^{31}\text{P}\{^1\text{H}\}$  NMR ( $\text{H}_2\text{O}$ ;  $\text{H}_3\text{PO}_4$  as external reference)

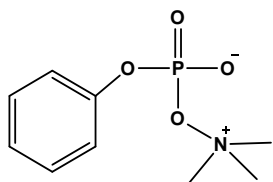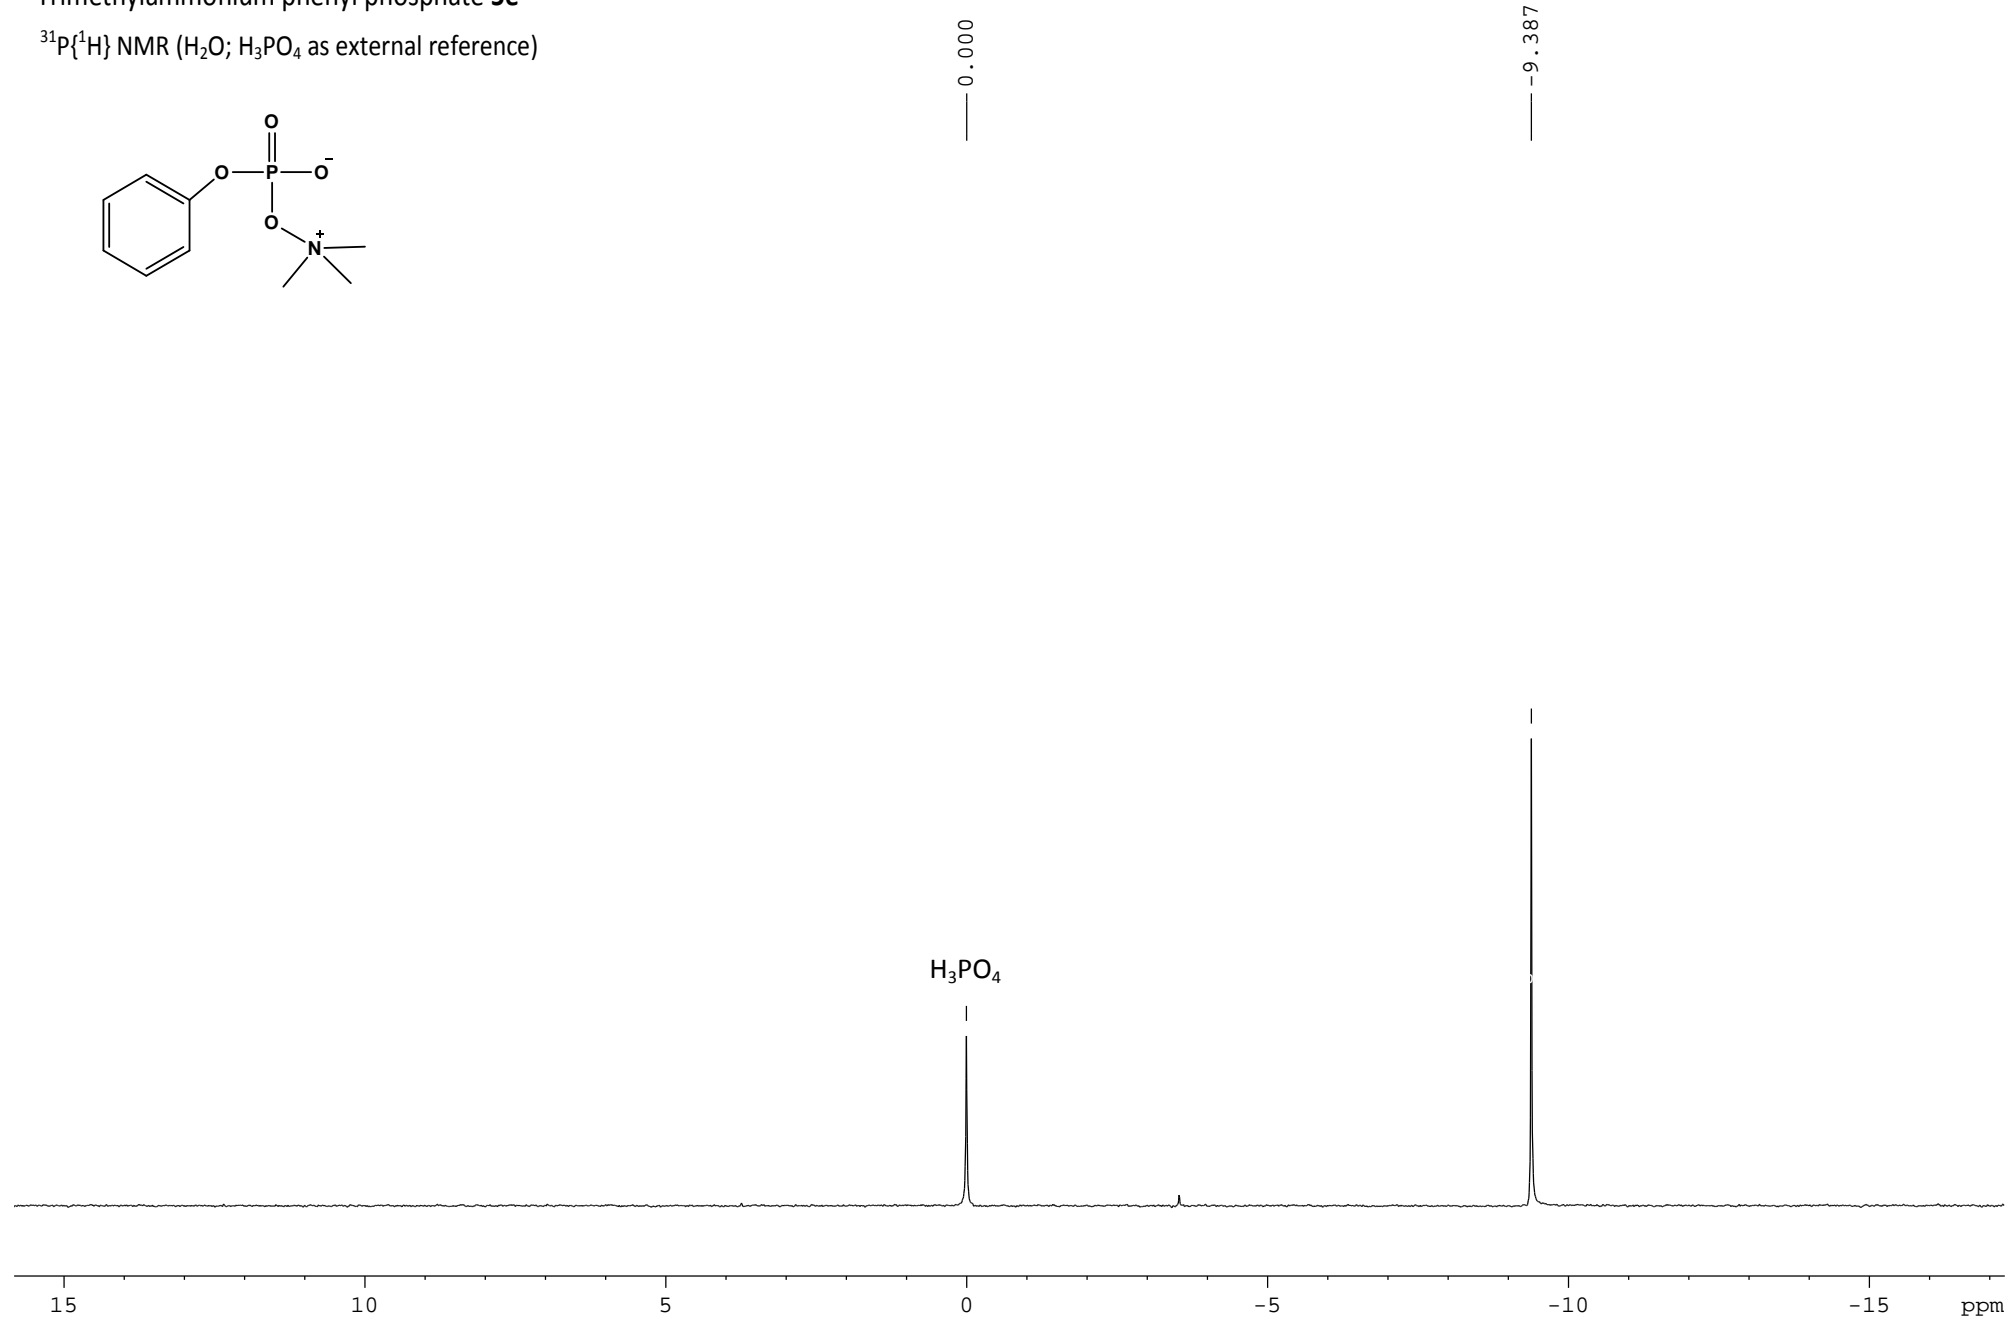

Trimethylammonium phenyl phosphate **5e**

$^1\text{H}$ - $^1\text{H}$  COSY ( $\text{D}_2\text{O}$ )

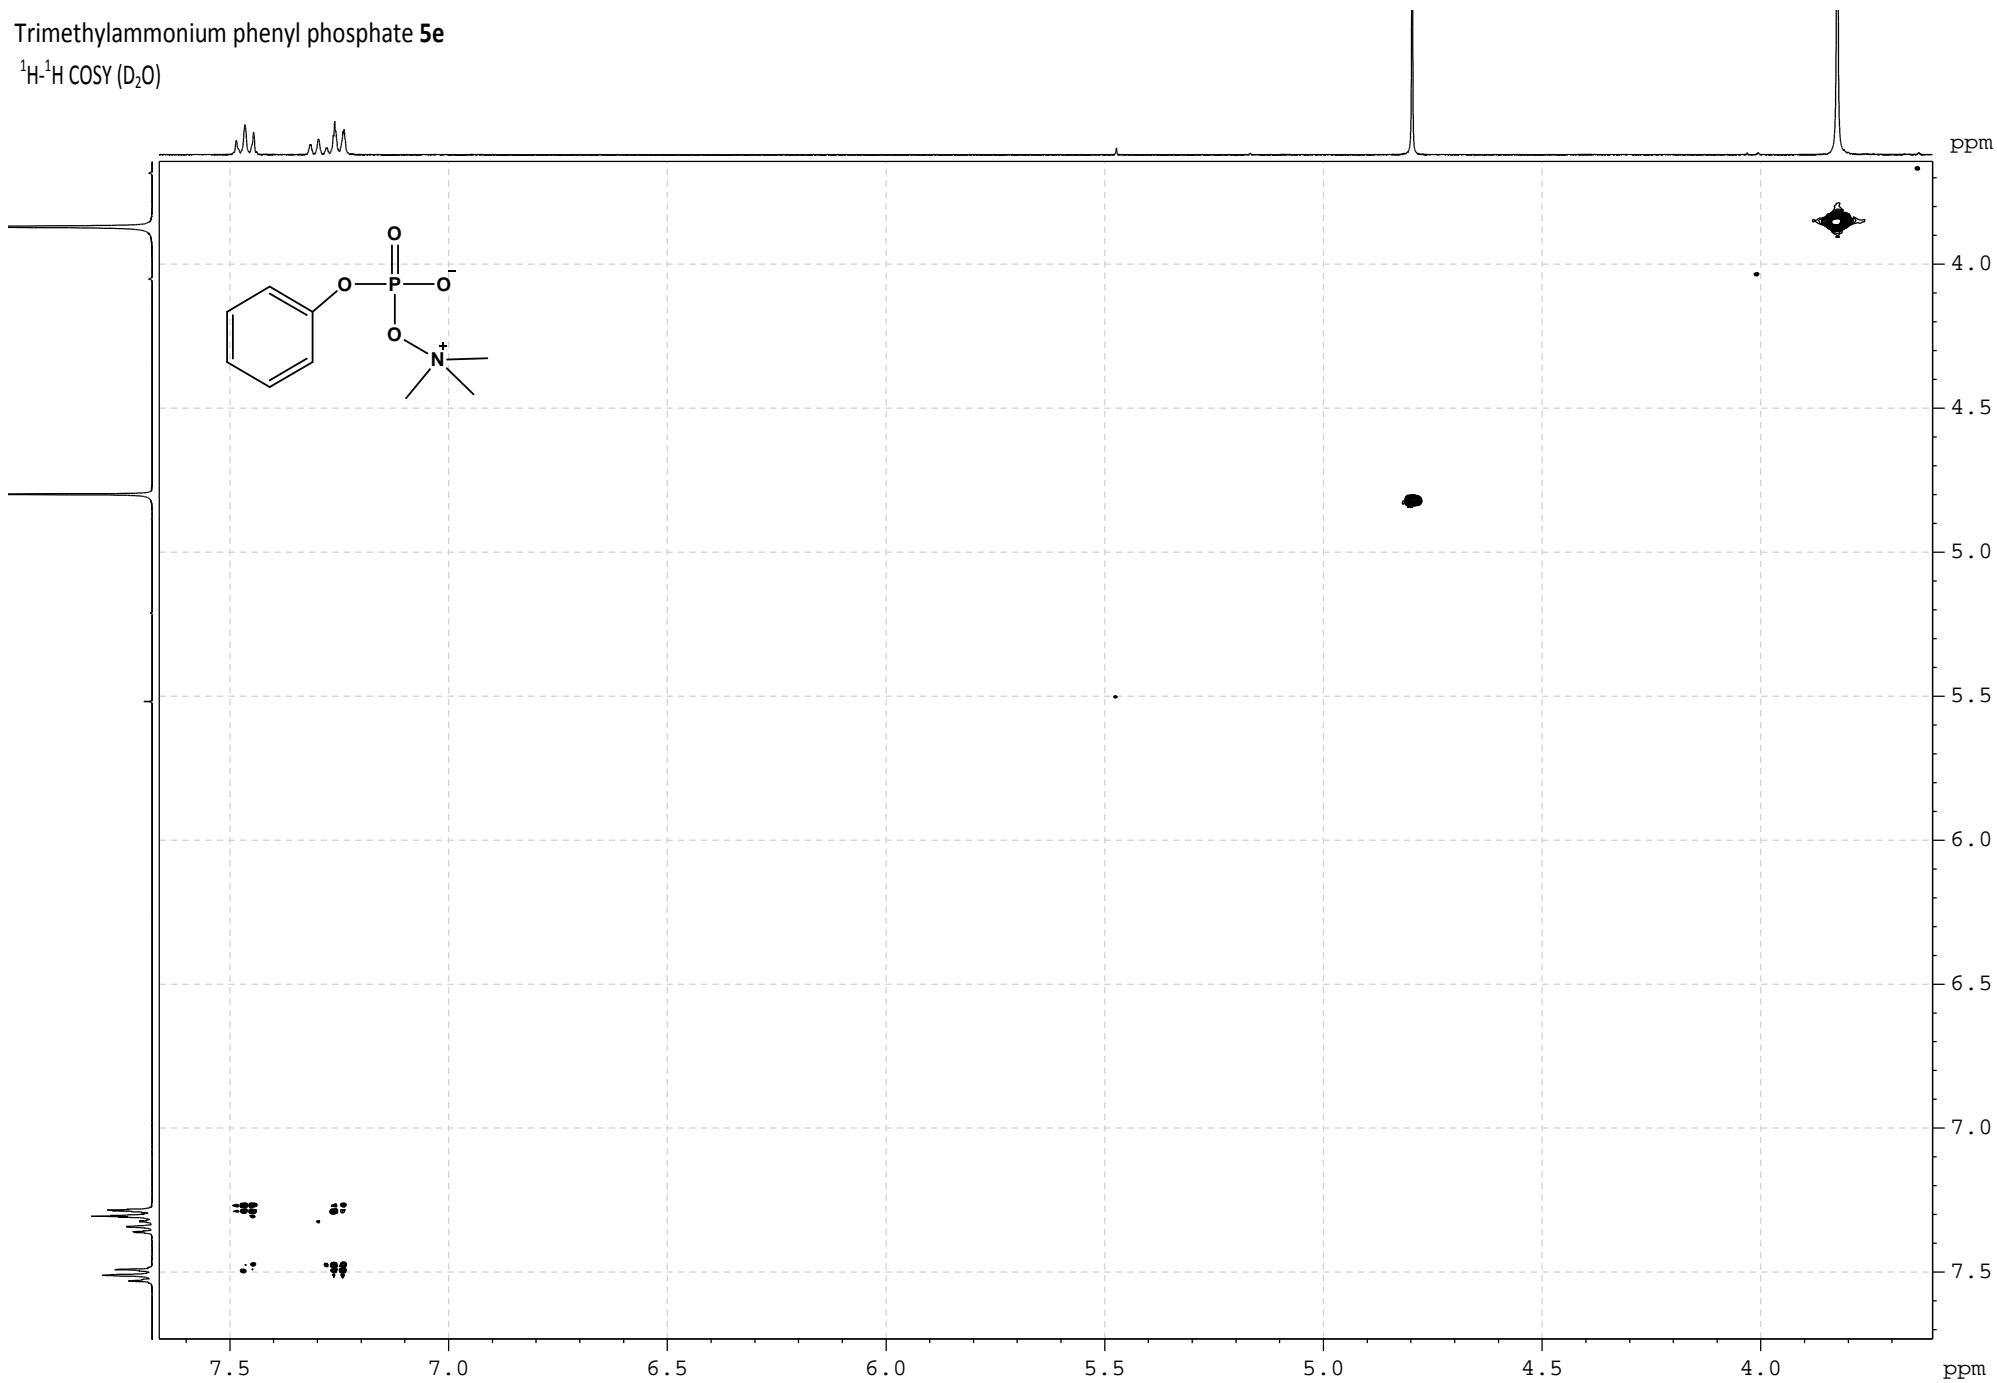

Trimethylammonium phenyl phosphate **5e**

$^1\text{H}$ - $^{13}\text{C}$  HSQC ( $\text{D}_2\text{O}$ )

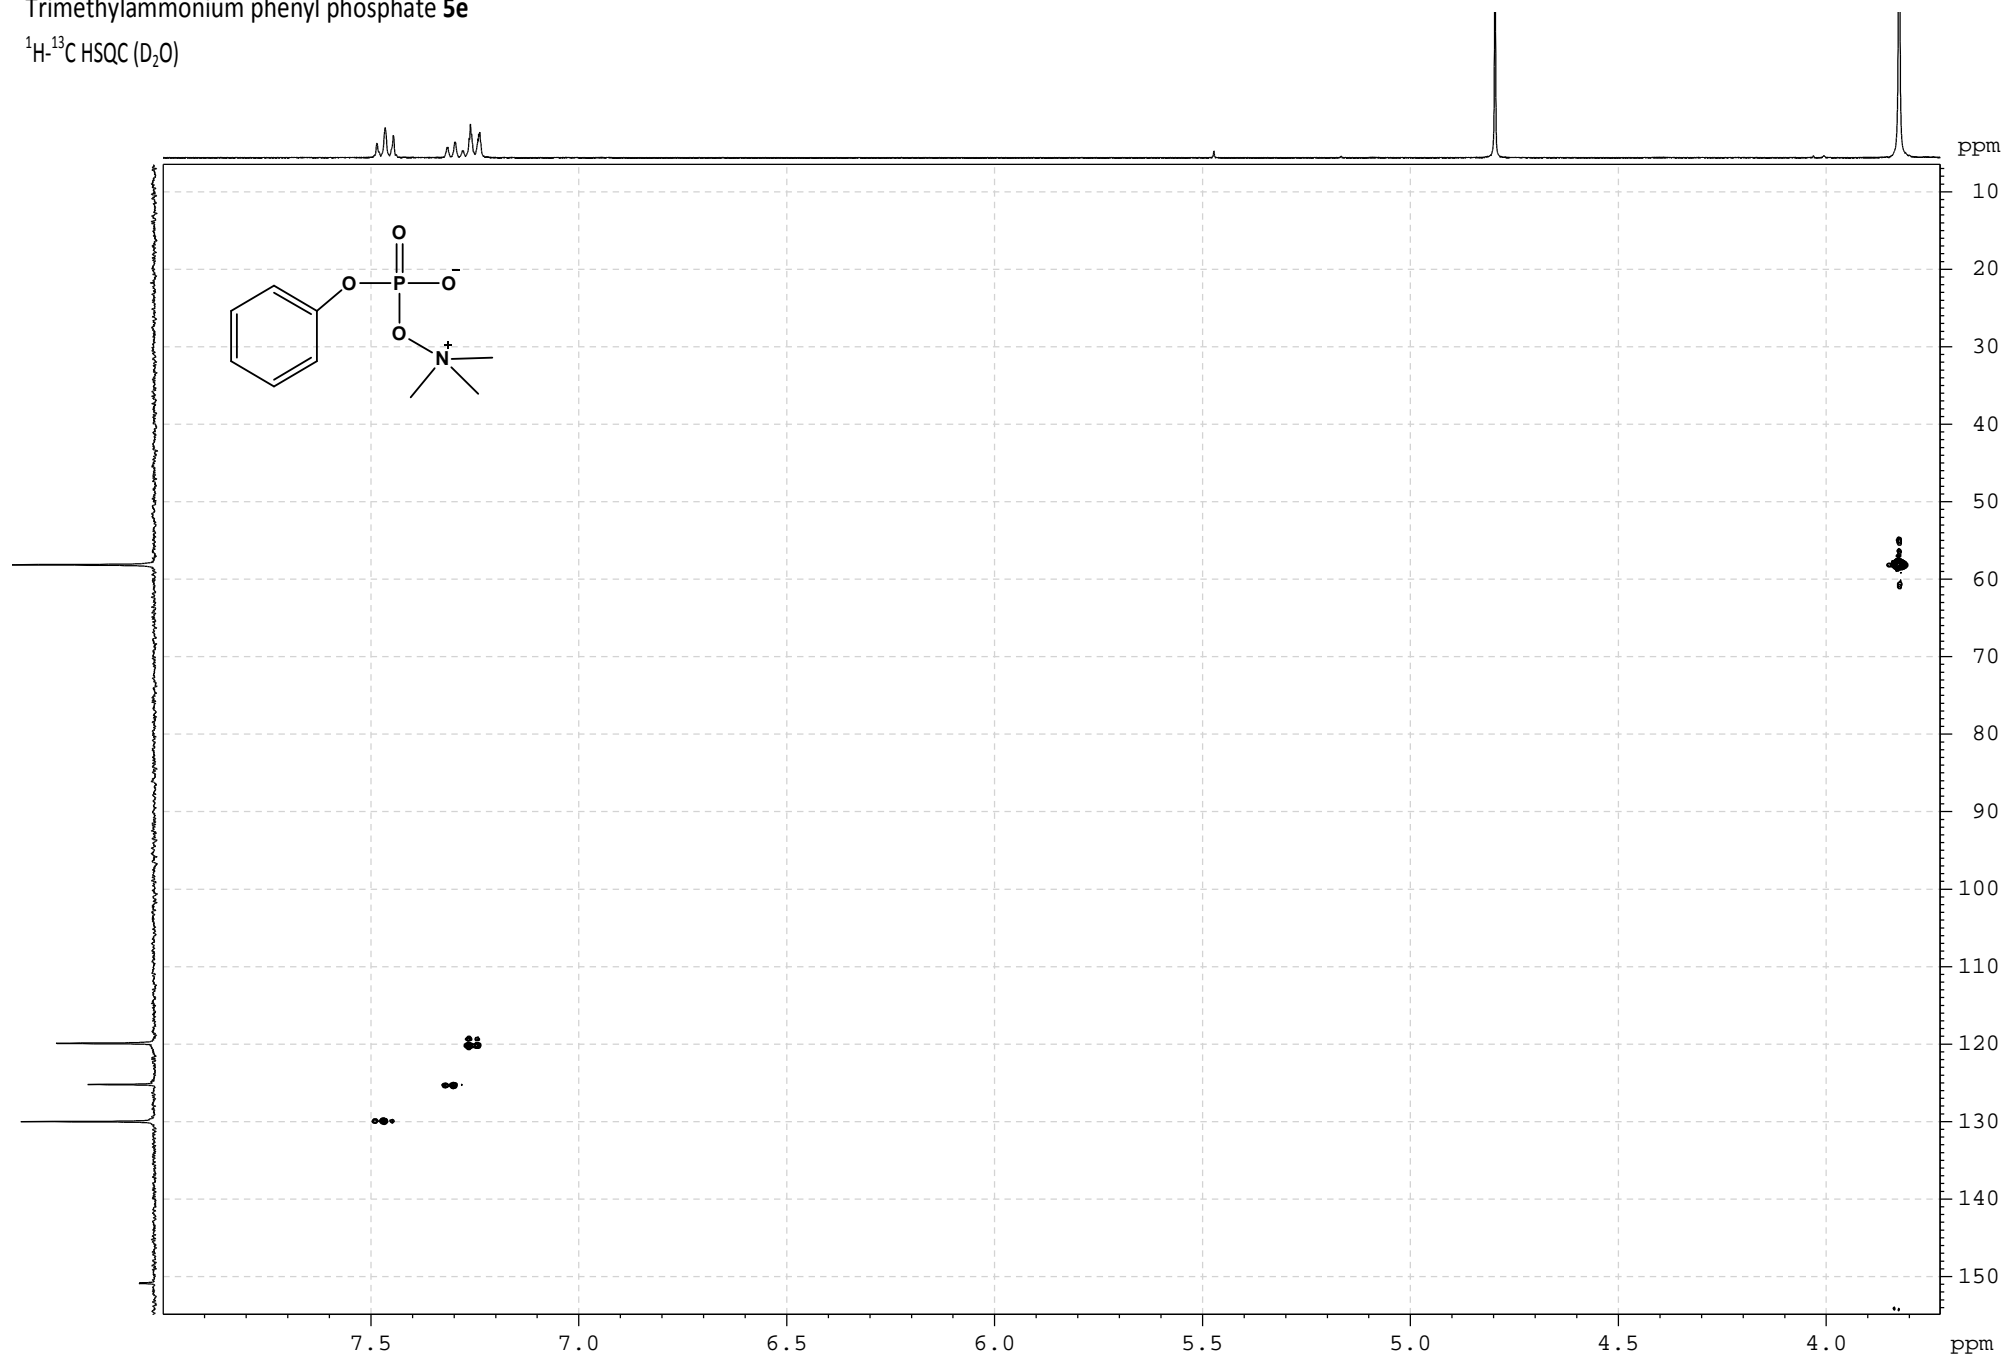

# Mass Spectrum SmartFormula Report

## Analysis Info

Analysis Name D:\Data\Basia\zlecone\15\_02\_24\_A2\_neg.d  
 Method ewelina.m  
 Sample Name  
 Comment

Acquisition Date 2/24/2015 12:57:13 PM

Operator Bruker Customer  
 Instrument / Ser# micrOTOF-Q 128

## Acquisition Parameter

|             |            |                       |           |                  |           |
|-------------|------------|-----------------------|-----------|------------------|-----------|
| Source Type | ESI        | Ion Polarity          | Negative  | Set Nebulizer    | 0.4 Bar   |
| Focus       | Not active | Set Capillary         | 3200 V    | Set Dry Heater   | 220 °C    |
| Scan Begin  | 100 m/z    | Set End Plate Offset  | -500 V    | Set Dry Gas      | 4.0 l/min |
| Scan End    | 1200 m/z   | Set Collision Cell RF | 200.0 Vpp | Set Divert Valve | Source    |

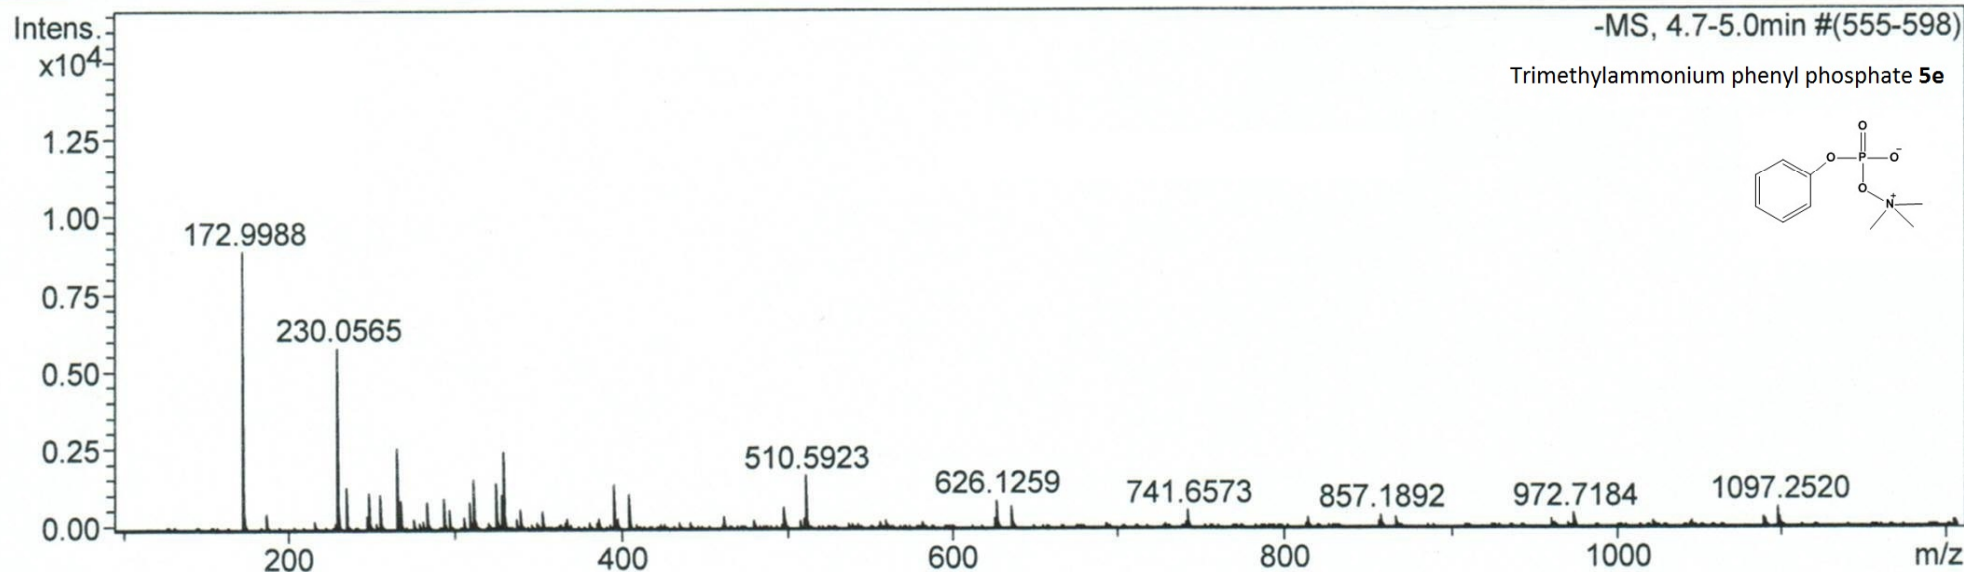

| Meas<br>m/z | # | Form<br>ula | m/z | err<br>[ppm] | Mean<br>err<br>[ppm] | rdb | N-Ru<br>le | e <sup>-</sup><br>Conf | mSig<br>ma | Std I | Std<br>Mean<br>m/z | Std I<br>VarN<br>orm | Std<br>m/z<br>Diff | Std<br>Com<br>b<br>Dev |
|-------------|---|-------------|-----|--------------|----------------------|-----|------------|------------------------|------------|-------|--------------------|----------------------|--------------------|------------------------|
|-------------|---|-------------|-----|--------------|----------------------|-----|------------|------------------------|------------|-------|--------------------|----------------------|--------------------|------------------------|

# Mass Spectrum SmartFormula Report

## Analysis Info

Analysis Name D:\Data\Basia\zlecone\15\_02\_24\_A2pos.d  
 Method ewelina.m  
 Sample Name  
 Comment

Acquisition Date 2/24/2015 12:40:31 PM

Operator Bruker Customer  
 Instrument / Ser# micrOTOF-Q 128

## Acquisition Parameter

|             |            |                       |           |                  |           |
|-------------|------------|-----------------------|-----------|------------------|-----------|
| Source Type | ESI        | Ion Polarity          | Positive  | Set Nebulizer    | 0.4 Bar   |
| Focus       | Not active | Set Capillary         | 4500 V    | Set Dry Heater   | 220 °C    |
| Scan Begin  | 100 m/z    | Set End Plate Offset  | -500 V    | Set Dry Gas      | 4.0 l/min |
| Scan End    | 1200 m/z   | Set Collision Cell RF | 200.0 Vpp | Set Divert Valve | Source    |

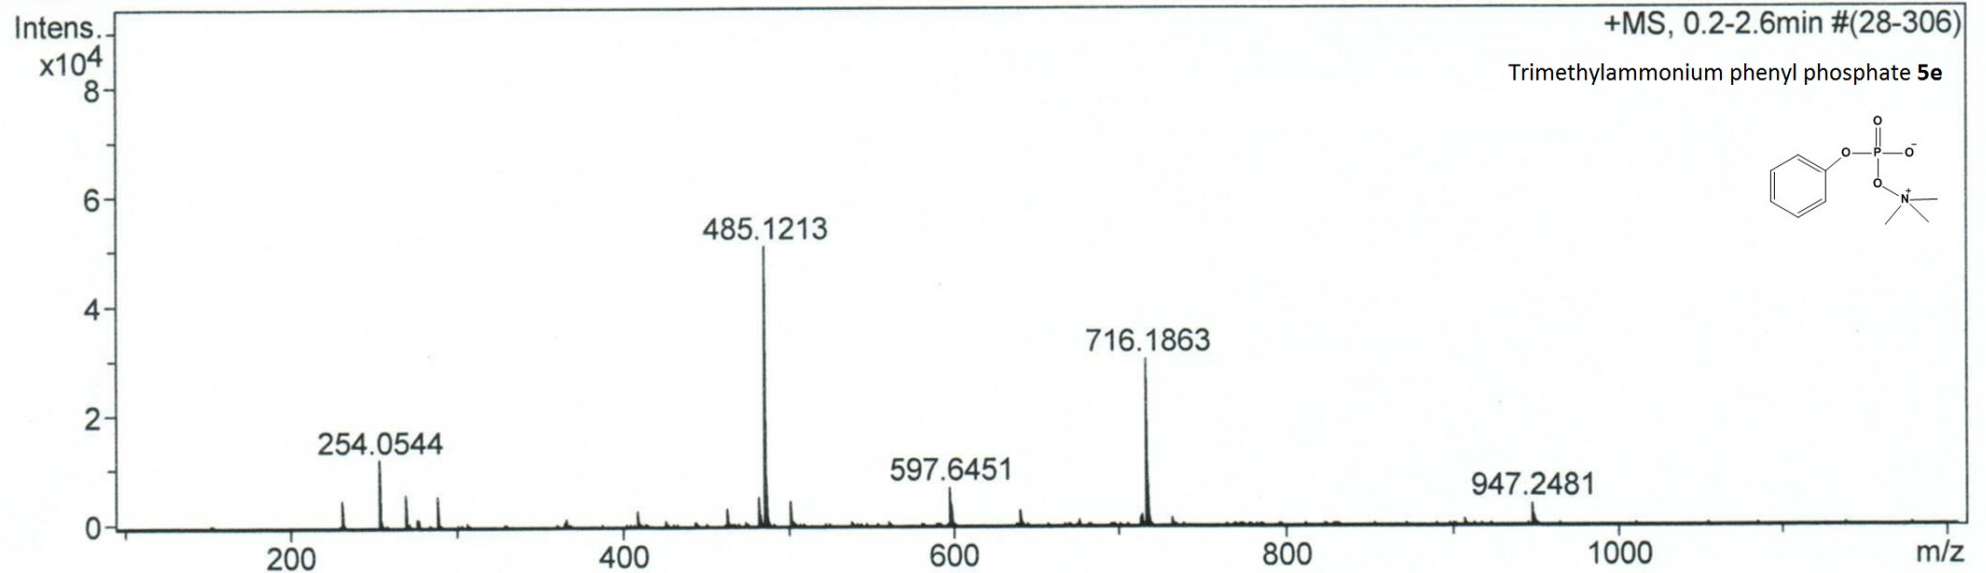

| Meas<br>m/z | # | Form<br>ula | m/z | err<br>[ppm] | Mean<br>err<br>[ppm] | rdb | N-Ru<br>le | e <sup>-</sup><br>Conf | mSig<br>ma | Std I | Std<br>Mean<br>m/z | Std I<br>VarN<br>orm | Std<br>m/z<br>Diff | Std<br>Com<br>b<br>Dev |
|-------------|---|-------------|-----|--------------|----------------------|-----|------------|------------------------|------------|-------|--------------------|----------------------|--------------------|------------------------|
|-------------|---|-------------|-----|--------------|----------------------|-----|------------|------------------------|------------|-------|--------------------|----------------------|--------------------|------------------------|

*N*-methylmorpholino-4-ium 5'-*O*-dimethoxytritylthymidin-3'-yl phosphate **5f**

<sup>1</sup>H NMR (DMSO-*d*<sub>6</sub>)

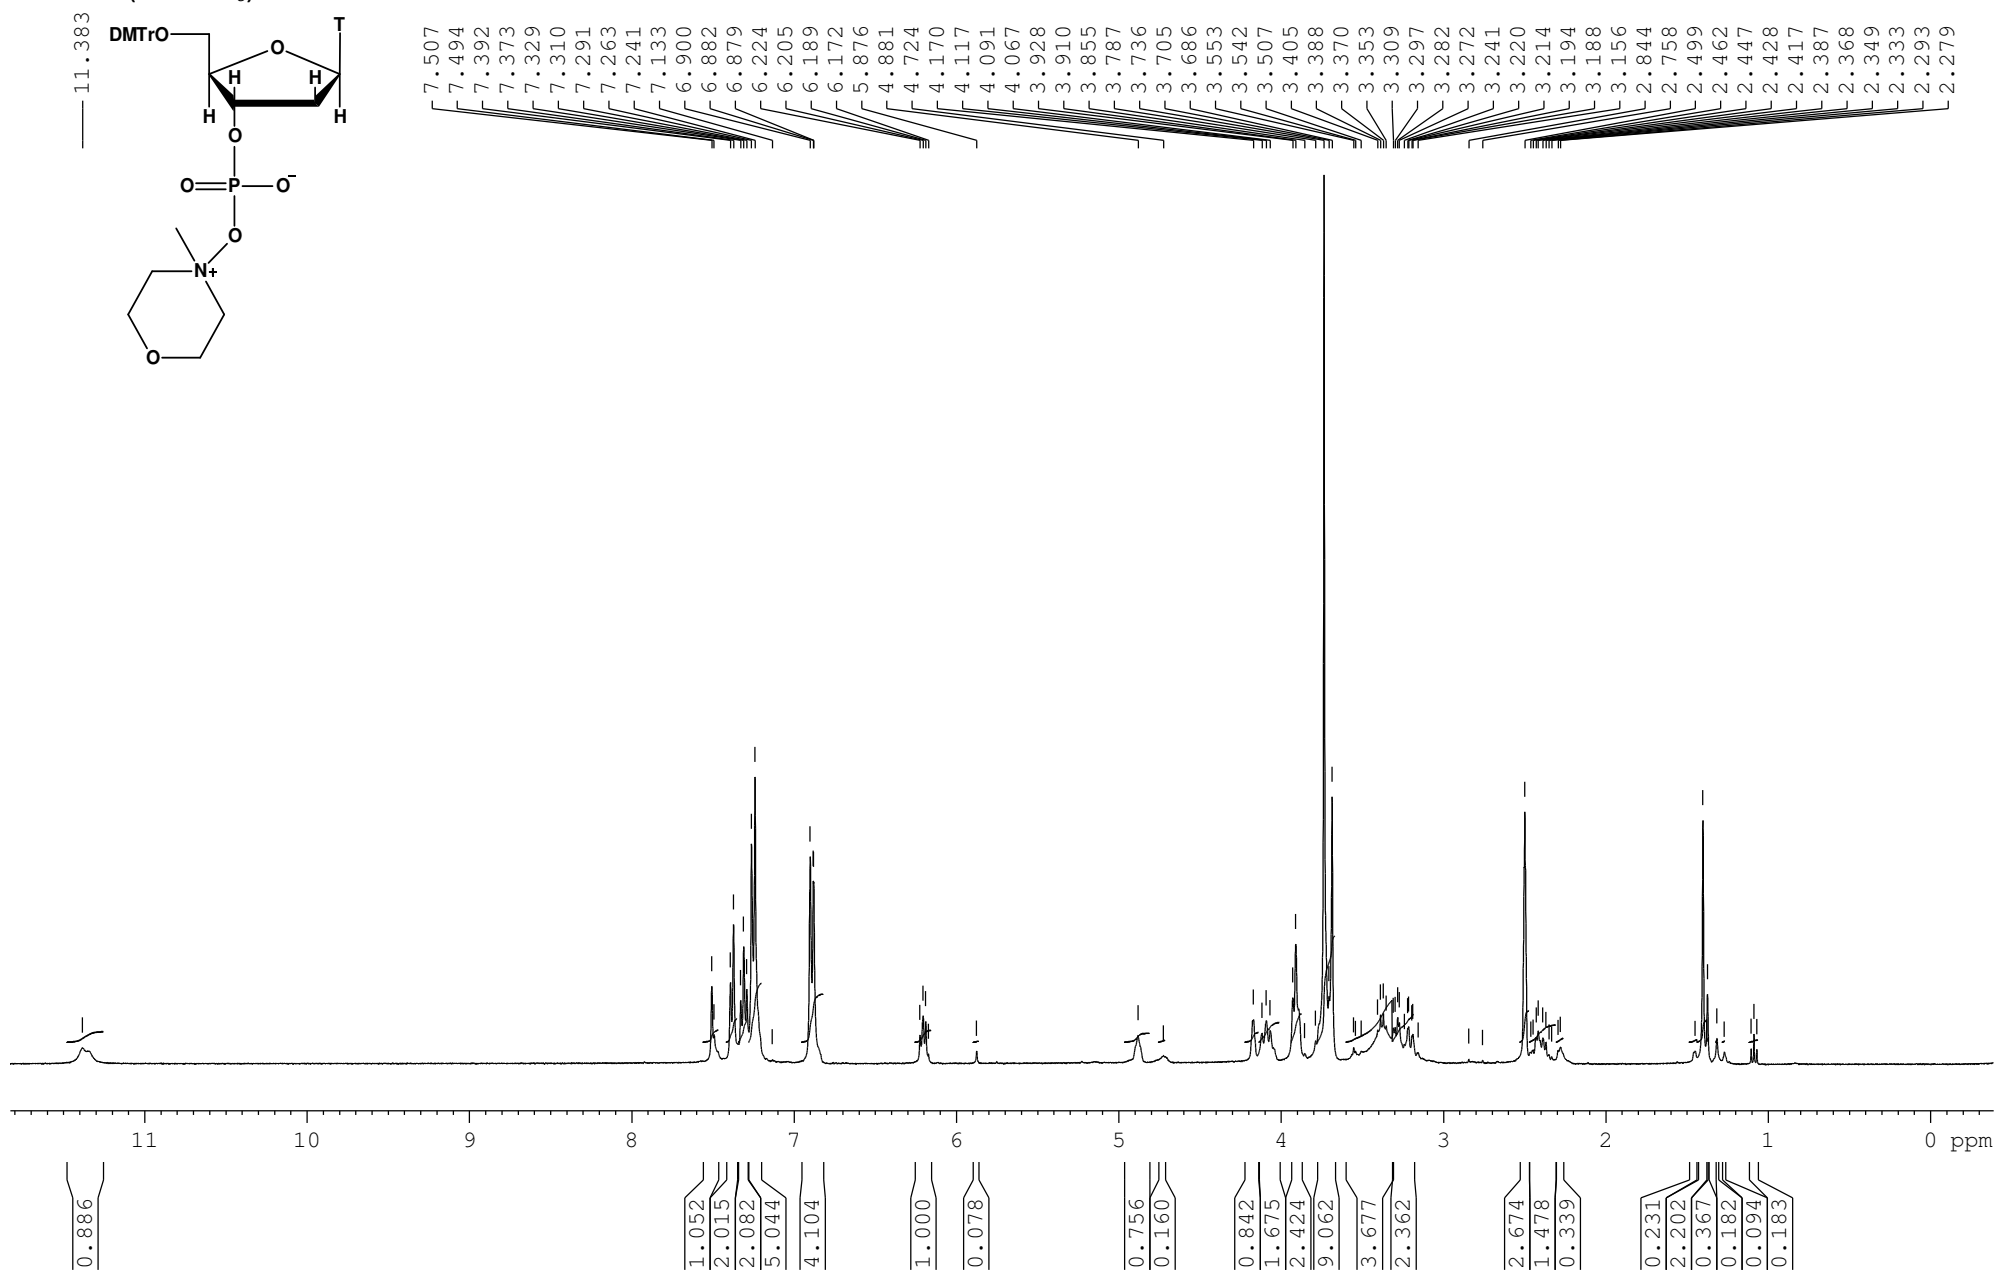

*N*-methylmorpholino-4-ium 5'-*O*-dimethoxytritylthymidin-3'-yl phosphate **5f**

$^{13}\text{C}$  NMR (DMSO- $d_6$ )

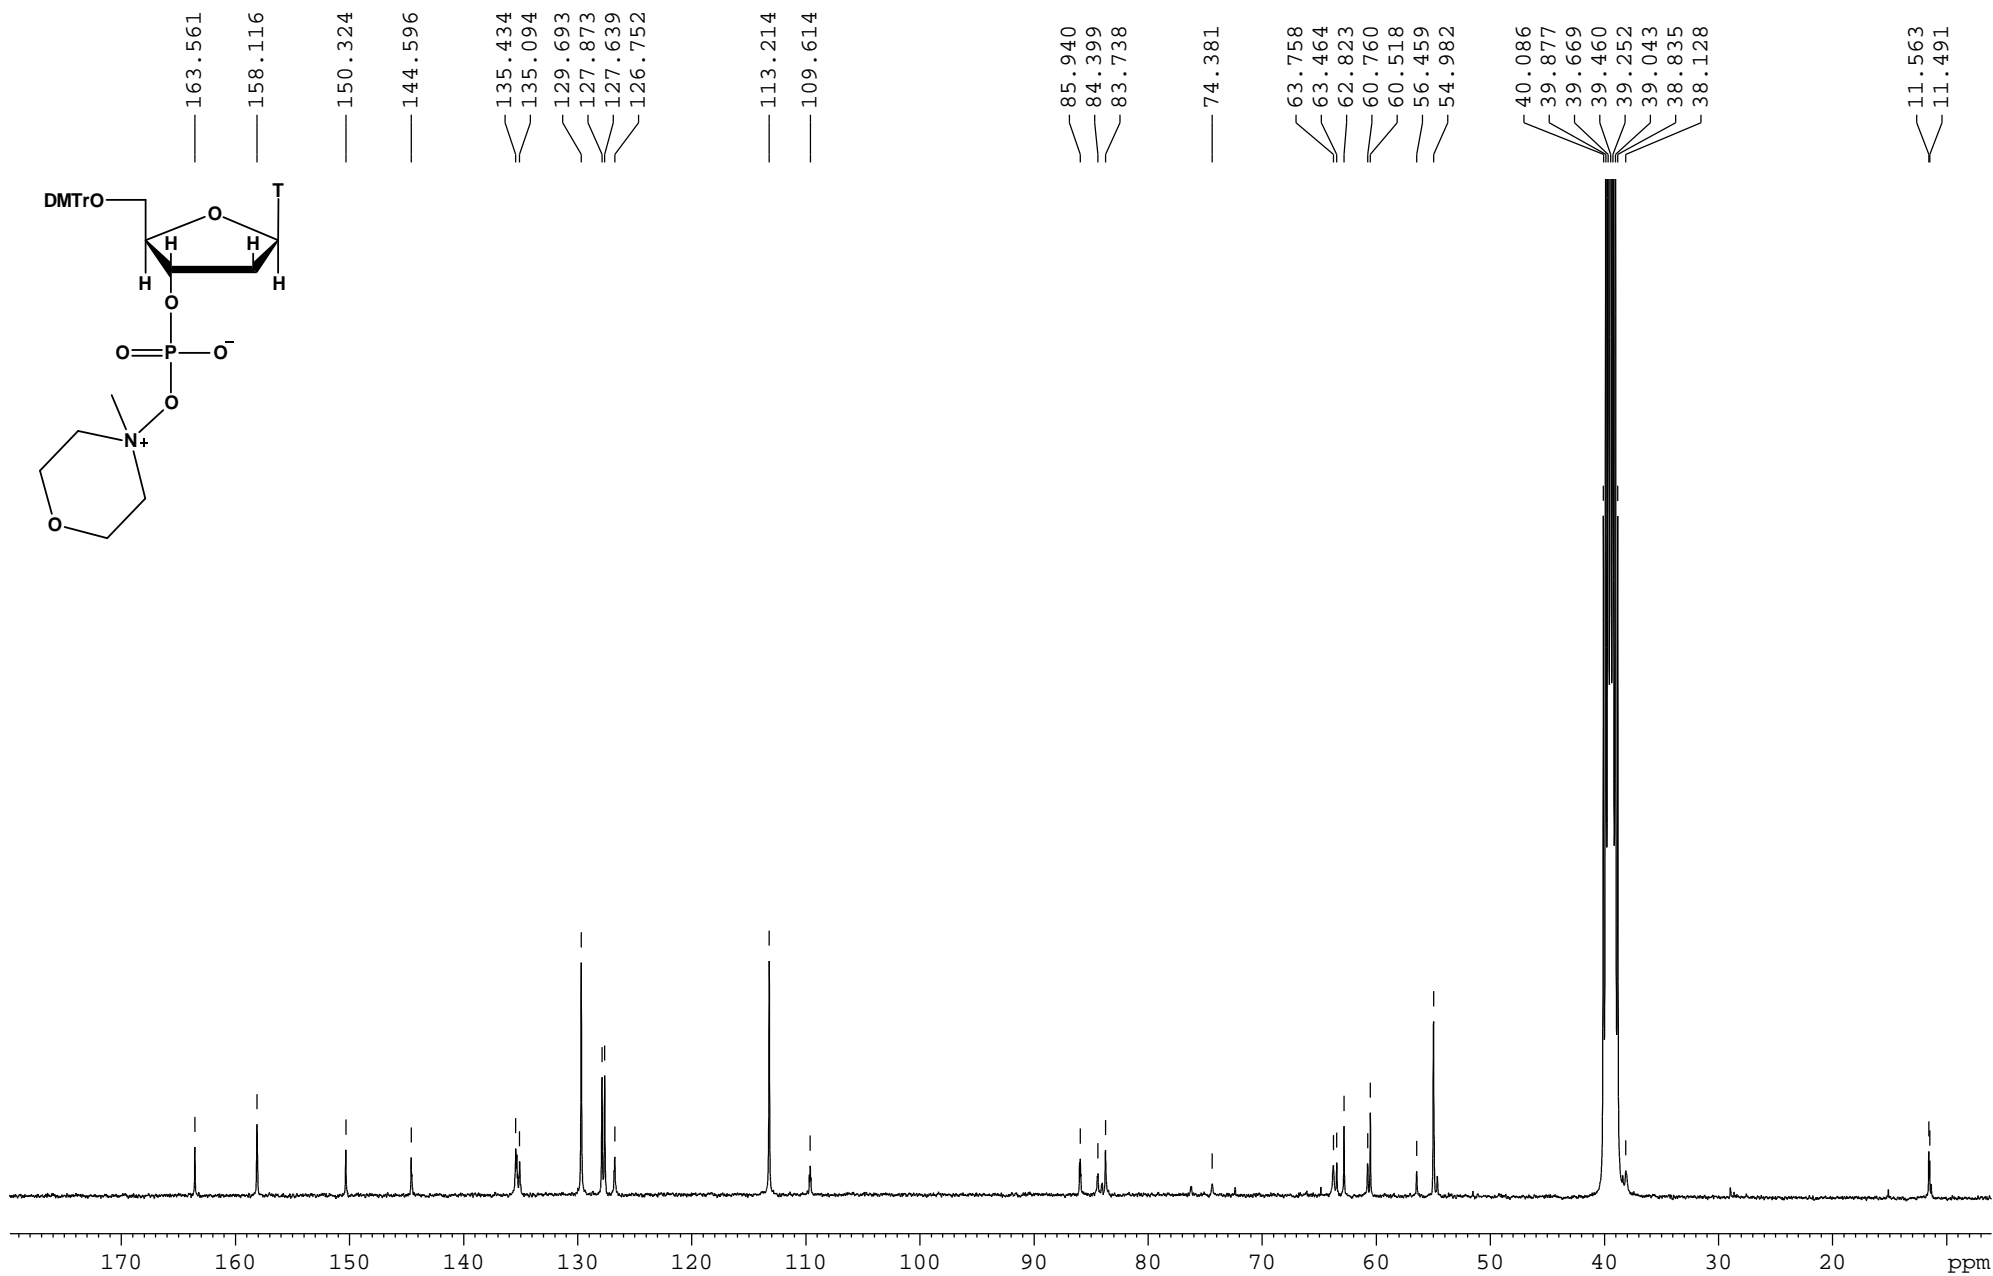

*N*-methylmorpholino-4-ium 5'-*O*-dimethoxytritylthymidin-3'-yl phosphate **5f**

$^{31}\text{P}\{^1\text{H}\}$  NMR (DMSO;  $\text{H}_3\text{PO}_4$  as external reference)

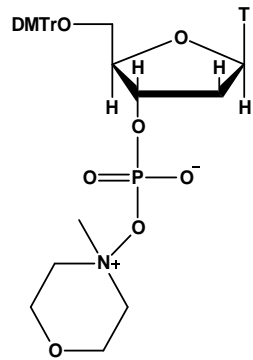

0.328  
0.000  
-3.665

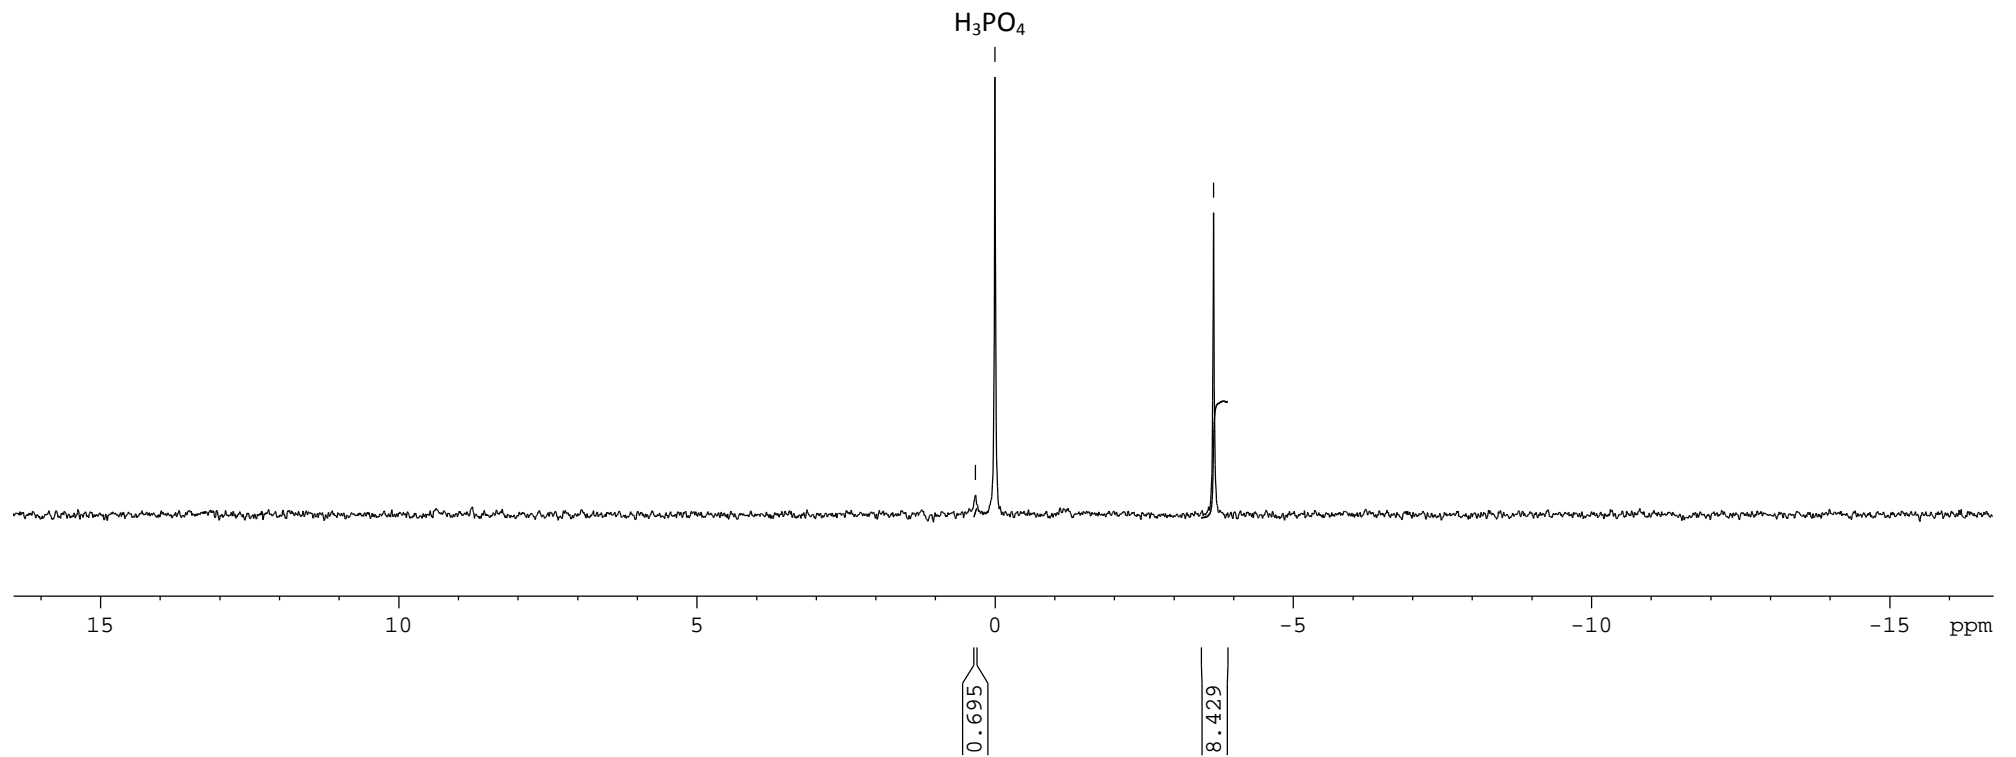



*N*-methylmorpholino-4-ium 5'-*O*-dimethoxytritylthymidin-3'-yl phosphate **5f**

<sup>31</sup>P NMR (DMSO; H<sub>3</sub>PO<sub>4</sub> as external reference)

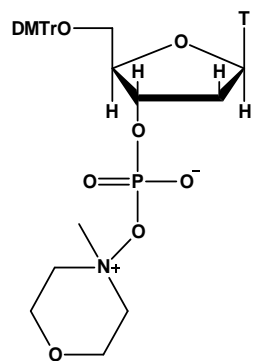

0.016

590.223  
597.269

H<sub>3</sub>PO<sub>4</sub>

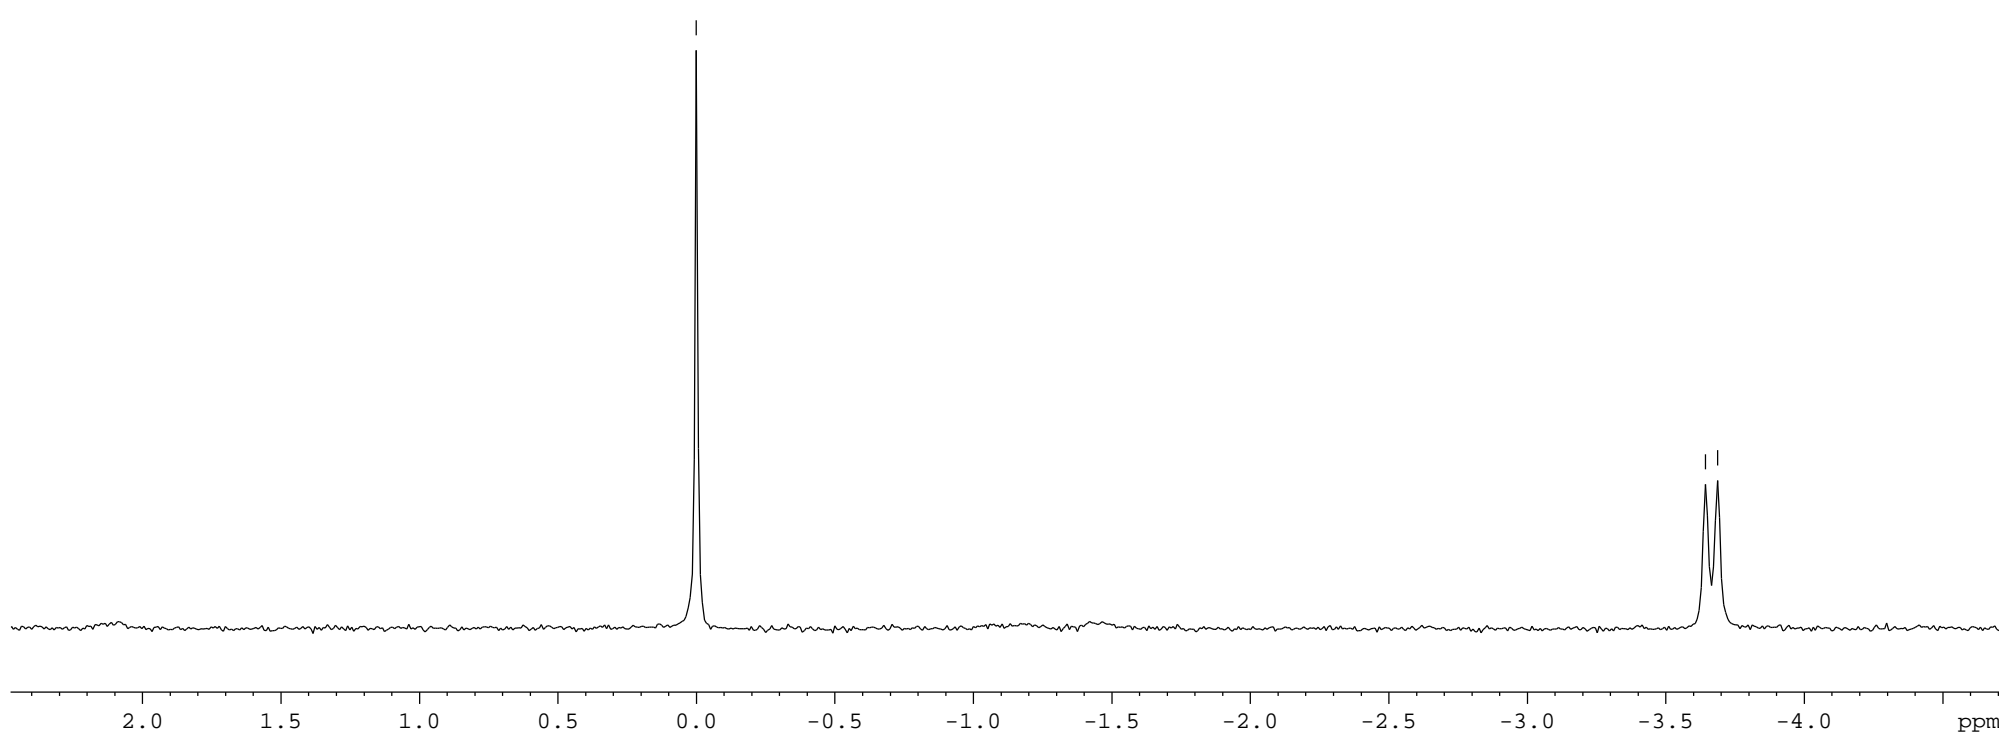

*N*-methylmorpholino-4-ium 5'-*O*-dimethoxytritylthymidin-3'-yl phosphate **5f**

$^1\text{H}$ - $^1\text{H}$  COSY (DMSO- $d_6$ )

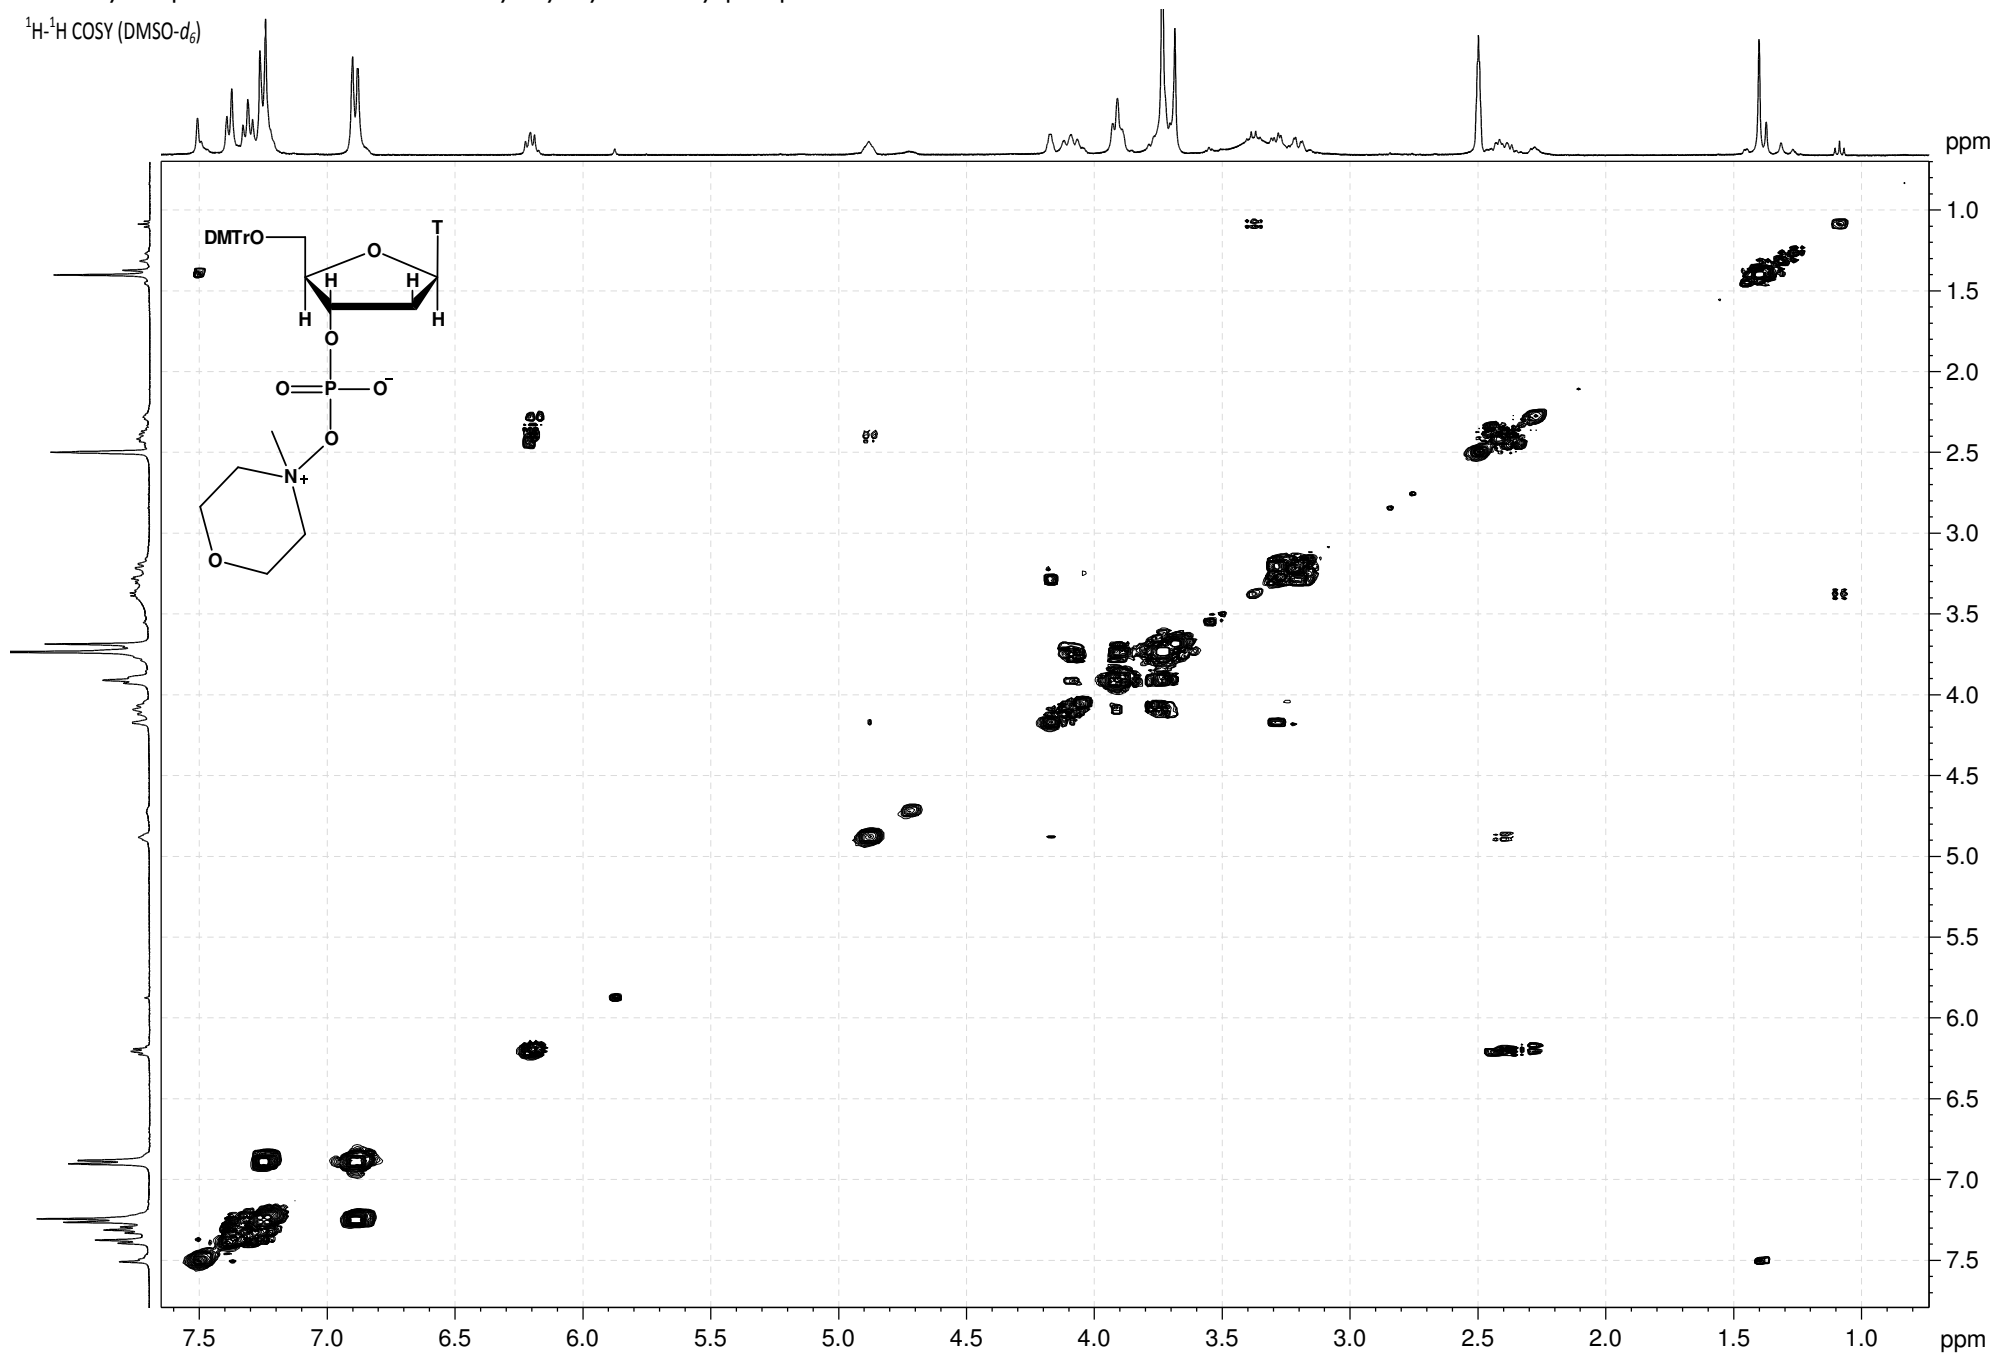

*N*-methylmorpholino-4-ium 5'-*O*-dimethoxytritylthymidin-3'-yl phosphate **5f**

$^1\text{H}$ - $^{13}\text{C}$  HSQC (DMSO- $d_6$ )

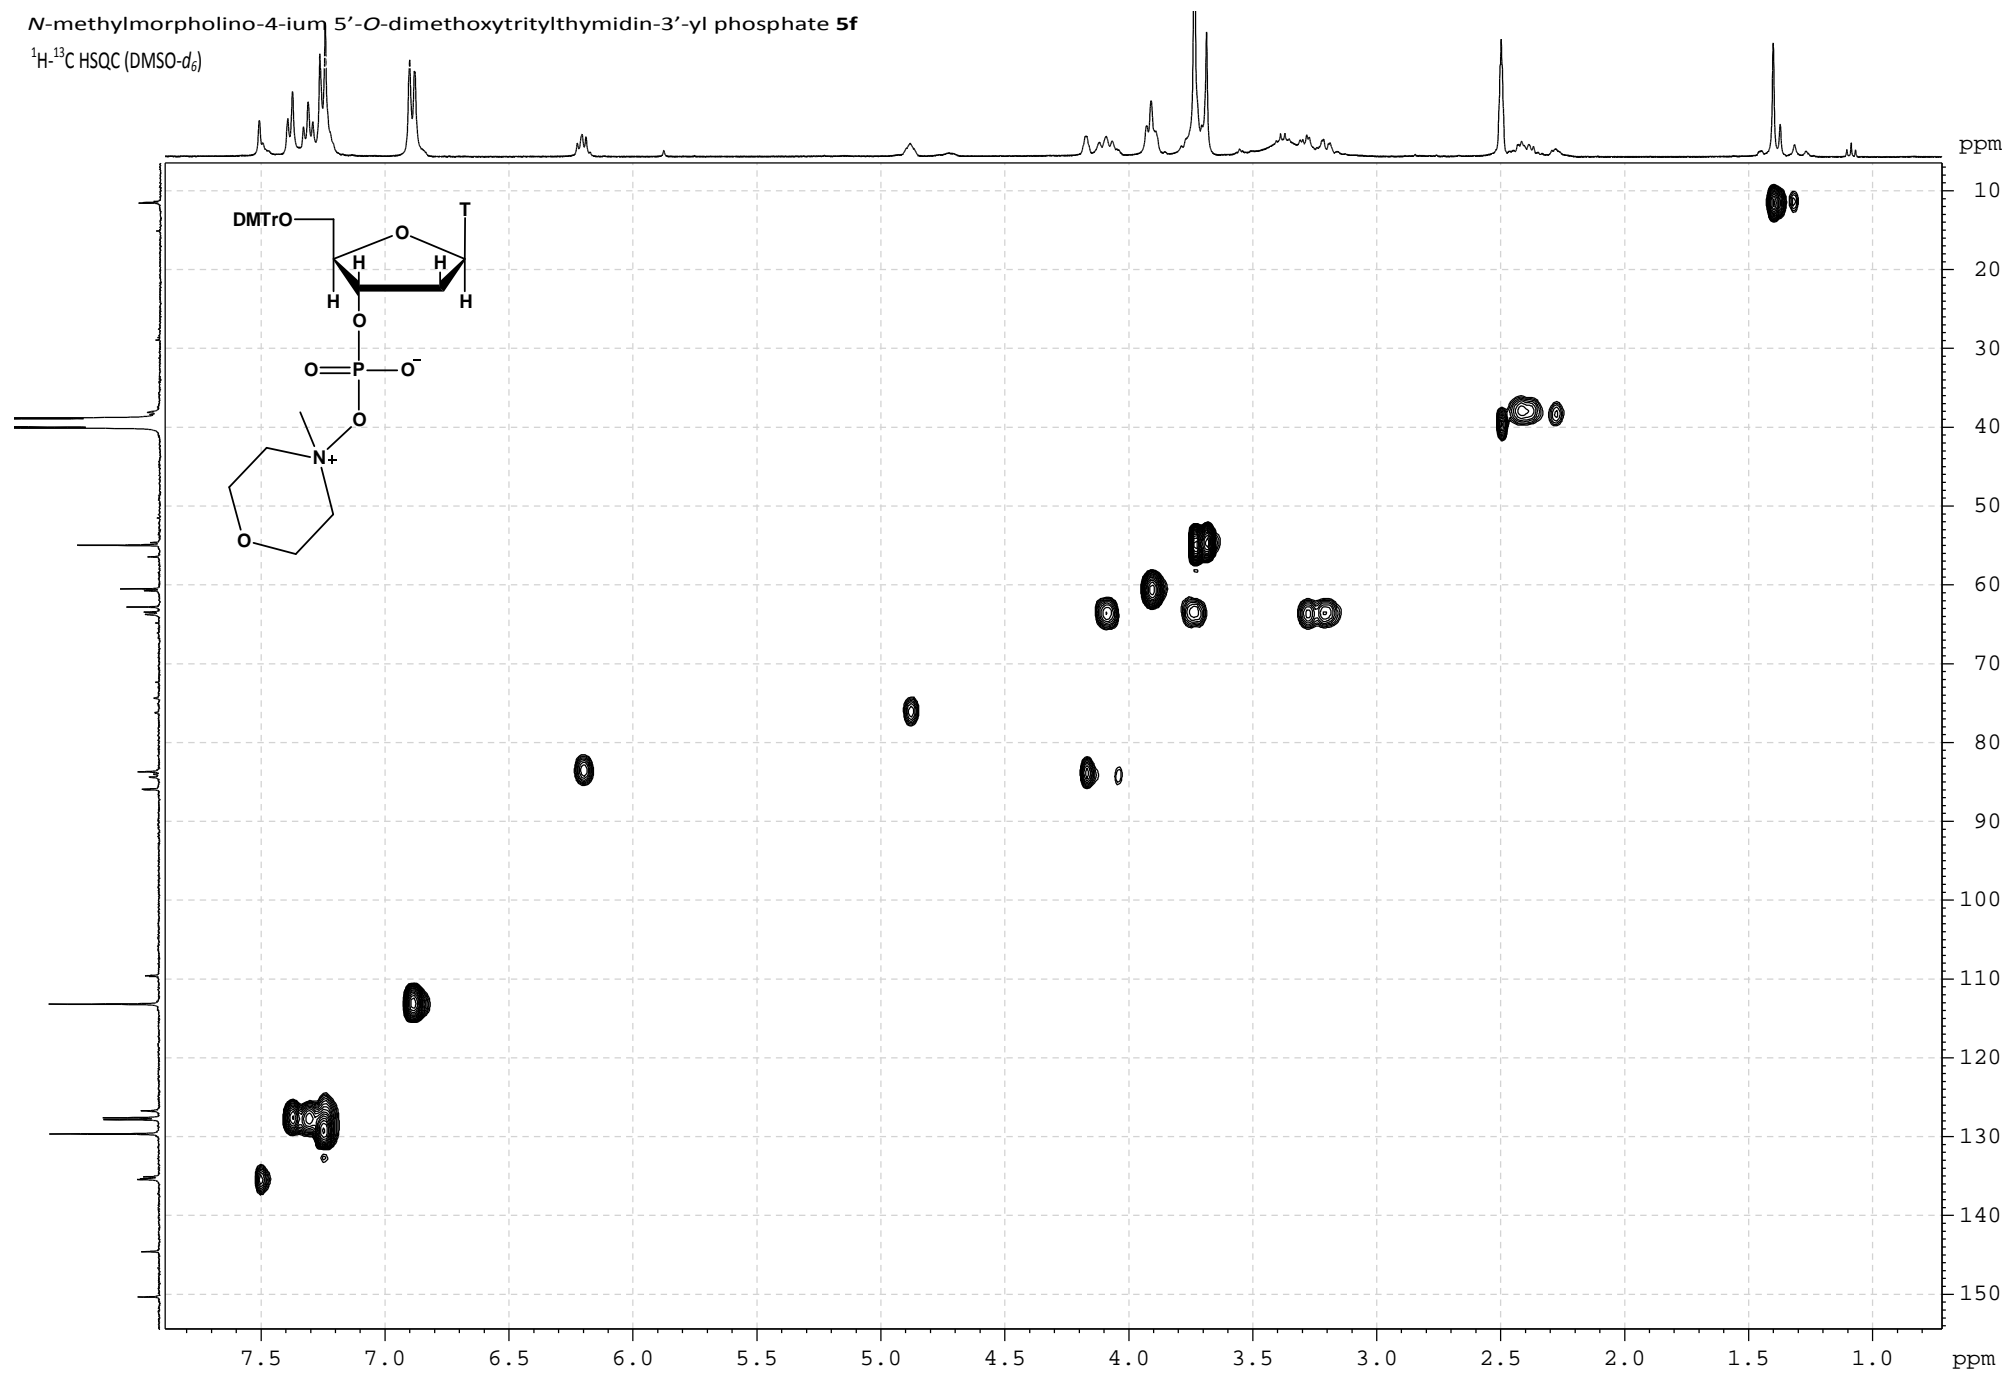

# Mass Spectrum SmartFormula Report

## Analysis Info

Analysis Name D:\Data\Basia\zlecone\15\_02\_23\_A6neg.d  
 Method ewelina.m  
 Sample Name  
 Comment

Acquisition Date 2/23/2015 11:37:44 AM

Operator Bruker Customer  
 Instrument / Ser# micrOTOF-Q 128

## Acquisition Parameter

|             |            |                       |           |                  |           |
|-------------|------------|-----------------------|-----------|------------------|-----------|
| Source Type | ESI        | Ion Polarity          | Negative  | Set Nebulizer    | 0.4 Bar   |
| Focus       | Not active | Set Capillary         | 3200 V    | Set Dry Heater   | 220 °C    |
| Scan Begin  | 100 m/z    | Set End Plate Offset  | -500 V    | Set Dry Gas      | 4.0 l/min |
| Scan End    | 1200 m/z   | Set Collision Cell RF | 200.0 Vpp | Set Divert Valve | Source    |

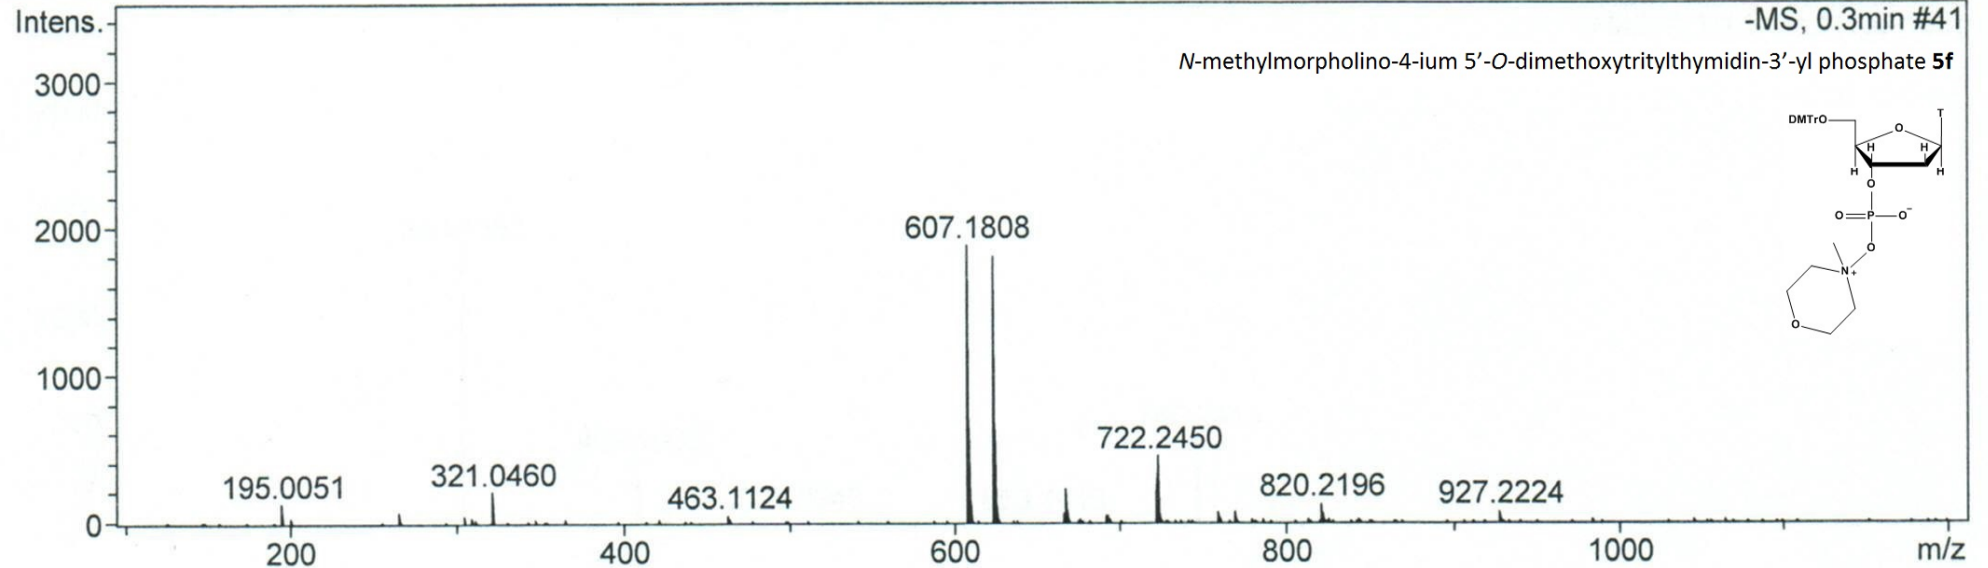

| Meas<br>m/z | # | Form<br>ula | m/z      | err<br>[ppm] | Mean<br>err<br>[ppm] | rdb | N-Ru<br>le | e <sup>-</sup><br>Conf | mSig<br>ma | Std I | Std<br>Mean<br>m/z | Std I<br>VarN<br>orm | Std<br>m/z<br>Diff | Std<br>Com<br>b<br>Dev |
|-------------|---|-------------|----------|--------------|----------------------|-----|------------|------------------------|------------|-------|--------------------|----------------------|--------------------|------------------------|
| 195.0051    |   |             | 195.0051 |              |                      |     |            |                        |            |       |                    |                      |                    |                        |
| 321.0460    |   |             | 321.0460 |              |                      |     |            |                        |            |       |                    |                      |                    |                        |
| 463.1124    |   |             | 463.1124 |              |                      |     |            |                        |            |       |                    |                      |                    |                        |
| 607.1808    |   |             | 607.1808 |              |                      |     |            |                        |            |       |                    |                      |                    |                        |
| 722.2450    |   |             | 722.2450 |              |                      |     |            |                        |            |       |                    |                      |                    |                        |
| 820.2196    |   |             | 820.2196 |              |                      |     |            |                        |            |       |                    |                      |                    |                        |
| 927.2224    |   |             | 927.2224 |              |                      |     |            |                        |            |       |                    |                      |                    |                        |

# Mass Spectrum SmartFormula Report

## Analysis Info

Analysis Name D:\Data\Basia\zlecone\15\_02\_23\_A6.d  
 Method ewelina.m  
 Sample Name blank  
 Comment

Acquisition Date 2/23/2015 10:31:52 AM

Operator Bruker Customer  
 Instrument / Ser# micrOTOF-Q 128

## Acquisition Parameter

|             |            |                       |           |                  |           |
|-------------|------------|-----------------------|-----------|------------------|-----------|
| Source Type | ESI        | Ion Polarity          | Positive  | Set Nebulizer    | 0.4 Bar   |
| Focus       | Not active | Set Capillary         | 4500 V    | Set Dry Heater   | 220 °C    |
| Scan Begin  | 100 m/z    | Set End Plate Offset  | -500 V    | Set Dry Gas      | 4.0 l/min |
| Scan End    | 1200 m/z   | Set Collision Cell RF | 200.0 Vpp | Set Divert Valve | Source    |

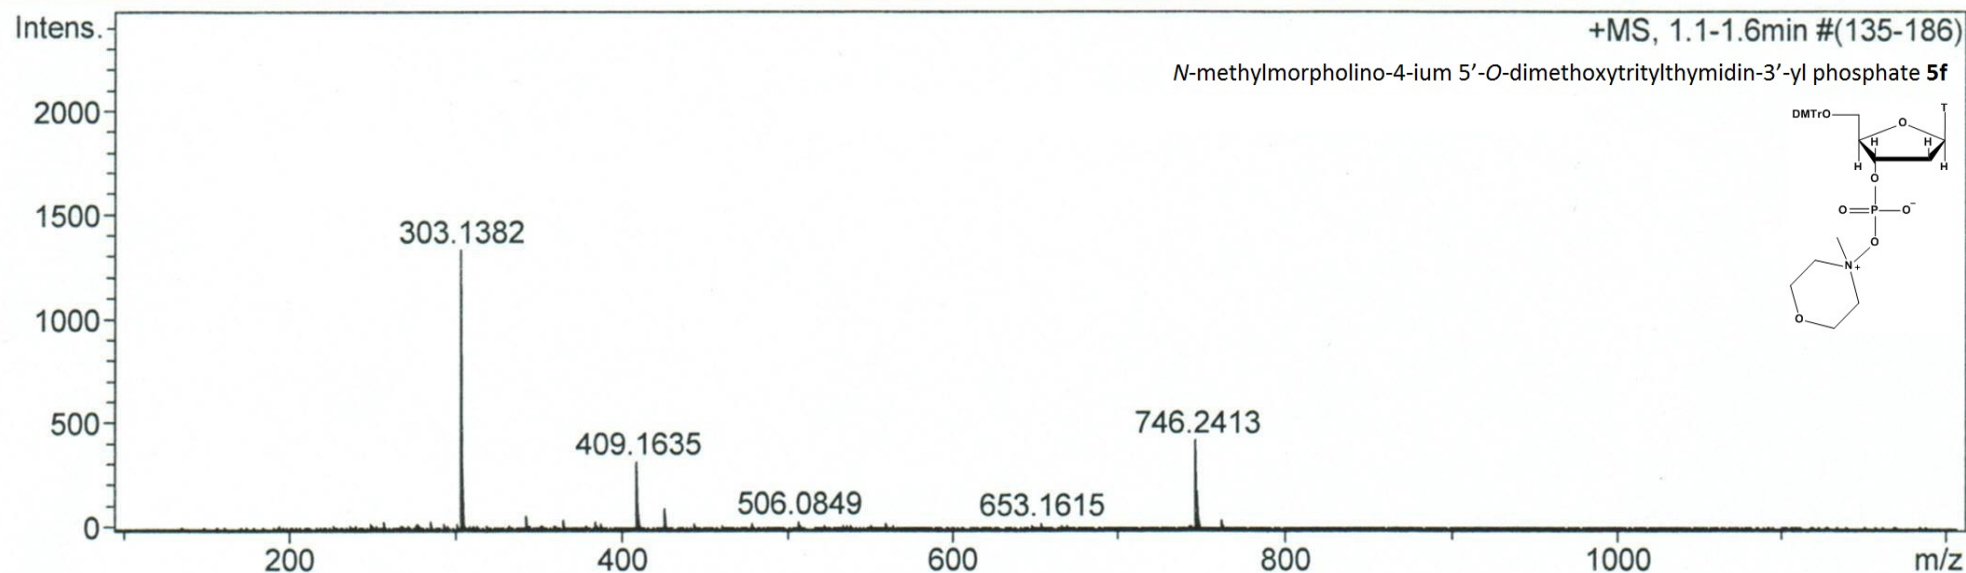

*N*-methylmorpholino-4-ium 5'-*O*-dimethoxytritylthymidin-3'-yl phosphate **5f**

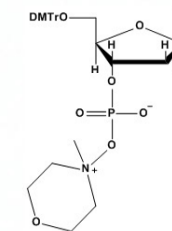

| Meas<br>. m/z | # | Form<br>ula | m/z      | err<br>[ppm] | Mean<br>err<br>[ppm] | rdb | N-Ru<br>le | e <sup>-</sup><br>Conf | mSig<br>ma | Std I | Std<br>Mean<br>m/z | Std I<br>VarN<br>orm | Std<br>m/z<br>Diff | Std<br>Com<br>b<br>Dev |
|---------------|---|-------------|----------|--------------|----------------------|-----|------------|------------------------|------------|-------|--------------------|----------------------|--------------------|------------------------|
| 303.1382      |   |             | 303.1382 |              |                      |     |            |                        |            |       |                    |                      |                    |                        |
| 409.1635      |   |             | 409.1635 |              |                      |     |            |                        |            |       |                    |                      |                    |                        |
| 506.0849      |   |             | 506.0849 |              |                      |     |            |                        |            |       |                    |                      |                    |                        |
| 653.1615      |   |             | 653.1615 |              |                      |     |            |                        |            |       |                    |                      |                    |                        |
| 746.2413      |   |             | 746.2413 |              |                      |     |            |                        |            |       |                    |                      |                    |                        |
